# Supplementary material for: Bacterial Atlas of Mouse Gut Microbiota
Source: Hindawi journal article supplement (doi:10.1155/2022/5968814), 2022-04-11
Supplement: f1 [file 5968814.f1.docx]

| **Table S1. Diversities of bacterial communities of mouse gut microbiota*.** | | | | | | |
| --- | --- | --- | --- | --- | --- | --- |
| **Sample ID** | **Reads** | **Operational taxonomic unit (OTU)** | **Coverage** | **Shannon** | **Simpson** | **Chao** |
| 0C1 | 27459 | 341 | 99.81% | 4.07 | 0.0353 | 388 |
| 0C2 | 27459 | 248 | 99.79% | 3.54 | 0.0593 | 300 |
| 0C3 | 27459 | 333 | 99.75% | 4.08 | 0.0388 | 423 |
| 0C4 | 27459 | 439 | 99.72% | 4.1 | 0.0416 | 498 |
| 0C5 | 27459 | 439 | 99.75% | 4.33 | 0.0357 | 486 |
| 0C6 | 27459 | 439 | 99.71% | 4.51 | 0.0247 | 507 |
| 0C7 | 27459 | 423 | 99.62% | 3.85 | 0.0577 | 535 |
| 0C8 | 27459 | 418 | 99.65% | 3.87 | 0.0592 | 538 |
| 0C9 | 27459 | 394 | 99.69% | 3.9 | 0.051 | 472 |
| 0C10 | 27459 | 437 | 99.71% | 4.2 | 0.0444 | 503 |
| 0C11 | 27459 | 391 | 99.63% | 3.15 | 0.0957 | 477 |
| 0C12 | 27459 | 393 | 99.62% | 3.59 | 0.0659 | 509 |
| 0C13 | 27459 | 458 | 99.66% | 3.71 | 0.0639 | 544 |
| 0C14 | 27459 | 462 | 99.73% | 4.13 | 0.0417 | 519 |
| 0C15 | 27459 | 316 | 99.67% | 3.01 | 0.1086 | 403 |
| 0C16 | 27459 | 519 | 99.60% | 4.29 | 0.0391 | 628 |
| 0C17 | 27459 | 536 | 99.66% | 4.57 | 0.0294 | 623 |
| 0C18 | 27459 | 443 | 99.56% | 3.88 | 0.0669 | 575 |
| 0C19 | 27459 | 514 | 99.46% | 3.99 | 0.0494 | 687 |
| 0C20 | 27459 | 552 | 99.48% | 4.13 | 0.0438 | 716 |
| 0C21 | 27459 | 319 | 99.63% | 3.08 | 0.114 | 431 |
| 0C22 | 27459 | 401 | 99.62% | 3.25 | 0.1068 | 515 |
| 0C23 | 27459 | 346 | 99.61% | 3.02 | 0.1115 | 485 |
| 0C24 | 27459 | 379 | 99.59% | 3.6 | 0.0525 | 503 |
| 0C25 | 27459 | 422 | 99.62% | 3.51 | 0.0675 | 518 |
| 0C26 | 27459 | 303 | 99.76% | 3.75 | 0.0831 | 386 |
| 0C27 | 27459 | 402 | 99.65% | 3.86 | 0.042 | 495 |
| 0C28 | 27459 | 450 | 99.73% | 4.64 | 0.0207 | 519 |
| 0C29 | 27459 | 485 | 99.74% | 4.84 | 0.0151 | 543 |
| 0C30 | 27459 | 338 | 99.67% | 3.76 | 0.0491 | 454 |
| 0C31 | 27459 | 529 | 99.68% | 4.77 | 0.0178 | 610 |
| 0C32 | 27459 | 432 | 99.74% | 4.4 | 0.0321 | 488 |
| 0C33 | 27459 | 471 | 99.69% | 4.37 | 0.0292 | 541 |
| 0C34 | 27459 | 369 | 99.62% | 3.37 | 0.0831 | 506 |
| 0C35 | 27459 | 428 | 99.65% | 3.8 | 0.0626 | 539 |
| 0C36 | 27459 | 402 | 99.71% | 3.74 | 0.0588 | 476 |
| 0C37 | 27459 | 417 | 99.60% | 4.08 | 0.0336 | 535 |
| 0C38 | 27459 | 439 | 99.72% | 3.83 | 0.1103 | 505 |
| 0C39 | 27459 | 484 | 99.70% | 4.75 | 0.0209 | 567 |
| 0C40 | 27459 | 459 | 99.74% | 4.63 | 0.0216 | 518 |
| 0C41 | 27459 | 389 | 99.65% | 3.48 | 0.0872 | 473 |
| 0C42 | 27459 | 455 | 99.74% | 4.13 | 0.0426 | 507 |
| 0C43 | 27459 | 306 | 99.67% | 3.66 | 0.0494 | 395 |
| 0C44 | 27459 | 518 | 99.68% | 4.53 | 0.0289 | 578 |
| 0C45 | 27459 | 463 | 99.59% | 3.92 | 0.0497 | 576 |
| 0C46 | 27459 | 489 | 99.72% | 4.82 | 0.019 | 562 |
| 0C47 | 27459 | 306 | 99.77% | 3.64 | 0.048 | 357 |
| 0C48 | 27459 | 371 | 99.78% | 4.25 | 0.0337 | 415 |
| 0C49 | 27459 | 324 | 99.77% | 3.9 | 0.043 | 380 |
| 0C50 | 27459 | 483 | 99.69% | 4.31 | 0.0435 | 597 |
| 0C51 | 27459 | 526 | 99.71% | 4.59 | 0.0305 | 601 |
| 0C52 | 27459 | 484 | 99.74% | 4.17 | 0.0544 | 530 |
| 0C53 | 27459 | 254 | 99.75% | 3.01 | 0.1261 | 330 |
| 0C54 | 27459 | 313 | 99.73% | 3.28 | 0.1126 | 400 |
| 0C55 | 27459 | 327 | 99.82% | 3.99 | 0.0447 | 356 |
| 0C56 | 27459 | 338 | 99.74% | 3.64 | 0.05 | 400 |
| 0C57 | 27459 | 340 | 99.80% | 4.26 | 0.0264 | 382 |
| 0C58 | 27459 | 316 | 99.80% | 3.92 | 0.0407 | 365 |
| 0C59 | 27459 | 526 | 99.75% | 4.8 | 0.0189 | 569 |
| 0C60 | 27459 | 490 | 99.70% | 4.44 | 0.0413 | 551 |
| 0C61 | 27459 | 526 | 99.68% | 4.55 | 0.033 | 597 |
| 0C62 | 27459 | 333 | 99.69% | 3.38 | 0.0806 | 476 |
| 0C63 | 27459 | 343 | 99.75% | 3.44 | 0.0773 | 400 |
| 0C64 | 27459 | 407 | 99.73% | 3.84 | 0.0703 | 461 |
| 0C65 | 27459 | 486 | 99.65% | 4.27 | 0.0532 | 565 |
| 0C66 | 27459 | 490 | 99.79% | 4.42 | 0.0276 | 517 |
| 0C67 | 27459 | 508 | 99.69% | 4.65 | 0.0241 | 591 |
| 0C68 | 27459 | 481 | 99.67% | 4.69 | 0.021 | 581 |
| 0C69 | 27459 | 472 | 99.64% | 4.3 | 0.0391 | 557 |
| 0C70 | 27459 | 415 | 99.71% | 4.28 | 0.0277 | 529 |
| 0C71 | 27459 | 489 | 99.63% | 4.25 | 0.0369 | 609 |
| 0C72 | 27459 | 432 | 99.60% | 4.12 | 0.0324 | 565 |
| 0C73 | 27459 | 522 | 99.62% | 4.66 | 0.0251 | 634 |
| 0C74 | 27459 | 483 | 99.65% | 3.69 | 0.1158 | 563 |
| 0C75 | 27459 | 486 | 99.72% | 3.84 | 0.0991 | 537 |
| 0C76 | 27459 | 278 | 99.76% | 2.79 | 0.1965 | 365 |
| 0C77 | 27459 | 497 | 99.69% | 4.29 | 0.0511 | 570 |
| 0C78 | 27459 | 503 | 99.72% | 4.36 | 0.0489 | 556 |
| 0C79 | 27459 | 490 | 99.63% | 3.46 | 0.1414 | 573 |
| 0C80 | 27459 | 408 | 99.67% | 3.84 | 0.0754 | 522 |
| 0C81 | 27459 | 390 | 99.76% | 4.24 | 0.0309 | 441 |
| 0C82 | 27459 | 452 | 99.70% | 4.26 | 0.0405 | 511 |
| 0C83 | 27459 | 491 | 99.71% | 4.38 | 0.0516 | 566 |
| 0C84 | 27459 | 503 | 99.69% | 4.08 | 0.0888 | 577 |
| 0C85 | 27459 | 525 | 99.67% | 4.44 | 0.0495 | 605 |
| 0C86 | 27459 | 510 | 99.71% | 4.58 | 0.0236 | 575 |
| 0C87 | 27459 | 513 | 99.67% | 4.16 | 0.0629 | 585 |
| 0C88 | 27459 | 424 | 99.69% | 3.55 | 0.0915 | 489 |
| 0C89 | 27459 | 404 | 99.64% | 3.32 | 0.1115 | 492 |
| 0C90 | 27459 | 409 | 99.65% | 3.47 | 0.1088 | 504 |
| 0C91 | 27459 | 496 | 99.74% | 4.85 | 0.015 | 546 |
| 0C92 | 27459 | 433 | 99.65% | 3.63 | 0.0739 | 526 |
| 0C93 | 27459 | 416 | 99.62% | 3.23 | 0.118 | 504 |
| 0C94 | 27459 | 340 | 99.73% | 3.32 | 0.1024 | 411 |
| 0C95 | 27459 | 368 | 99.73% | 3.47 | 0.09 | 439 |
| 0C96 | 27459 | 414 | 99.76% | 4.18 | 0.0358 | 469 |
| 0C97 | 27459 | 372 | 99.63% | 3.19 | 0.1055 | 492 |
| 0C98 | 27459 | 468 | 99.72% | 3.9 | 0.0555 | 525 |
| 0C99 | 27459 | 378 | 99.66% | 3.07 | 0.1222 | 456 |
| 0C100 | 27459 | 379 | 99.67% | 3.3 | 0.0934 | 449 |
| 0C101 | 27459 | 416 | 99.63% | 3.57 | 0.0669 | 502 |
| 0C102 | 27459 | 366 | 99.72% | 3.2 | 0.1214 | 423 |
| 0C103 | 27459 | 384 | 99.68% | 3.26 | 0.1092 | 467 |
| 0C104 | 27459 | 390 | 99.62% | 3.09 | 0.1109 | 509 |
| 0C105 | 27459 | 435 | 99.71% | 4.04 | 0.0574 | 523 |
| 0C106 | 27459 | 425 | 99.62% | 3.01 | 0.1899 | 526 |
| 0C107 | 27459 | 409 | 99.72% | 3.76 | 0.0663 | 458 |
| 0C108 | 27459 | 335 | 99.65% | 2.48 | 0.2701 | 428 |
| 0C109 | 27459 | 360 | 99.67% | 3.52 | 0.0876 | 451 |
| 0C110 | 27459 | 372 | 99.70% | 2.82 | 0.2147 | 444 |
| 0C111 | 27459 | 486 | 99.73% | 4.35 | 0.0494 | 544 |
| 0C112 | 27459 | 467 | 99.64% | 3.43 | 0.1348 | 547 |
| 0C113 | 27459 | 517 | 99.60% | 3.87 | 0.0786 | 628 |
| 0C114 | 27459 | 436 | 99.71% | 4.08 | 0.0536 | 524 |
| 0C115 | 27459 | 548 | 99.62% | 4.27 | 0.0491 | 653 |
| 0C116 | 27459 | 332 | 99.68% | 3.34 | 0.0759 | 409 |
| 0C117 | 27459 | 528 | 99.66% | 4.19 | 0.0542 | 593 |
| 0C118 | 27459 | 293 | 99.69% | 2.89 | 0.1053 | 389 |
| 0C119 | 27459 | 410 | 99.61% | 3.1 | 0.1197 | 511 |
| 0C120 | 27459 | 327 | 99.67% | 2.58 | 0.1746 | 432 |
| 0C121 | 27459 | 404 | 99.65% | 2.88 | 0.1997 | 486 |
| 0C122 | 27459 | 336 | 99.69% | 2.2 | 0.3759 | 406 |
| 0C123 | 27459 | 168 | 99.78% | 1.53 | 0.4456 | 231 |
| 0C124 | 27459 | 282 | 99.70% | 2.56 | 0.2049 | 363 |
| 0C125 | 27459 | 203 | 99.75% | 1.98 | 0.3238 | 286 |
| 0C126 | 27459 | 213 | 99.79% | 2.27 | 0.3031 | 266 |
| 0C127 | 27459 | 197 | 99.80% | 1.68 | 0.4321 | 248 |
| 0C128 | 27459 | 423 | 99.60% | 2.82 | 0.2522 | 532 |
| 0C129 | 27459 | 208 | 99.80% | 2.07 | 0.3496 | 250 |
| 0C130 | 27459 | 495 | 99.63% | 4.51 | 0.0275 | 612 |
| 0C131 | 27459 | 456 | 99.70% | 4.36 | 0.0323 | 531 |
| 0C132 | 27459 | 506 | 99.58% | 4.45 | 0.0333 | 648 |
| 0C133 | 27459 | 356 | 99.71% | 3.93 | 0.0415 | 428 |
| 0C134 | 27459 | 306 | 99.73% | 3.62 | 0.0609 | 394 |
| 0C135 | 27459 | 271 | 99.70% | 2.48 | 0.2957 | 377 |
| 0C136 | 27459 | 167 | 99.79% | 1.61 | 0.4348 | 245 |
| 0C137 | 27459 | 188 | 99.81% | 1.79 | 0.4061 | 234 |
| 0C138 | 27459 | 454 | 99.70% | 4.14 | 0.0499 | 549 |
| 0C139 | 27459 | 496 | 99.71% | 4.39 | 0.028 | 559 |
| 0C140 | 27459 | 403 | 99.65% | 3.31 | 0.0956 | 472 |
| 0C141 | 27459 | 237 | 99.75% | 2.52 | 0.1651 | 321 |
| 0C142 | 27459 | 314 | 99.76% | 3.27 | 0.0995 | 375 |
| 0C143 | 27459 | 291 | 99.76% | 3.02 | 0.1406 | 352 |
| 0C144 | 27459 | 490 | 99.65% | 4.61 | 0.0233 | 576 |
| 0C145 | 27459 | 442 | 99.72% | 4.54 | 0.0197 | 528 |
| 0C146 | 27459 | 449 | 99.76% | 4.61 | 0.0221 | 509 |
| 0C147 | 27459 | 360 | 99.71% | 3.4 | 0.0826 | 433 |
| 0C148 | 27459 | 386 | 99.75% | 3.83 | 0.0602 | 446 |
| 0C149 | 27459 | 413 | 99.72% | 3.82 | 0.0626 | 492 |
| 0C150 | 27459 | 451 | 99.65% | 3.53 | 0.0854 | 537 |
| 0C151 | 27459 | 341 | 99.63% | 3.15 | 0.0923 | 440 |
| 0C152 | 27459 | 355 | 99.67% | 3.38 | 0.0701 | 423 |
| 0C153 | 27459 | 315 | 99.72% | 3.64 | 0.0491 | 383 |
| 0C154 | 27459 | 334 | 99.61% | 3.59 | 0.0575 | 498 |
| 0C155 | 27459 | 383 | 99.68% | 3.54 | 0.0766 | 472 |
| 0C156 | 27459 | 377 | 99.73% | 3.33 | 0.1244 | 432 |
| 0C157 | 27459 | 466 | 99.69% | 3.74 | 0.0871 | 539 |
| 0C158 | 27459 | 434 | 99.66% | 3.71 | 0.0621 | 512 |
| 0C159 | 27459 | 455 | 99.65% | 3.91 | 0.0462 | 538 |
| 0C160 | 27459 | 449 | 99.62% | 3.85 | 0.0533 | 543 |
| 0C161 | 27459 | 439 | 99.67% | 3.48 | 0.0993 | 534 |
| 0C162 | 27459 | 467 | 99.70% | 3.89 | 0.063 | 532 |
| 0C163 | 27459 | 394 | 99.65% | 3.25 | 0.1121 | 469 |
| 0C164 | 27459 | 240 | 99.72% | 2.24 | 0.2387 | 319 |
| 0C165 | 27459 | 514 | 99.72% | 4.86 | 0.0145 | 581 |
| 0C166 | 27459 | 486 | 99.71% | 4.31 | 0.0323 | 546 |
| 0C167 | 27459 | 537 | 99.71% | 4.87 | 0.0152 | 609 |
| 0C168 | 27459 | 196 | 99.83% | 2.42 | 0.1861 | 232 |
| 0C169 | 27459 | 283 | 99.72% | 2.31 | 0.2657 | 351 |
| 0C170 | 27459 | 284 | 99.70% | 2.57 | 0.1971 | 365 |
| 0C171 | 27459 | 225 | 99.77% | 2.88 | 0.1179 | 295 |
| 0C172 | 27459 | 446 | 99.61% | 2.98 | 0.2148 | 527 |
| 0C173 | 27459 | 295 | 99.65% | 2.08 | 0.3362 | 396 |
| 0C174 | 27459 | 334 | 99.72% | 3.45 | 0.0689 | 391 |
| 0C175 | 27459 | 386 | 99.84% | 4.63 | 0.0227 | 425 |
| 0C176 | 27459 | 384 | 99.80% | 3.89 | 0.0501 | 424 |
| 0C177 | 27459 | 378 | 99.71% | 3.08 | 0.1447 | 425 |
| 0C178 | 27459 | 432 | 99.62% | 3.77 | 0.0659 | 523 |
| 0C179 | 27459 | 478 | 99.69% | 3.59 | 0.1229 | 544 |
| 0C180 | 27459 | 291 | 99.76% | 3.1 | 0.1052 | 367 |
| 0C181 | 27459 | 352 | 99.69% | 3.12 | 0.1022 | 426 |
| 0C182 | 27459 | 310 | 99.82% | 3.32 | 0.0878 | 352 |
| 0C183 | 27459 | 504 | 99.68% | 4.96 | 0.0143 | 597 |
| 0C184 | 27459 | 513 | 99.56% | 4.4 | 0.0295 | 665 |
| 0C185 | 27459 | 539 | 99.68% | 4.72 | 0.0225 | 619 |
| 0C186 | 27459 | 467 | 99.69% | 4.61 | 0.0212 | 545 |
| 0C187 | 27459 | 501 | 99.61% | 4.68 | 0.0182 | 639 |
| 0C188 | 27459 | 427 | 99.67% | 4.02 | 0.0418 | 516 |
| 0C189 | 27459 | 337 | 99.81% | 3.87 | 0.0519 | 376 |
| 0C190 | 27459 | 408 | 99.75% | 4.22 | 0.0389 | 489 |
| 0C191 | 27459 | 335 | 99.73% | 3.71 | 0.0511 | 410 |
| 0C192 | 27459 | 487 | 99.74% | 4.59 | 0.0295 | 554 |
| 0C193 | 27459 | 301 | 99.76% | 3.45 | 0.0583 | 350 |
| 0C194 | 27459 | 313 | 99.72% | 3.09 | 0.1047 | 386 |
| 0C195 | 27459 | 499 | 99.72% | 4.65 | 0.0199 | 555 |
| 0C196 | 27459 | 455 | 99.72% | 4.36 | 0.0305 | 511 |
| 0C197 | 27459 | 519 | 99.56% | 4 | 0.0749 | 638 |
| 0C198 | 27459 | 423 | 99.80% | 4.68 | 0.0181 | 472 |
| 0C199 | 27459 | 322 | 99.83% | 4.25 | 0.0356 | 365 |
| 0C200 | 27459 | 445 | 99.71% | 4.48 | 0.0278 | 512 |
| 0C201 | 27459 | 379 | 99.80% | 4.06 | 0.0436 | 434 |
| 0C202 | 27459 | 394 | 99.77% | 4.1 | 0.0468 | 453 |
| 0C203 | 27459 | 454 | 99.75% | 4.44 | 0.0274 | 514 |
| 0C204 | 27459 | 388 | 99.61% | 3.34 | 0.1019 | 470 |
| 0C205 | 27459 | 376 | 99.69% | 3.61 | 0.0553 | 465 |
| 0C206 | 27459 | 417 | 99.55% | 3.42 | 0.0973 | 553 |
| 0C207 | 27459 | 346 | 99.67% | 3.44 | 0.069 | 439 |
| 0C208 | 27459 | 400 | 99.72% | 3.9 | 0.0503 | 460 |
| 0C209 | 27459 | 341 | 99.70% | 3.53 | 0.0617 | 410 |
| 0C210 | 27459 | 432 | 99.60% | 3.05 | 0.1836 | 545 |
| 0C211 | 27459 | 454 | 99.64% | 3.49 | 0.1045 | 547 |
| 0C212 | 27459 | 403 | 99.71% | 3.28 | 0.1286 | 465 |
| 0C213 | 27459 | 308 | 99.75% | 3.19 | 0.1152 | 373 |
| 0C214 | 27459 | 360 | 99.83% | 4.27 | 0.0402 | 390 |
| 0C215 | 27459 | 374 | 99.70% | 3.8 | 0.0566 | 469 |
| 0C216 | 27459 | 515 | 99.59% | 3.83 | 0.0717 | 607 |
| 0C217 | 27459 | 381 | 99.67% | 3.36 | 0.0829 | 440 |
| 0C218 | 27459 | 385 | 99.58% | 3.34 | 0.0839 | 522 |
| 0C219 | 27459 | 233 | 99.76% | 2.48 | 0.1865 | 291 |
| 0C220 | 27459 | 225 | 99.71% | 1.93 | 0.3849 | 306 |
| 0C221 | 27459 | 207 | 99.73% | 2.35 | 0.1788 | 298 |
| 0C222 | 27459 | 407 | 99.60% | 3.13 | 0.1127 | 510 |
| 0C223 | 27459 | 331 | 99.67% | 3.21 | 0.0785 | 429 |
| 0C224 | 27459 | 427 | 99.73% | 3.7 | 0.0617 | 488 |
| 0C225 | 27459 | 394 | 99.77% | 4.31 | 0.0442 | 457 |
| 0C226 | 27459 | 311 | 99.76% | 2.97 | 0.1714 | 372 |
| 0C227 | 27459 | 402 | 99.74% | 3.75 | 0.086 | 453 |
| 0C228 | 27459 | 320 | 99.79% | 3.82 | 0.0524 | 387 |
| 0C229 | 27459 | 354 | 99.83% | 4.45 | 0.0216 | 384 |
| 0C230 | 27459 | 297 | 99.84% | 4.07 | 0.0384 | 333 |
| 0C231 | 27459 | 301 | 99.65% | 2.44 | 0.1957 | 413 |
| 0C232 | 27459 | 452 | 99.66% | 3.9 | 0.0518 | 539 |
| 0C233 | 27459 | 440 | 99.61% | 3.55 | 0.0667 | 549 |
| 0C234 | 27459 | 333 | 99.74% | 3.57 | 0.0668 | 397 |
| 0C235 | 27459 | 271 | 99.85% | 3.04 | 0.1001 | 301 |
| 0C236 | 27459 | 305 | 99.79% | 3.38 | 0.0806 | 344 |
| 0C237 | 27459 | 394 | 99.57% | 2.75 | 0.1232 | 497 |
| 0C238 | 27459 | 429 | 99.52% | 2.87 | 0.134 | 583 |
| 0C239 | 27459 | 449 | 99.54% | 3.82 | 0.046 | 582 |
| 0C240 | 27459 | 351 | 99.62% | 3.15 | 0.099 | 440 |
| 0C241 | 27459 | 291 | 99.70% | 2.79 | 0.1692 | 372 |
| 0C242 | 27459 | 356 | 99.57% | 2.93 | 0.1348 | 494 |
| 0C243 | 27459 | 410 | 99.67% | 3.46 | 0.073 | 491 |
| 0C244 | 27459 | 342 | 99.68% | 2.87 | 0.129 | 435 |
| 0C245 | 27459 | 413 | 99.60% | 3.46 | 0.0707 | 541 |
| 0C246 | 27459 | 364 | 99.61% | 2.89 | 0.1227 | 506 |
| 0C247 | 27459 | 323 | 99.67% | 2.96 | 0.1262 | 421 |
| 0C248 | 27459 | 420 | 99.64% | 3.81 | 0.0565 | 504 |
| 0C249 | 27459 | 442 | 99.62% | 3.85 | 0.053 | 516 |
| 0C250 | 27459 | 439 | 99.72% | 4 | 0.0529 | 509 |
| 0C251 | 27459 | 382 | 99.63% | 3.25 | 0.1158 | 476 |
| 0C252 | 27459 | 469 | 99.67% | 4.13 | 0.0492 | 560 |
| 0C253 | 27459 | 529 | 99.57% | 4.25 | 0.0336 | 620 |
| 0C254 | 27459 | 527 | 99.70% | 4.31 | 0.0575 | 596 |
| 0C255 | 27459 | 517 | 99.72% | 4.56 | 0.0362 | 582 |
| 0C256 | 27459 | 466 | 99.68% | 4.09 | 0.0579 | 548 |
| 0C257 | 27459 | 460 | 99.59% | 3.69 | 0.0627 | 559 |
| 0C258 | 27459 | 370 | 99.82% | 4.65 | 0.0167 | 409 |
| 0C259 | 27459 | 419 | 99.78% | 4.78 | 0.0147 | 457 |
| 0C260 | 27459 | 370 | 99.77% | 3.91 | 0.0525 | 429 |
| 0C261 | 27459 | 351 | 99.72% | 3.26 | 0.1062 | 464 |
| 0C262 | 27459 | 321 | 99.78% | 3.34 | 0.0795 | 373 |
| 0C263 | 27459 | 342 | 99.77% | 3.16 | 0.114 | 390 |
| 0C264 | 27459 | 436 | 99.73% | 4.14 | 0.047 | 489 |
| 0C265 | 27459 | 511 | 99.68% | 4.48 | 0.0305 | 588 |
| 0C266 | 27459 | 416 | 99.70% | 3.33 | 0.1148 | 487 |
| 0C267 | 27459 | 309 | 99.74% | 3.88 | 0.036 | 378 |
| 0C268 | 27459 | 395 | 99.75% | 3.91 | 0.057 | 447 |
| 0C269 | 27459 | 327 | 99.74% | 3.8 | 0.0518 | 407 |
| 0C270 | 27459 | 318 | 99.74% | 3.08 | 0.143 | 398 |
| 0C271 | 27459 | 148 | 99.85% | 2.11 | 0.2332 | 203 |
| 0C272 | 27459 | 252 | 99.85% | 3.15 | 0.1278 | 281 |
| 0C273 | 27459 | 403 | 99.66% | 3.87 | 0.0653 | 496 |
| 0C274 | 27459 | 452 | 99.61% | 3.36 | 0.1026 | 561 |
| 0C275 | 27459 | 389 | 99.67% | 3.32 | 0.0945 | 474 |
| 0C276 | 27459 | 406 | 99.74% | 4.03 | 0.0497 | 468 |
| 0C277 | 27459 | 442 | 99.69% | 3.66 | 0.0646 | 501 |
| 0C278 | 27459 | 494 | 99.68% | 4.63 | 0.0238 | 579 |
| 0C279 | 27459 | 445 | 99.73% | 3.63 | 0.0907 | 488 |
| 0C280 | 27459 | 367 | 99.67% | 2.68 | 0.2093 | 449 |
| 0C281 | 27459 | 435 | 99.70% | 3.77 | 0.0735 | 492 |
| 0C282 | 27459 | 521 | 99.66% | 3.93 | 0.0938 | 585 |
| 0C283 | 27459 | 391 | 99.61% | 3.53 | 0.084 | 512 |
| 0C284 | 27459 | 467 | 99.62% | 3.36 | 0.1376 | 570 |
| 0C285 | 27459 | 445 | 99.66% | 3.65 | 0.0843 | 538 |
| 0C286 | 27459 | 487 | 99.67% | 4.17 | 0.0459 | 567 |
| 0C287 | 27459 | 484 | 99.71% | 4.08 | 0.0551 | 546 |
| 0C288 | 27459 | 487 | 99.66% | 3.95 | 0.0624 | 562 |
| 0C289 | 27459 | 399 | 99.71% | 2.92 | 0.189 | 457 |
| 0C290 | 27459 | 342 | 99.80% | 3.46 | 0.1111 | 376 |
| 0C291 | 27459 | 440 | 99.71% | 4.1 | 0.0428 | 506 |
| 0C292 | 27459 | 333 | 99.68% | 3.05 | 0.1228 | 416 |
| 0C293 | 27459 | 460 | 99.69% | 3.88 | 0.0567 | 524 |
| 0C294 | 27459 | 432 | 99.66% | 3.56 | 0.0975 | 521 |
| 0C295 | 27459 | 384 | 99.70% | 3.12 | 0.137 | 465 |
| 0C296 | 27459 | 378 | 99.52% | 3 | 0.1148 | 544 |
| 0C297 | 27459 | 320 | 99.68% | 3.09 | 0.1091 | 421 |
| 0C298 | 27459 | 460 | 99.66% | 3.63 | 0.0962 | 533 |
| 0C299 | 27459 | 467 | 99.66% | 3.28 | 0.1678 | 538 |
| 0C300 | 27459 | 479 | 99.60% | 3.67 | 0.0743 | 586 |
| 0X297 | 27459 | 557 | 99.62% | 4.53 | 0.029 | 636 |
| 0X298 | 27459 | 504 | 99.65% | 4.26 | 0.0461 | 601 |
| 0X299 | 27459 | 211 | 99.84% | 2.62 | 0.174 | 252 |
| 0X300 | 27459 | 277 | 99.73% | 2.71 | 0.1327 | 352 |
| 0X1 | 27459 | 348 | 99.67% | 3.07 | 0.1771 | 433 |
| 0X2 | 27459 | 377 | 99.59% | 3.09 | 0.1412 | 536 |
| 0X3 | 27459 | 300 | 99.71% | 3.74 | 0.0501 | 432 |
| 0X4 | 27459 | 388 | 99.64% | 2.74 | 0.1366 | 483 |
| 0X5 | 27459 | 546 | 99.65% | 4.27 | 0.04 | 631 |
| 0X6 | 27459 | 490 | 99.67% | 4.48 | 0.027 | 574 |
| 0X7 | 27459 | 389 | 99.64% | 3.62 | 0.0818 | 500 |
| 0X8 | 27459 | 412 | 99.65% | 3.88 | 0.0621 | 531 |
| 0X9 | 27459 | 342 | 99.68% | 3.34 | 0.0957 | 422 |
| 0X10 | 27459 | 456 | 99.62% | 3.82 | 0.059 | 557 |
| 0X11 | 27459 | 535 | 99.64% | 4.44 | 0.0289 | 617 |
| 0X12 | 27459 | 350 | 99.72% | 3.03 | 0.1626 | 413 |
| 0X13 | 27459 | 503 | 99.57% | 3.58 | 0.0882 | 620 |
| 0X14 | 27459 | 366 | 99.60% | 2.96 | 0.1285 | 493 |
| 0X15 | 27459 | 449 | 99.65% | 3.29 | 0.1157 | 521 |
| 0X16 | 27459 | 501 | 99.62% | 3.97 | 0.0586 | 634 |
| 0X17 | 27459 | 415 | 99.65% | 3.64 | 0.0619 | 503 |
| 0X18 | 27459 | 455 | 99.63% | 3.55 | 0.0743 | 547 |
| 0X19 | 27459 | 452 | 99.64% | 3.9 | 0.0458 | 535 |
| 0X20 | 27459 | 499 | 99.62% | 4.11 | 0.0402 | 608 |
| 0X21 | 27459 | 443 | 99.56% | 3.43 | 0.0705 | 562 |
| 0X22 | 27459 | 197 | 99.77% | 2.06 | 0.2362 | 254 |
| 0X23 | 27459 | 369 | 99.74% | 4.31 | 0.0257 | 438 |
| 0X24 | 27459 | 450 | 99.68% | 4.39 | 0.0423 | 556 |
| 0X25 | 27459 | 534 | 99.66% | 4.76 | 0.0172 | 608 |
| 0X26 | 27459 | 485 | 99.71% | 4.25 | 0.0427 | 542 |
| 0X27 | 27459 | 523 | 99.69% | 4.4 | 0.037 | 598 |
| 0X28 | 27459 | 437 | 99.65% | 4.03 | 0.0424 | 525 |
| 0X29 | 27459 | 547 | 99.65% | 4.67 | 0.0253 | 651 |
| 0X30 | 27459 | 471 | 99.73% | 4.13 | 0.0601 | 524 |
| 0X31 | 27459 | 440 | 99.72% | 4.27 | 0.0347 | 519 |
| 0X32 | 27459 | 424 | 99.71% | 4.2 | 0.0327 | 503 |
| 0X33 | 27459 | 367 | 99.76% | 3.89 | 0.0486 | 472 |
| 0X34 | 27459 | 482 | 99.64% | 4.05 | 0.0648 | 585 |
| 0X35 | 27459 | 454 | 99.73% | 4.33 | 0.0335 | 517 |
| 0X36 | 27459 | 451 | 99.75% | 4.47 | 0.0254 | 493 |
| 0X37 | 27459 | 418 | 99.77% | 4.23 | 0.0335 | 466 |
| 0X38 | 27459 | 449 | 99.77% | 4.55 | 0.021 | 489 |
| 0X39 | 27459 | 463 | 99.57% | 3.68 | 0.1148 | 586 |
| 0X40 | 27459 | 486 | 99.80% | 4.58 | 0.0286 | 513 |
| 0X41 | 27459 | 372 | 99.68% | 3.29 | 0.0892 | 447 |
| 0X42 | 27459 | 517 | 99.65% | 4.36 | 0.0407 | 616 |
| 0X43 | 27459 | 467 | 99.66% | 4.54 | 0.0216 | 564 |
| 0X44 | 27459 | 453 | 99.74% | 4.21 | 0.0363 | 504 |
| 0X45 | 27459 | 384 | 99.65% | 3.95 | 0.038 | 504 |
| 0X46 | 27459 | 464 | 99.64% | 3.48 | 0.1183 | 588 |
| 0X47 | 27459 | 494 | 99.75% | 4.25 | 0.0522 | 536 |
| 0X48 | 27459 | 355 | 99.64% | 3.4 | 0.0736 | 450 |
| 0X49 | 27459 | 339 | 99.75% | 2.96 | 0.1334 | 408 |
| 0X50 | 27459 | 315 | 99.78% | 3.06 | 0.1511 | 376 |
| 0X51 | 27459 | 373 | 99.74% | 3.74 | 0.0603 | 446 |
| 0X52 | 27459 | 275 | 99.80% | 4.09 | 0.0309 | 358 |
| 0X53 | 27459 | 341 | 99.83% | 4.37 | 0.0259 | 381 |
| 0X54 | 27459 | 305 | 99.79% | 3.98 | 0.0428 | 372 |
| 0X55 | 27459 | 262 | 99.67% | 2.43 | 0.2391 | 342 |
| 0X56 | 27459 | 468 | 99.67% | 3.56 | 0.0954 | 534 |
| 0X57 | 27459 | 345 | 99.67% | 3.16 | 0.0962 | 440 |
| 0X58 | 27459 | 351 | 99.77% | 3.83 | 0.0516 | 401 |
| 0X59 | 27459 | 463 | 99.73% | 4.65 | 0.0192 | 529 |
| 0X60 | 27459 | 382 | 99.75% | 3.67 | 0.0727 | 445 |
| 0X61 | 27459 | 392 | 99.67% | 3.36 | 0.0891 | 466 |
| 0X62 | 27459 | 265 | 99.71% | 2.72 | 0.1645 | 355 |
| 0X63 | 27459 | 372 | 99.65% | 3.11 | 0.1151 | 458 |
| 0X64 | 27459 | 463 | 99.68% | 4.66 | 0.0198 | 561 |
| 0X65 | 27459 | 385 | 99.59% | 3.86 | 0.0458 | 573 |
| 0X66 | 27459 | 447 | 99.73% | 4.59 | 0.0222 | 513 |
| 0X67 | 27459 | 480 | 99.64% | 4.53 | 0.023 | 588 |
| 0X68 | 27459 | 479 | 99.66% | 4.31 | 0.0331 | 560 |
| 0X69 | 27459 | 470 | 99.68% | 4.26 | 0.0496 | 555 |
| 0X70 | 27459 | 384 | 99.67% | 3.44 | 0.0714 | 449 |
| 0X71 | 27459 | 422 | 99.56% | 3.12 | 0.1127 | 551 |
| 0X72 | 27459 | 447 | 99.63% | 3.54 | 0.078 | 513 |
| 0X73 | 27459 | 466 | 99.65% | 3.62 | 0.0654 | 534 |
| 0X74 | 27459 | 449 | 99.60% | 3.4 | 0.1022 | 545 |
| 0X75 | 27459 | 435 | 99.63% | 3.76 | 0.058 | 564 |
| 0X76 | 27459 | 484 | 99.69% | 4.45 | 0.0244 | 562 |
| 0X77 | 27459 | 451 | 99.70% | 4.11 | 0.0454 | 530 |
| 0X78 | 27459 | 440 | 99.69% | 3.93 | 0.0517 | 536 |
| 0X79 | 27459 | 384 | 99.67% | 3.6 | 0.062 | 463 |
| 0X80 | 27459 | 402 | 99.62% | 3.29 | 0.0857 | 498 |
| 0X81 | 27459 | 378 | 99.73% | 3.62 | 0.0667 | 444 |
| 0X82 | 27459 | 415 | 99.70% | 3.64 | 0.0861 | 480 |
| 0X83 | 27459 | 418 | 99.69% | 3.55 | 0.0893 | 501 |
| 0X84 | 27459 | 478 | 99.60% | 4.04 | 0.0452 | 603 |
| 0X85 | 27459 | 383 | 99.59% | 3.41 | 0.084 | 530 |
| 0X86 | 27459 | 356 | 99.66% | 2.97 | 0.1296 | 438 |
| 0X87 | 27459 | 380 | 99.66% | 3.03 | 0.1203 | 466 |
| 0X88 | 27459 | 383 | 99.62% | 3.41 | 0.0841 | 490 |
| 0X89 | 27459 | 501 | 99.67% | 4.08 | 0.0452 | 562 |
| 0X90 | 27459 | 412 | 99.70% | 4.08 | 0.0382 | 486 |
| 0X91 | 27459 | 360 | 99.72% | 3.3 | 0.1262 | 437 |
| 0X92 | 27459 | 339 | 99.71% | 3.62 | 0.0805 | 427 |
| 0X93 | 27459 | 410 | 99.69% | 3.83 | 0.0659 | 487 |
| 0X94 | 27459 | 475 | 99.71% | 4.26 | 0.0354 | 527 |
| 0X95 | 27459 | 536 | 99.74% | 4.8 | 0.0183 | 592 |
| 0X96 | 27459 | 352 | 99.68% | 3.63 | 0.0565 | 445 |
| 0X97 | 27459 | 380 | 99.59% | 3.41 | 0.0821 | 500 |
| 0X98 | 27459 | 400 | 99.64% | 3.48 | 0.0777 | 495 |
| 0X99 | 27459 | 400 | 99.61% | 3.43 | 0.0804 | 528 |
| 0X100 | 27459 | 524 | 99.63% | 4.43 | 0.0294 | 621 |
| 0X101 | 27459 | 452 | 99.71% | 3.61 | 0.1215 | 512 |
| 0X102 | 27459 | 373 | 99.75% | 3.69 | 0.0828 | 424 |
| 0X103 | 27459 | 518 | 99.73% | 4.54 | 0.0376 | 573 |
| 0X104 | 27459 | 527 | 99.71% | 4.65 | 0.0239 | 597 |
| 0X105 | 27459 | 501 | 99.69% | 4.23 | 0.0423 | 570 |
| 0X106 | 27459 | 355 | 99.64% | 2.66 | 0.2566 | 482 |
| 0X107 | 27459 | 413 | 99.64% | 3.24 | 0.0879 | 506 |
| 0X108 | 27459 | 394 | 99.67% | 3.12 | 0.1461 | 483 |
| 0X109 | 27459 | 448 | 99.63% | 3.76 | 0.0727 | 568 |
| 0X110 | 27459 | 328 | 99.73% | 3 | 0.1466 | 394 |
| 0X111 | 27459 | 395 | 99.58% | 3.22 | 0.0937 | 501 |
| 0X112 | 27459 | 475 | 99.60% | 3.77 | 0.0662 | 575 |
| 0X113 | 27459 | 490 | 99.56% | 3.77 | 0.0647 | 629 |
| 0X114 | 27459 | 505 | 99.56% | 3.91 | 0.0564 | 628 |
| 0X115 | 27459 | 481 | 99.62% | 3.38 | 0.1303 | 567 |
| 0X116 | 27459 | 277 | 99.62% | 2.15 | 0.2058 | 402 |
| 0X117 | 27459 | 470 | 99.60% | 3.55 | 0.0957 | 601 |
| 0X118 | 27459 | 416 | 99.66% | 3.2 | 0.0945 | 476 |
| 0X119 | 27459 | 517 | 99.63% | 3.89 | 0.0731 | 604 |
| 0X120 | 27459 | 453 | 99.61% | 3.42 | 0.1059 | 571 |
| 0X121 | 27459 | 421 | 99.64% | 3.93 | 0.0461 | 504 |
| 0X122 | 27459 | 466 | 99.65% | 3.66 | 0.0843 | 539 |
| 0X123 | 27459 | 405 | 99.64% | 2.8 | 0.1957 | 496 |
| 0X124 | 27459 | 506 | 99.58% | 4.22 | 0.0458 | 625 |
| 0X125 | 27459 | 450 | 99.68% | 3.4 | 0.128 | 537 |
| 0X126 | 27459 | 485 | 99.60% | 3.29 | 0.1493 | 594 |
| 0X127 | 27459 | 524 | 99.68% | 3.65 | 0.1156 | 589 |
| 0X128 | 27459 | 514 | 99.56% | 3.32 | 0.1703 | 616 |
| 0X129 | 27459 | 499 | 99.64% | 3.61 | 0.1172 | 584 |
| 0X130 | 27459 | 494 | 99.64% | 3.47 | 0.1265 | 581 |
| 0X131 | 27459 | 468 | 99.61% | 3.25 | 0.13 | 564 |
| 0X132 | 27459 | 495 | 99.65% | 3.67 | 0.1213 | 575 |
| 0X133 | 27459 | 333 | 99.73% | 3.03 | 0.1567 | 410 |
| 0X134 | 27459 | 246 | 99.73% | 2.94 | 0.1192 | 369 |
| 0X135 | 27459 | 221 | 99.76% | 2.9 | 0.0914 | 280 |
| 0X136 | 27459 | 444 | 99.73% | 4.48 | 0.0244 | 519 |
| 0X137 | 27459 | 442 | 99.75% | 4.22 | 0.0578 | 511 |
| 0X138 | 27459 | 494 | 99.77% | 4.61 | 0.03 | 544 |
| 0X139 | 27459 | 350 | 99.67% | 3.54 | 0.06 | 443 |
| 0X140 | 27459 | 518 | 99.67% | 3.58 | 0.145 | 597 |
| 0X141 | 27459 | 465 | 99.62% | 3.19 | 0.1822 | 562 |
| 0X142 | 27459 | 415 | 99.64% | 3.25 | 0.1725 | 496 |
| 0X143 | 27459 | 437 | 99.72% | 4.33 | 0.0315 | 500 |
| 0X144 | 27459 | 331 | 99.75% | 3.65 | 0.0686 | 414 |
| 0X145 | 27459 | 422 | 99.71% | 4.24 | 0.0474 | 499 |
| 0X146 | 27459 | 435 | 99.69% | 2.91 | 0.2407 | 497 |
| 0X147 | 27459 | 442 | 99.66% | 3.43 | 0.1415 | 531 |
| 0X148 | 27459 | 430 | 99.61% | 3.01 | 0.1971 | 528 |
| 0X149 | 27459 | 481 | 99.68% | 3.99 | 0.0597 | 548 |
| 0X150 | 27459 | 398 | 99.61% | 3.11 | 0.1769 | 484 |
| 0X151 | 27459 | 505 | 99.65% | 3.59 | 0.1261 | 591 |
| 0X152 | 27459 | 495 | 99.61% | 3.27 | 0.1826 | 591 |
| 0X153 | 27459 | 466 | 99.65% | 3.49 | 0.1337 | 561 |
| 0X154 | 27459 | 505 | 99.69% | 4.06 | 0.0765 | 571 |
| 0X155 | 27459 | 380 | 99.67% | 2.76 | 0.2407 | 448 |
| 0X156 | 27459 | 492 | 99.68% | 3.75 | 0.1144 | 570 |
| 0X157 | 27459 | 340 | 99.65% | 2.87 | 0.1493 | 439 |
| 0X158 | 27459 | 283 | 99.65% | 2.53 | 0.2057 | 407 |
| 0X159 | 27459 | 416 | 99.58% | 3 | 0.1777 | 523 |
| 0X160 | 27459 | 503 | 99.64% | 3.85 | 0.1054 | 608 |
| 0X161 | 27459 | 391 | 99.62% | 3.03 | 0.1685 | 482 |
| 0X162 | 27459 | 476 | 99.64% | 3.48 | 0.1396 | 563 |
| 0X163 | 27459 | 472 | 99.61% | 3.42 | 0.1156 | 568 |
| 0X164 | 27459 | 312 | 99.75% | 3.26 | 0.0958 | 367 |
| 0X165 | 27459 | 381 | 99.72% | 3.55 | 0.0708 | 440 |
| 0X166 | 27459 | 388 | 99.71% | 3.94 | 0.0458 | 478 |
| 0X167 | 27459 | 469 | 99.70% | 4.03 | 0.0623 | 528 |
| 0X168 | 27459 | 486 | 99.64% | 3.99 | 0.0544 | 570 |
| 0X169 | 27459 | 501 | 99.61% | 3.85 | 0.0882 | 606 |
| 0X170 | 27459 | 310 | 99.82% | 3.74 | 0.0605 | 347 |
| 0X171 | 27459 | 347 | 99.74% | 4.04 | 0.046 | 429 |
| 0X172 | 27459 | 355 | 99.73% | 3.83 | 0.0593 | 428 |
| 0X173 | 27459 | 444 | 99.67% | 3.81 | 0.0545 | 501 |
| 0X174 | 27459 | 476 | 99.65% | 3.93 | 0.0494 | 556 |
| 0X175 | 27459 | 501 | 99.59% | 4.1 | 0.0411 | 614 |
| 0X176 | 27459 | 733 | 99.26% | 4.21 | 0.0418 | 893 |
| 0X177 | 27459 | 410 | 99.73% | 4.13 | 0.0359 | 465 |
| 0X178 | 27459 | 411 | 99.66% | 3.64 | 0.0715 | 508 |
| 0X179 | 27459 | 203 | 99.77% | 2.77 | 0.1455 | 314 |
| 0X180 | 27459 | 249 | 99.76% | 3.16 | 0.0773 | 332 |
| 0X181 | 27459 | 386 | 99.70% | 3.4 | 0.1055 | 465 |
| 0X182 | 27459 | 265 | 99.78% | 3.1 | 0.1028 | 335 |
| 0X183 | 27459 | 262 | 99.71% | 2.4 | 0.2768 | 361 |
| 0X184 | 27459 | 366 | 99.73% | 3.41 | 0.1153 | 426 |
| 0X185 | 27459 | 444 | 99.67% | 4.03 | 0.0429 | 537 |
| 0X186 | 27459 | 465 | 99.74% | 4.48 | 0.0364 | 536 |
| 0X187 | 27459 | 403 | 99.69% | 3.98 | 0.0392 | 482 |
| 0X188 | 27459 | 400 | 99.69% | 3.86 | 0.0582 | 497 |
| 0X189 | 27459 | 339 | 99.73% | 3.46 | 0.0769 | 408 |
| 0X190 | 27459 | 433 | 99.68% | 3.9 | 0.053 | 516 |
| 0X191 | 27459 | 437 | 99.70% | 3.94 | 0.0517 | 511 |
| 0X192 | 27459 | 360 | 99.79% | 4.06 | 0.0504 | 413 |
| 0X193 | 27459 | 378 | 99.75% | 3.76 | 0.0746 | 469 |
| 0X194 | 27459 | 384 | 99.75% | 4.28 | 0.0268 | 451 |
| 0X195 | 27459 | 414 | 99.67% | 3.59 | 0.0698 | 507 |
| 0X196 | 27459 | 323 | 99.73% | 3.46 | 0.0797 | 398 |
| 0X197 | 27459 | 367 | 99.72% | 3.25 | 0.1008 | 431 |
| 0X198 | 27459 | 423 | 99.60% | 3.46 | 0.1085 | 562 |
| 0X199 | 27459 | 339 | 99.67% | 2.49 | 0.2475 | 417 |
| 0X200 | 27459 | 500 | 99.70% | 4.3 | 0.0465 | 565 |
| 0X201 | 27459 | 184 | 99.81% | 2.95 | 0.0812 | 250 |
| 0X202 | 27459 | 207 | 99.84% | 3.08 | 0.0789 | 244 |
| 0X203 | 27459 | 272 | 99.75% | 2.68 | 0.1542 | 343 |
| 0X204 | 27459 | 278 | 99.79% | 3.43 | 0.0806 | 358 |
| 0X205 | 27459 | 265 | 99.74% | 3.17 | 0.1027 | 387 |
| 0X206 | 27459 | 388 | 99.67% | 3.68 | 0.0676 | 493 |
| 0X207 | 27459 | 285 | 99.73% | 2.82 | 0.1571 | 351 |
| 0X208 | 27459 | 293 | 99.71% | 1.75 | 0.4448 | 383 |
| 0X209 | 27459 | 311 | 99.73% | 2.9 | 0.1971 | 386 |
| 0X210 | 27459 | 502 | 99.64% | 4.33 | 0.032 | 593 |
| 0X211 | 27459 | 477 | 99.64% | 3.8 | 0.0825 | 585 |
| 0X212 | 27459 | 482 | 99.70% | 4.21 | 0.0468 | 533 |
| 0X213 | 27459 | 213 | 99.80% | 2.87 | 0.1249 | 281 |
| 0X214 | 27459 | 183 | 99.81% | 2.72 | 0.127 | 236 |
| 0X215 | 27459 | 347 | 99.77% | 4.13 | 0.0377 | 450 |
| 0X216 | 27459 | 401 | 99.80% | 4.36 | 0.0276 | 446 |
| 0X217 | 27459 | 370 | 99.76% | 3.57 | 0.0782 | 414 |
| 0X218 | 27459 | 359 | 99.83% | 4 | 0.0419 | 385 |
| 0X219 | 27459 | 397 | 99.67% | 3.76 | 0.0692 | 486 |
| 0X220 | 27459 | 476 | 99.67% | 4.22 | 0.0472 | 571 |
| 0X221 | 27459 | 481 | 99.72% | 4.39 | 0.037 | 545 |
| 0X222 | 27459 | 255 | 99.75% | 3.11 | 0.0829 | 324 |
| 0X223 | 27459 | 249 | 99.75% | 2.99 | 0.107 | 333 |
| 0X224 | 27459 | 254 | 99.81% | 3.07 | 0.091 | 314 |
| 0X225 | 27459 | 424 | 99.72% | 3.33 | 0.1228 | 475 |
| 0X226 | 27459 | 335 | 99.70% | 2.72 | 0.1549 | 414 |
| 0X227 | 27459 | 364 | 99.65% | 2.88 | 0.153 | 447 |
| 0X228 | 27459 | 366 | 99.61% | 3.22 | 0.1035 | 477 |
| 0X229 | 27459 | 394 | 99.59% | 3.42 | 0.0962 | 549 |
| 0X230 | 27459 | 302 | 99.64% | 3.03 | 0.1176 | 430 |
| 0X231 | 27459 | 273 | 99.71% | 2.69 | 0.151 | 363 |
| 0X232 | 27459 | 420 | 99.67% | 3.38 | 0.1186 | 493 |
| 0X233 | 27459 | 523 | 99.65% | 3.69 | 0.1311 | 594 |
| 0X234 | 27459 | 372 | 99.59% | 3.15 | 0.1396 | 496 |
| 0X235 | 27459 | 446 | 99.62% | 3.54 | 0.0777 | 540 |
| 0X236 | 27459 | 509 | 99.64% | 3.52 | 0.1235 | 592 |
| 0X237 | 27459 | 441 | 99.68% | 4.1 | 0.0439 | 522 |
| 0X238 | 27459 | 451 | 99.66% | 4.24 | 0.0362 | 544 |
| 0X239 | 27459 | 441 | 99.58% | 3.22 | 0.1168 | 541 |
| 0X240 | 27459 | 482 | 99.73% | 3.51 | 0.1134 | 542 |
| 0X241 | 27459 | 290 | 99.61% | 2.13 | 0.2614 | 439 |
| 0X242 | 27459 | 295 | 99.63% | 2.32 | 0.2013 | 409 |
| 0X243 | 27459 | 247 | 99.67% | 2.05 | 0.2621 | 363 |
| 0X244 | 27459 | 516 | 99.61% | 3.75 | 0.0903 | 614 |
| 0X245 | 27459 | 440 | 99.62% | 3.19 | 0.1382 | 534 |
| 0X246 | 27459 | 430 | 99.73% | 4.64 | 0.0209 | 490 |
| 0X247 | 27459 | 418 | 99.76% | 4.52 | 0.0239 | 479 |
| 0X248 | 27459 | 278 | 99.75% | 3.29 | 0.0841 | 361 |
| 0X249 | 27459 | 386 | 99.76% | 3.62 | 0.0611 | 432 |
| 0X250 | 27459 | 351 | 99.72% | 3.32 | 0.1114 | 428 |
| 0X251 | 27459 | 337 | 99.72% | 3.05 | 0.1437 | 425 |
| 0X252 | 27459 | 427 | 99.61% | 2.93 | 0.2148 | 538 |
| 0X253 | 27459 | 529 | 99.63% | 4.25 | 0.0487 | 639 |
| 0X254 | 27459 | 438 | 99.56% | 3.06 | 0.1735 | 565 |
| 0X255 | 27459 | 394 | 99.81% | 4.68 | 0.0186 | 424 |
| 0X256 | 27459 | 393 | 99.75% | 4.15 | 0.0547 | 451 |
| 0X257 | 27459 | 391 | 99.77% | 4.12 | 0.0386 | 441 |
| 0X258 | 27459 | 241 | 99.71% | 2.76 | 0.1428 | 369 |
| 0X259 | 27459 | 297 | 99.69% | 3.26 | 0.0828 | 370 |
| 0X260 | 27459 | 246 | 99.71% | 1.81 | 0.3474 | 336 |
| 0X261 | 27459 | 368 | 99.65% | 2.47 | 0.2333 | 448 |
| 0X262 | 27459 | 461 | 99.60% | 3.16 | 0.1566 | 552 |
| 0X263 | 27459 | 406 | 99.68% | 3.17 | 0.1103 | 462 |
| 0X264 | 27459 | 437 | 99.68% | 3.21 | 0.1319 | 495 |
| 0X265 | 27459 | 440 | 99.63% | 3.35 | 0.1013 | 518 |
| 0X266 | 27459 | 411 | 99.62% | 3.06 | 0.1256 | 497 |
| 0X267 | 27459 | 447 | 99.70% | 3.24 | 0.125 | 494 |
| 0X268 | 27459 | 384 | 99.61% | 2.59 | 0.2017 | 487 |
| 0X269 | 27459 | 399 | 99.60% | 3.16 | 0.1359 | 508 |
| 0X270 | 27459 | 401 | 99.58% | 2.79 | 0.1522 | 510 |
| 0X271 | 27459 | 378 | 99.57% | 3 | 0.1229 | 513 |
| 0X272 | 27459 | 474 | 99.62% | 3.43 | 0.1188 | 554 |
| 0X273 | 27459 | 370 | 99.67% | 2.77 | 0.1747 | 449 |
| 0X274 | 27459 | 354 | 99.60% | 2.95 | 0.1247 | 500 |
| 0X275 | 27459 | 377 | 99.64% | 3.05 | 0.1459 | 454 |
| 0X276 | 27459 | 426 | 99.61% | 2.9 | 0.1528 | 550 |
| 0X277 | 27459 | 293 | 99.66% | 2.35 | 0.2211 | 405 |
| 0X278 | 27459 | 405 | 99.53% | 2.79 | 0.159 | 556 |
| 0X279 | 27459 | 370 | 99.64% | 2.98 | 0.1272 | 473 |
| 0X280 | 27459 | 271 | 99.66% | 2.35 | 0.2096 | 378 |
| 0X281 | 27459 | 505 | 99.71% | 3.97 | 0.0811 | 567 |
| 0X282 | 27459 | 442 | 99.59% | 3.19 | 0.1274 | 538 |
| 0X283 | 27459 | 442 | 99.61% | 3.17 | 0.1331 | 574 |
| 0X284 | 27459 | 421 | 99.61% | 3.05 | 0.1265 | 503 |
| 0X285 | 27459 | 404 | 99.56% | 3.05 | 0.1351 | 566 |
| 0X286 | 27459 | 412 | 99.60% | 2.83 | 0.1832 | 534 |
| 0X287 | 27459 | 384 | 99.66% | 3.27 | 0.1066 | 456 |
| 0X288 | 27459 | 444 | 99.65% | 3.66 | 0.0808 | 521 |
| 0X289 | 27459 | 458 | 99.64% | 3.75 | 0.055 | 546 |
| 0X290 | 27459 | 393 | 99.73% | 3.75 | 0.0626 | 455 |
| 0X291 | 27459 | 384 | 99.76% | 4.02 | 0.0425 | 444 |
| 0X292 | 27459 | 410 | 99.73% | 4.44 | 0.0229 | 471 |
| 0X293 | 27459 | 300 | 99.81% | 3.1 | 0.1231 | 339 |
| 0X294 | 27459 | 348 | 99.64% | 2.47 | 0.2338 | 453 |
| 0X295 | 27459 | 401 | 99.61% | 3.24 | 0.1158 | 527 |
| 0X296 | 27459 | 434 | 99.60% | 3.31 | 0.1194 | 565 |
| 7C1 | 27459 | 212 | 99.81% | 3.14 | 0.0949 | 283 |
| 7C2 | 27459 | 334 | 99.73% | 3.92 | 0.052 | 422 |
| 7C3 | 27459 | 295 | 99.79% | 3.48 | 0.0734 | 347 |
| 7C4 | 27459 | 483 | 99.69% | 4.37 | 0.0287 | 553 |
| 7C5 | 27459 | 451 | 99.70% | 4.34 | 0.0328 | 532 |
| 7C6 | 27459 | 472 | 99.67% | 4.34 | 0.0332 | 577 |
| 7C7 | 27459 | 426 | 99.63% | 3.93 | 0.0463 | 516 |
| 7C8 | 27459 | 370 | 99.59% | 3.79 | 0.0478 | 517 |
| 7C9 | 27459 | 315 | 99.61% | 3.72 | 0.0466 | 507 |
| 7C10 | 27459 | 421 | 99.70% | 4.13 | 0.0438 | 516 |
| 7C11 | 27459 | 526 | 99.64% | 4.34 | 0.0326 | 608 |
| 7C12 | 27459 | 396 | 99.64% | 3.63 | 0.0612 | 487 |
| 7C13 | 27459 | 468 | 99.62% | 3.77 | 0.0585 | 559 |
| 7C14 | 27459 | 482 | 99.71% | 4.2 | 0.0383 | 542 |
| 7C15 | 27459 | 369 | 99.59% | 3.11 | 0.1028 | 482 |
| 7C16 | 27459 | 513 | 99.61% | 4.26 | 0.0412 | 606 |
| 7C17 | 27459 | 559 | 99.59% | 4.61 | 0.0259 | 691 |
| 7C18 | 27459 | 405 | 99.58% | 3.7 | 0.0613 | 531 |
| 7C19 | 27459 | 505 | 99.52% | 4.03 | 0.0469 | 644 |
| 7C20 | 27459 | 524 | 99.57% | 4.11 | 0.044 | 608 |
| 7C21 | 27459 | 363 | 99.62% | 3.13 | 0.1134 | 462 |
| 7C22 | 27459 | 377 | 99.67% | 3.08 | 0.1195 | 433 |
| 7C23 | 27459 | 379 | 99.61% | 3.19 | 0.1032 | 492 |
| 7C24 | 27459 | 328 | 99.75% | 3.84 | 0.0392 | 390 |
| 7C25 | 27459 | 435 | 99.58% | 3.86 | 0.0443 | 552 |
| 7C26 | 27459 | 456 | 99.57% | 3.65 | 0.0586 | 561 |
| 7C27 | 27459 | 277 | 99.76% | 3.3 | 0.0787 | 349 |
| 7C28 | 27459 | 318 | 99.78% | 3.94 | 0.052 | 392 |
| 7C29 | 27459 | 394 | 99.69% | 3.86 | 0.0459 | 472 |
| 7C30 | 27459 | 474 | 99.78% | 4.86 | 0.0148 | 516 |
| 7C31 | 27459 | 452 | 99.69% | 4.31 | 0.0303 | 539 |
| 7C32 | 27459 | 489 | 99.71% | 4.44 | 0.0254 | 553 |
| 7C33 | 27459 | 442 | 99.71% | 4.33 | 0.0382 | 527 |
| 7C34 | 27459 | 446 | 99.67% | 4.01 | 0.0443 | 511 |
| 7C35 | 27459 | 361 | 99.65% | 3.34 | 0.0865 | 452 |
| 7C36 | 27459 | 323 | 99.72% | 3.45 | 0.0591 | 382 |
| 7C37 | 27459 | 315 | 99.69% | 3.04 | 0.1128 | 377 |
| 7C38 | 27459 | 284 | 99.77% | 3.39 | 0.09 | 368 |
| 7C39 | 27459 | 494 | 99.72% | 4.77 | 0.0213 | 599 |
| 7C40 | 27459 | 458 | 99.65% | 4.18 | 0.0661 | 559 |
| 7C41 | 27459 | 454 | 99.75% | 4.83 | 0.0156 | 516 |
| 7C42 | 27459 | 476 | 99.68% | 4.5 | 0.022 | 538 |
| 7C43 | 27459 | 429 | 99.71% | 4.32 | 0.0269 | 522 |
| 7C44 | 27459 | 485 | 99.64% | 4.29 | 0.0496 | 586 |
| 7C45 | 27459 | 525 | 99.69% | 4.62 | 0.0245 | 595 |
| 7C46 | 27459 | 440 | 99.56% | 3.69 | 0.0619 | 567 |
| 7C47 | 27459 | 490 | 99.75% | 4.87 | 0.0175 | 548 |
| 7C48 | 27459 | 344 | 99.79% | 4.02 | 0.0359 | 392 |
| 7C49 | 27459 | 362 | 99.81% | 4.31 | 0.0291 | 403 |
| 7C50 | 27459 | 346 | 99.82% | 4.37 | 0.0254 | 391 |
| 7C51 | 27459 | 513 | 99.70% | 4.67 | 0.0261 | 603 |
| 7C52 | 27459 | 516 | 99.70% | 4.49 | 0.0284 | 584 |
| 7C53 | 27459 | 475 | 99.66% | 3.65 | 0.1026 | 562 |
| 7C54 | 27459 | 323 | 99.80% | 4 | 0.0386 | 366 |
| 7C55 | 27459 | 256 | 99.78% | 2.87 | 0.1332 | 313 |
| 7C56 | 27459 | 303 | 99.73% | 3.43 | 0.0817 | 376 |
| 7C57 | 27459 | 424 | 99.77% | 4.72 | 0.0173 | 475 |
| 7C58 | 27459 | 367 | 99.76% | 4.26 | 0.0297 | 409 |
| 7C59 | 27459 | 363 | 99.80% | 4.08 | 0.035 | 408 |
| 7C60 | 27459 | 540 | 99.66% | 4.75 | 0.0229 | 624 |
| 7C61 | 27459 | 501 | 99.69% | 4.5 | 0.0372 | 573 |
| 7C62 | 27459 | 509 | 99.65% | 4.43 | 0.0379 | 583 |
| 7C63 | 27459 | 432 | 99.76% | 4.44 | 0.0303 | 506 |
| 7C64 | 27459 | 453 | 99.74% | 4.51 | 0.0226 | 508 |
| 7C65 | 27459 | 419 | 99.78% | 4.13 | 0.0517 | 458 |
| 7C66 | 27459 | 487 | 99.75% | 4.45 | 0.0437 | 542 |
| 7C67 | 27459 | 506 | 99.73% | 4.55 | 0.0244 | 565 |
| 7C68 | 27459 | 508 | 99.71% | 4.85 | 0.0173 | 572 |
| 7C69 | 27459 | 462 | 99.67% | 4.25 | 0.0388 | 555 |
| 7C70 | 27459 | 465 | 99.64% | 4.38 | 0.0293 | 581 |
| 7C71 | 27459 | 562 | 99.58% | 4.16 | 0.039 | 646 |
| 7C72 | 27459 | 479 | 99.67% | 4.28 | 0.0439 | 572 |
| 7C73 | 27459 | 457 | 99.73% | 4.72 | 0.0164 | 519 |
| 7C74 | 27459 | 489 | 99.64% | 4.68 | 0.0199 | 610 |
| 7C75 | 27459 | 421 | 99.73% | 4.09 | 0.0516 | 482 |
| 7C76 | 27459 | 392 | 99.69% | 4.11 | 0.0346 | 494 |
| 7C77 | 27459 | 426 | 99.71% | 4.13 | 0.0433 | 499 |
| 7C78 | 27459 | 380 | 99.61% | 2.52 | 0.2327 | 503 |
| 7C79 | 27459 | 491 | 99.66% | 3.37 | 0.1746 | 575 |
| 7C80 | 27459 | 301 | 99.71% | 2.76 | 0.1972 | 391 |
| 7C81 | 27459 | 496 | 99.70% | 4.14 | 0.0725 | 565 |
| 7C82 | 27459 | 479 | 99.69% | 3.84 | 0.0989 | 541 |
| 7C83 | 27459 | 478 | 99.70% | 3.43 | 0.1578 | 538 |
| 7C84 | 27459 | 472 | 99.71% | 4.07 | 0.0619 | 540 |
| 7C85 | 27459 | 488 | 99.67% | 3.99 | 0.0788 | 601 |
| 7C86 | 27459 | 416 | 99.78% | 4.47 | 0.0347 | 461 |
| 7C87 | 27459 | 317 | 99.71% | 3.18 | 0.0889 | 374 |
| 7C88 | 27459 | 434 | 99.76% | 4.42 | 0.0294 | 487 |
| 7C89 | 27459 | 518 | 99.76% | 4.52 | 0.0349 | 567 |
| 7C90 | 27459 | 510 | 99.74% | 4.78 | 0.0183 | 561 |
| 7C91 | 27459 | 515 | 99.69% | 4.7 | 0.0222 | 602 |
| 7C92 | 27459 | 407 | 99.69% | 3.42 | 0.1037 | 473 |
| 7C93 | 27459 | 441 | 99.75% | 4.03 | 0.0499 | 501 |
| 7C94 | 27459 | 366 | 99.66% | 2.93 | 0.1668 | 452 |
| 7C95 | 27459 | 453 | 99.68% | 3.52 | 0.1324 | 533 |
| 7C96 | 27459 | 421 | 99.72% | 3.29 | 0.1159 | 474 |
| 7C97 | 27459 | 396 | 99.65% | 3.17 | 0.1361 | 470 |
| 7C98 | 27459 | 366 | 99.66% | 3.06 | 0.1704 | 473 |
| 7C99 | 27459 | 487 | 99.72% | 4.67 | 0.0202 | 549 |
| 7C100 | 27459 | 417 | 99.65% | 3.05 | 0.1319 | 510 |
| 7C101 | 27459 | 343 | 99.67% | 2.9 | 0.155 | 453 |
| 7C102 | 27459 | 364 | 99.71% | 3.14 | 0.1144 | 422 |
| 7C103 | 27459 | 453 | 99.67% | 3.67 | 0.0679 | 528 |
| 7C104 | 27459 | 368 | 99.66% | 2.94 | 0.1356 | 449 |
| 7C105 | 27459 | 357 | 99.71% | 3.01 | 0.1375 | 419 |
| 7C106 | 27459 | 392 | 99.67% | 3.26 | 0.1076 | 481 |
| 7C107 | 27459 | 346 | 99.69% | 3.76 | 0.0476 | 427 |
| 7C108 | 27459 | 442 | 99.65% | 3.8 | 0.0587 | 530 |
| 7C109 | 27459 | 534 | 99.66% | 4.55 | 0.024 | 599 |
| 7C110 | 27459 | 516 | 99.68% | 4.89 | 0.0159 | 631 |
| 7C111 | 27459 | 373 | 99.65% | 2.5 | 0.2962 | 464 |
| 7C112 | 27459 | 341 | 99.68% | 3.39 | 0.0751 | 445 |
| 7C113 | 27459 | 402 | 99.63% | 2.43 | 0.2873 | 505 |
| 7C114 | 27459 | 392 | 99.61% | 2.82 | 0.227 | 518 |
| 7C115 | 27459 | 225 | 99.78% | 2.36 | 0.1801 | 272 |
| 7C116 | 27459 | 215 | 99.75% | 2.34 | 0.2287 | 284 |
| 7C117 | 27459 | 180 | 99.80% | 1.94 | 0.3009 | 242 |
| 7C118 | 27459 | 334 | 99.58% | 2.52 | 0.2554 | 493 |
| 7C119 | 27459 | 242 | 99.73% | 1.89 | 0.3606 | 306 |
| 7C120 | 27459 | 249 | 99.69% | 1.75 | 0.4487 | 338 |
| 7C121 | 27459 | 276 | 99.62% | 2.51 | 0.1406 | 400 |
| 7C122 | 27459 | 499 | 99.64% | 4.45 | 0.0287 | 580 |
| 7C123 | 27459 | 439 | 99.67% | 4.12 | 0.0421 | 524 |
| 7C124 | 27459 | 462 | 99.66% | 4.18 | 0.0429 | 548 |
| 7C125 | 27459 | 382 | 99.65% | 3.95 | 0.0428 | 481 |
| 7C126 | 27459 | 294 | 99.72% | 3.45 | 0.0731 | 395 |
| 7C127 | 27459 | 343 | 99.68% | 2.78 | 0.2597 | 437 |
| 7C128 | 27459 | 129 | 99.85% | 1.53 | 0.4135 | 174 |
| 7C129 | 27459 | 162 | 99.81% | 1.71 | 0.4116 | 228 |
| 7C130 | 27459 | 435 | 99.72% | 3.63 | 0.0876 | 487 |
| 7C131 | 27459 | 461 | 99.65% | 3.82 | 0.051 | 535 |
| 7C132 | 27459 | 299 | 99.67% | 2.78 | 0.1432 | 401 |
| 7C133 | 27459 | 350 | 99.73% | 3.6 | 0.0969 | 432 |
| 7C134 | 27459 | 336 | 99.76% | 4.14 | 0.0294 | 396 |
| 7C135 | 27459 | 337 | 99.73% | 4.13 | 0.0272 | 430 |
| 7C136 | 27459 | 440 | 99.73% | 4.57 | 0.0225 | 519 |
| 7C137 | 27459 | 421 | 99.77% | 4.39 | 0.0232 | 458 |
| 7C138 | 27459 | 437 | 99.79% | 4.57 | 0.0196 | 483 |
| 7C139 | 27459 | 359 | 99.74% | 3.62 | 0.0576 | 423 |
| 7C140 | 27459 | 393 | 99.80% | 4.12 | 0.0412 | 431 |
| 7C141 | 27459 | 427 | 99.81% | 4.74 | 0.0169 | 487 |
| 7C142 | 27459 | 376 | 99.62% | 3.17 | 0.1011 | 483 |
| 7C143 | 27459 | 413 | 99.63% | 3.52 | 0.0663 | 508 |
| 7C144 | 27459 | 344 | 99.72% | 3.41 | 0.0703 | 408 |
| 7C145 | 27459 | 349 | 99.71% | 3.88 | 0.0393 | 437 |
| 7C146 | 27459 | 449 | 99.77% | 4.52 | 0.0248 | 499 |
| 7C147 | 27459 | 458 | 99.74% | 4.3 | 0.0338 | 515 |
| 7C148 | 27459 | 423 | 99.62% | 3.39 | 0.1308 | 520 |
| 7C149 | 27459 | 462 | 99.63% | 3.4 | 0.1165 | 549 |
| 7C150 | 27459 | 374 | 99.61% | 3.32 | 0.0761 | 467 |
| 7C151 | 27459 | 379 | 99.70% | 3.46 | 0.0642 | 444 |
| 7C152 | 27459 | 404 | 99.67% | 3.5 | 0.067 | 464 |
| 7C153 | 27459 | 310 | 99.68% | 2.88 | 0.1558 | 401 |
| 7C154 | 27459 | 462 | 99.69% | 3.7 | 0.084 | 543 |
| 7C155 | 27459 | 394 | 99.72% | 3.2 | 0.1243 | 444 |
| 7C156 | 27459 | 327 | 99.68% | 2.53 | 0.2076 | 401 |
| 7C157 | 27459 | 514 | 99.73% | 4.72 | 0.0192 | 581 |
| 7C158 | 27459 | 488 | 99.63% | 4.19 | 0.0334 | 566 |
| 7C159 | 27459 | 531 | 99.75% | 4.79 | 0.0171 | 570 |
| 7C160 | 27459 | 205 | 99.75% | 2.09 | 0.2437 | 272 |
| 7C161 | 27459 | 278 | 99.66% | 2 | 0.3241 | 408 |
| 7C162 | 27459 | 221 | 99.76% | 2.44 | 0.1967 | 301 |
| 7C163 | 27459 | 254 | 99.72% | 2.78 | 0.1401 | 343 |
| 7C164 | 27459 | 326 | 99.65% | 2.56 | 0.2666 | 417 |
| 7C165 | 27459 | 296 | 99.63% | 2.16 | 0.3023 | 448 |
| 7C166 | 27459 | 363 | 99.72% | 3.99 | 0.0411 | 455 |
| 7C167 | 27459 | 397 | 99.78% | 3.88 | 0.0545 | 445 |
| 7C168 | 27459 | 318 | 99.71% | 3.48 | 0.0655 | 403 |
| 7C169 | 27459 | 400 | 99.54% | 2.97 | 0.154 | 536 |
| 7C170 | 27459 | 489 | 99.61% | 3.92 | 0.0645 | 583 |
| 7C171 | 27459 | 492 | 99.69% | 3.58 | 0.1361 | 545 |
| 7C172 | 27459 | 284 | 99.71% | 2.87 | 0.1386 | 361 |
| 7C173 | 27459 | 298 | 99.67% | 2.72 | 0.162 | 377 |
| 7C174 | 27459 | 334 | 99.68% | 3.47 | 0.0712 | 444 |
| 7C175 | 27459 | 436 | 99.70% | 4.08 | 0.0425 | 526 |
| 7C176 | 27459 | 514 | 99.69% | 4.5 | 0.0238 | 595 |
| 7C177 | 27459 | 414 | 99.71% | 4.07 | 0.0399 | 473 |
| 7C178 | 27459 | 477 | 99.65% | 4.6 | 0.0205 | 578 |
| 7C179 | 27459 | 423 | 99.65% | 4.08 | 0.0381 | 524 |
| 7C180 | 27459 | 344 | 99.72% | 2.86 | 0.1734 | 421 |
| 7C181 | 27459 | 294 | 99.79% | 2.38 | 0.2557 | 335 |
| 7C182 | 27459 | 325 | 99.76% | 3.29 | 0.1022 | 376 |
| 7C183 | 27459 | 356 | 99.79% | 3.75 | 0.0745 | 405 |
| 7C184 | 27459 | 380 | 99.73% | 3.76 | 0.0573 | 443 |
| 7C185 | 27459 | 328 | 99.73% | 3.75 | 0.0419 | 391 |
| 7C186 | 27459 | 464 | 99.73% | 4.61 | 0.0189 | 522 |
| 7C187 | 27459 | 430 | 99.75% | 4.71 | 0.0165 | 513 |
| 7C188 | 27459 | 422 | 99.68% | 3.88 | 0.0639 | 513 |
| 7C189 | 27459 | 442 | 99.75% | 4.55 | 0.023 | 486 |
| 7C190 | 27459 | 300 | 99.87% | 3.97 | 0.0504 | 317 |
| 7C191 | 27459 | 414 | 99.78% | 4.16 | 0.0455 | 459 |
| 7C192 | 27459 | 348 | 99.76% | 3.76 | 0.0553 | 408 |
| 7C193 | 27459 | 362 | 99.77% | 3.9 | 0.0474 | 395 |
| 7C194 | 27459 | 439 | 99.67% | 3.92 | 0.0455 | 532 |
| 7C195 | 27459 | 386 | 99.53% | 3.45 | 0.0823 | 571 |
| 7C196 | 27459 | 327 | 99.75% | 3.2 | 0.1159 | 378 |
| 7C197 | 27459 | 279 | 99.71% | 3.45 | 0.071 | 450 |
| 7C198 | 27459 | 356 | 99.71% | 3.58 | 0.0667 | 447 |
| 7C199 | 27459 | 391 | 99.67% | 3.55 | 0.0698 | 466 |
| 7C200 | 27459 | 302 | 99.67% | 3.24 | 0.0843 | 387 |
| 7C201 | 27459 | 332 | 99.66% | 2.57 | 0.2482 | 414 |
| 7C202 | 27459 | 458 | 99.68% | 3.46 | 0.113 | 529 |
| 7C203 | 27459 | 384 | 99.66% | 2.85 | 0.1821 | 448 |
| 7C204 | 27459 | 382 | 99.73% | 3.84 | 0.0572 | 453 |
| 7C205 | 27459 | 363 | 99.81% | 4.19 | 0.0336 | 426 |
| 7C206 | 27459 | 382 | 99.83% | 3.97 | 0.0539 | 410 |
| 7C207 | 27459 | 371 | 99.70% | 3.37 | 0.0968 | 434 |
| 7C208 | 27459 | 245 | 99.79% | 3.28 | 0.1062 | 314 |
| 7C209 | 27459 | 439 | 99.61% | 3.62 | 0.0758 | 529 |
| 7C210 | 27459 | 441 | 99.71% | 4.8 | 0.0157 | 526 |
| 7C211 | 27459 | 465 | 99.54% | 4.06 | 0.052 | 659 |
| 7C212 | 27459 | 443 | 99.71% | 4.46 | 0.0304 | 522 |
| 7C213 | 27459 | 441 | 99.70% | 3.62 | 0.075 | 499 |
| 7C214 | 27459 | 305 | 99.74% | 2.96 | 0.095 | 356 |
| 7C215 | 27459 | 450 | 99.67% | 3.9 | 0.0491 | 532 |
| 7C216 | 27459 | 378 | 99.73% | 3.91 | 0.0582 | 453 |
| 7C217 | 27459 | 374 | 99.73% | 3 | 0.2068 | 436 |
| 7C218 | 27459 | 411 | 99.62% | 4.02 | 0.0527 | 546 |
| 7C219 | 27459 | 268 | 99.78% | 3.1 | 0.0967 | 336 |
| 7C220 | 27459 | 289 | 99.82% | 3.81 | 0.0427 | 325 |
| 7C221 | 27459 | 352 | 99.73% | 4.1 | 0.0448 | 445 |
| 7C222 | 27459 | 471 | 99.61% | 3.42 | 0.1084 | 567 |
| 7C223 | 27459 | 423 | 99.67% | 3.67 | 0.0624 | 498 |
| 7C224 | 27459 | 414 | 99.66% | 3.42 | 0.0771 | 488 |
| 7C225 | 27459 | 286 | 99.77% | 3.31 | 0.0788 | 359 |
| 7C226 | 27459 | 275 | 99.75% | 3.21 | 0.0826 | 359 |
| 7C227 | 27459 | 278 | 99.82% | 3.5 | 0.0621 | 318 |
| 7C228 | 27459 | 420 | 99.58% | 3.36 | 0.0847 | 559 |
| 7C229 | 27459 | 325 | 99.69% | 3.56 | 0.0649 | 421 |
| 7C230 | 27459 | 299 | 99.70% | 3.47 | 0.068 | 380 |
| 7C231 | 27459 | 417 | 99.71% | 4.02 | 0.0396 | 477 |
| 7C232 | 27459 | 463 | 99.54% | 4.19 | 0.0283 | 594 |
| 7C233 | 27459 | 201 | 99.76% | 3.34 | 0.0654 | 335 |
| 7C234 | 27459 | 283 | 99.65% | 2.88 | 0.1097 | 387 |
| 7C235 | 27459 | 321 | 99.60% | 2.76 | 0.1373 | 479 |
| 7C236 | 27459 | 402 | 99.73% | 3.47 | 0.0834 | 452 |
| 7C237 | 27459 | 346 | 99.70% | 2.89 | 0.1288 | 415 |
| 7C238 | 27459 | 423 | 99.61% | 3.33 | 0.1171 | 519 |
| 7C239 | 27459 | 467 | 99.65% | 3.9 | 0.056 | 547 |
| 7C240 | 27459 | 449 | 99.68% | 4.3 | 0.0296 | 536 |
| 7C241 | 27459 | 467 | 99.70% | 4.63 | 0.0205 | 536 |
| 7C242 | 27459 | 425 | 99.60% | 3.7 | 0.078 | 525 |
| 7C243 | 27459 | 476 | 99.70% | 4.29 | 0.0388 | 551 |
| 7C244 | 27459 | 426 | 99.57% | 3.52 | 0.0816 | 608 |
| 7C245 | 27459 | 460 | 99.60% | 3.18 | 0.1733 | 560 |
| 7C246 | 27459 | 383 | 99.64% | 2.72 | 0.1799 | 463 |
| 7C247 | 27459 | 489 | 99.67% | 4.2 | 0.0543 | 573 |
| 7C248 | 27459 | 504 | 99.63% | 4.11 | 0.0502 | 607 |
| 7C249 | 27459 | 356 | 99.72% | 3.34 | 0.1005 | 415 |
| 7C250 | 27459 | 371 | 99.75% | 3.75 | 0.0663 | 433 |
| 7C251 | 27459 | 352 | 99.79% | 4.15 | 0.0314 | 387 |
| 7C252 | 27459 | 343 | 99.76% | 3.87 | 0.045 | 396 |
| 7C253 | 27459 | 364 | 99.75% | 4.11 | 0.0324 | 416 |
| 7C254 | 27459 | 360 | 99.78% | 4.33 | 0.0286 | 423 |
| 7C255 | 27459 | 431 | 99.69% | 4.05 | 0.0514 | 516 |
| 7C256 | 27459 | 449 | 99.71% | 4.2 | 0.0369 | 515 |
| 7C257 | 27459 | 416 | 99.63% | 3.15 | 0.1318 | 506 |
| 7C258 | 27459 | 386 | 99.72% | 4.04 | 0.0376 | 447 |
| 7C259 | 27459 | 302 | 99.78% | 4.02 | 0.0349 | 370 |
| 7C260 | 27459 | 290 | 99.81% | 3.81 | 0.0572 | 330 |
| 7C261 | 27459 | 360 | 99.73% | 3.77 | 0.0649 | 442 |
| 7C262 | 27459 | 257 | 99.79% | 3.4 | 0.0829 | 323 |
| 7C263 | 27459 | 225 | 99.83% | 3.58 | 0.0598 | 289 |
| 7C264 | 27459 | 352 | 99.74% | 3.53 | 0.0892 | 432 |
| 7C265 | 27459 | 411 | 99.64% | 3.3 | 0.1084 | 516 |
| 7C266 | 27459 | 258 | 99.69% | 2.2 | 0.2672 | 331 |
| 7C267 | 27459 | 408 | 99.74% | 4.07 | 0.0371 | 455 |
| 7C268 | 27459 | 392 | 99.71% | 3.06 | 0.1117 | 448 |
| 7C269 | 27459 | 476 | 99.74% | 4.57 | 0.0244 | 530 |
| 7C270 | 27459 | 340 | 99.61% | 2.91 | 0.1552 | 466 |
| 7C271 | 27459 | 500 | 99.63% | 3.7 | 0.1138 | 605 |
| 7C272 | 27459 | 483 | 99.71% | 4.09 | 0.0568 | 540 |
| 7C273 | 27459 | 518 | 99.65% | 3.79 | 0.1193 | 611 |
| 7C274 | 27459 | 381 | 99.69% | 3.41 | 0.103 | 448 |
| 7C275 | 27459 | 436 | 99.61% | 3.01 | 0.1751 | 541 |
| 7C276 | 27459 | 358 | 99.70% | 3.29 | 0.1075 | 418 |
| 7C277 | 27459 | 419 | 99.62% | 3.69 | 0.0624 | 540 |
| 7C278 | 27459 | 428 | 99.69% | 3.69 | 0.0768 | 498 |
| 7C279 | 27459 | 440 | 99.67% | 3.64 | 0.0819 | 520 |
| 7C280 | 27459 | 510 | 99.69% | 3.93 | 0.0945 | 577 |
| 7C281 | 27459 | 324 | 99.69% | 2.81 | 0.2017 | 426 |
| 7C282 | 27459 | 414 | 99.63% | 3.69 | 0.0636 | 519 |
| 7C283 | 27459 | 344 | 99.58% | 2.56 | 0.1881 | 475 |
| 7C284 | 27459 | 436 | 99.64% | 3.63 | 0.069 | 528 |
| 7C285 | 27459 | 422 | 99.71% | 3.68 | 0.0792 | 473 |
| 7C286 | 27459 | 199 | 99.77% | 2.18 | 0.2476 | 274 |
| 7C287 | 27459 | 336 | 99.54% | 2.91 | 0.1175 | 494 |
| 7C288 | 27459 | 204 | 99.75% | 2.37 | 0.1946 | 277 |
| 7C289 | 27459 | 422 | 99.64% | 2.99 | 0.1872 | 510 |
| 7C290 | 27459 | 483 | 99.61% | 3.28 | 0.1675 | 573 |
| 7C291 | 27459 | 461 | 99.61% | 3.8 | 0.0693 | 551 |
| 7C292 | 27459 | 477 | 99.56% | 4 | 0.0426 | 600 |
| 7C293 | 27459 | 417 | 99.63% | 3.67 | 0.0592 | 514 |
| 7C294 | 27459 | 202 | 99.75% | 2.27 | 0.1896 | 288 |
| 7C295 | 27459 | 190 | 99.83% | 2.56 | 0.1838 | 230 |
| 7C296 | 27459 | 270 | 99.74% | 2.56 | 0.2113 | 356 |
| 7C297 | 27459 | 466 | 99.73% | 4.7 | 0.0187 | 539 |
| 7C298 | 27459 | 419 | 99.69% | 4.07 | 0.0466 | 497 |
| 7C299 | 27459 | 522 | 99.66% | 4.57 | 0.0256 | 604 |
| 7C300 | 27459 | 464 | 99.65% | 4.58 | 0.0206 | 582 |
| 7X1 | 27459 | 330 | 99.71% | 3.39 | 0.1032 | 423 |
| 7X2 | 27459 | 259 | 99.71% | 3.03 | 0.0802 | 355 |
| 7X3 | 27459 | 366 | 99.73% | 3.4 | 0.084 | 419 |
| 7X4 | 27459 | 318 | 99.64% | 2.47 | 0.1476 | 398 |
| 7X5 | 27459 | 481 | 99.63% | 3.87 | 0.0568 | 573 |
| 7X6 | 27459 | 421 | 99.75% | 4.39 | 0.0292 | 470 |
| 7X7 | 27459 | 431 | 99.60% | 3.67 | 0.0933 | 562 |
| 7X8 | 27459 | 408 | 99.67% | 3.95 | 0.064 | 528 |
| 7X9 | 27459 | 328 | 99.66% | 3.25 | 0.1177 | 430 |
| 7X10 | 27459 | 455 | 99.62% | 3.78 | 0.0633 | 556 |
| 7X11 | 27459 | 375 | 99.69% | 2.98 | 0.1061 | 431 |
| 7X12 | 27459 | 387 | 99.62% | 3.12 | 0.1484 | 496 |
| 7X13 | 27459 | 530 | 99.62% | 4.02 | 0.0579 | 635 |
| 7X14 | 27459 | 419 | 99.68% | 3.29 | 0.1022 | 490 |
| 7X15 | 27459 | 435 | 99.69% | 3.34 | 0.1006 | 484 |
| 7X16 | 27459 | 449 | 99.67% | 3.24 | 0.1131 | 519 |
| 7X17 | 27459 | 421 | 99.68% | 3.73 | 0.0627 | 506 |
| 7X18 | 27459 | 413 | 99.63% | 3.32 | 0.0903 | 516 |
| 7X19 | 27459 | 369 | 99.62% | 3.29 | 0.0842 | 462 |
| 7X20 | 27459 | 466 | 99.68% | 4.13 | 0.0414 | 534 |
| 7X21 | 27459 | 503 | 99.47% | 3.79 | 0.0599 | 677 |
| 7X22 | 27459 | 313 | 99.68% | 2.29 | 0.3185 | 414 |
| 7X23 | 27459 | 392 | 99.73% | 3.72 | 0.0656 | 458 |
| 7X24 | 27459 | 339 | 99.81% | 4.15 | 0.0348 | 381 |
| 7X25 | 27459 | 386 | 99.59% | 3.35 | 0.0828 | 513 |
| 7X26 | 27459 | 524 | 99.70% | 4.63 | 0.0318 | 619 |
| 7X27 | 27459 | 521 | 99.65% | 4.5 | 0.0376 | 638 |
| 7X28 | 27459 | 426 | 99.64% | 4.02 | 0.0435 | 527 |
| 7X29 | 27459 | 510 | 99.72% | 4.41 | 0.0364 | 564 |
| 7X30 | 27459 | 463 | 99.68% | 4.1 | 0.0559 | 546 |
| 7X31 | 27459 | 379 | 99.70% | 3.79 | 0.0652 | 482 |
| 7X32 | 27459 | 393 | 99.63% | 3.66 | 0.0646 | 503 |
| 7X33 | 27459 | 353 | 99.72% | 3.83 | 0.0455 | 434 |
| 7X34 | 27459 | 431 | 99.71% | 4.06 | 0.0632 | 512 |
| 7X35 | 27459 | 443 | 99.71% | 4.1 | 0.0504 | 492 |
| 7X36 | 27459 | 434 | 99.75% | 4.45 | 0.0256 | 478 |
| 7X37 | 27459 | 363 | 99.72% | 3.83 | 0.0661 | 444 |
| 7X38 | 27459 | 482 | 99.64% | 4.48 | 0.0269 | 590 |
| 7X39 | 27459 | 419 | 99.71% | 4.18 | 0.0457 | 498 |
| 7X40 | 27459 | 452 | 99.66% | 3.83 | 0.0668 | 525 |
| 7X41 | 27459 | 427 | 99.64% | 3.55 | 0.0754 | 535 |
| 7X42 | 27459 | 462 | 99.73% | 4.2 | 0.0376 | 509 |
| 7X43 | 27459 | 454 | 99.65% | 4.31 | 0.029 | 543 |
| 7X44 | 27459 | 433 | 99.67% | 4.03 | 0.0429 | 513 |
| 7X45 | 27459 | 423 | 99.75% | 4.34 | 0.0276 | 476 |
| 7X46 | 27459 | 459 | 99.68% | 3.65 | 0.0774 | 525 |
| 7X47 | 27459 | 499 | 99.69% | 4.09 | 0.0625 | 578 |
| 7X48 | 27459 | 451 | 99.59% | 3.69 | 0.0637 | 575 |
| 7X49 | 27459 | 366 | 99.77% | 3.6 | 0.08 | 431 |
| 7X50 | 27459 | 330 | 99.80% | 4.02 | 0.048 | 395 |
| 7X51 | 27459 | 264 | 99.75% | 2.72 | 0.1536 | 318 |
| 7X52 | 27459 | 308 | 99.79% | 3.11 | 0.1217 | 363 |
| 7X53 | 27459 | 304 | 99.75% | 3.08 | 0.1254 | 379 |
| 7X54 | 27459 | 312 | 99.72% | 2.67 | 0.206 | 370 |
| 7X55 | 27459 | 480 | 99.69% | 3.75 | 0.086 | 549 |
| 7X56 | 27459 | 351 | 99.66% | 3.14 | 0.101 | 438 |
| 7X57 | 27459 | 458 | 99.67% | 4.35 | 0.0288 | 542 |
| 7X58 | 27459 | 420 | 99.80% | 4.41 | 0.0227 | 456 |
| 7X59 | 27459 | 308 | 99.74% | 2.29 | 0.2884 | 390 |
| 7X60 | 27459 | 257 | 99.75% | 2.77 | 0.1568 | 319 |
| 7X61 | 27459 | 350 | 99.66% | 2.91 | 0.1364 | 441 |
| 7X62 | 27459 | 451 | 99.64% | 3.75 | 0.0621 | 539 |
| 7X63 | 27459 | 450 | 99.69% | 4.6 | 0.0213 | 555 |
| 7X64 | 27459 | 415 | 99.75% | 4.42 | 0.0236 | 468 |
| 7X65 | 27459 | 438 | 99.73% | 4.65 | 0.0202 | 513 |
| 7X66 | 27459 | 491 | 99.63% | 4.4 | 0.0277 | 601 |
| 7X67 | 27459 | 442 | 99.56% | 4.04 | 0.0363 | 615 |
| 7X68 | 27459 | 495 | 99.75% | 4.73 | 0.0187 | 551 |
| 7X69 | 27459 | 439 | 99.58% | 3.43 | 0.0795 | 540 |
| 7X70 | 27459 | 399 | 99.62% | 3.2 | 0.1052 | 489 |
| 7X71 | 27459 | 417 | 99.64% | 3.58 | 0.0692 | 522 |
| 7X72 | 27459 | 460 | 99.62% | 3.71 | 0.0644 | 549 |
| 7X73 | 27459 | 467 | 99.67% | 3.99 | 0.0551 | 552 |
| 7X74 | 27459 | 382 | 99.72% | 3.56 | 0.0659 | 438 |
| 7X75 | 27459 | 468 | 99.70% | 4.24 | 0.0376 | 540 |
| 7X76 | 27459 | 445 | 99.76% | 4.21 | 0.04 | 493 |
| 7X77 | 27459 | 428 | 99.70% | 3.85 | 0.0593 | 495 |
| 7X78 | 27459 | 448 | 99.68% | 3.93 | 0.0516 | 523 |
| 7X79 | 27459 | 410 | 99.68% | 3.38 | 0.087 | 476 |
| 7X80 | 27459 | 401 | 99.65% | 3.64 | 0.0616 | 485 |
| 7X81 | 27459 | 426 | 99.71% | 3.82 | 0.076 | 488 |
| 7X82 | 27459 | 428 | 99.60% | 3.57 | 0.0896 | 558 |
| 7X83 | 27459 | 478 | 99.68% | 4.01 | 0.0527 | 549 |
| 7X84 | 27459 | 462 | 99.58% | 3.63 | 0.077 | 568 |
| 7X85 | 27459 | 379 | 99.63% | 3.07 | 0.1218 | 473 |
| 7X86 | 27459 | 466 | 99.65% | 3.59 | 0.0858 | 563 |
| 7X87 | 27459 | 443 | 99.66% | 3.6 | 0.0815 | 511 |
| 7X88 | 27459 | 463 | 99.62% | 3.72 | 0.0659 | 546 |
| 7X89 | 27459 | 453 | 99.69% | 4.38 | 0.0274 | 579 |
| 7X90 | 27459 | 348 | 99.73% | 3.67 | 0.0683 | 425 |
| 7X91 | 27459 | 346 | 99.77% | 3.84 | 0.0493 | 394 |
| 7X92 | 27459 | 421 | 99.71% | 4.03 | 0.0467 | 483 |
| 7X93 | 27459 | 487 | 99.69% | 4.4 | 0.0299 | 550 |
| 7X94 | 27459 | 532 | 99.69% | 4.78 | 0.0181 | 631 |
| 7X95 | 27459 | 436 | 99.71% | 4.12 | 0.0363 | 501 |
| 7X96 | 27459 | 391 | 99.64% | 3.31 | 0.0951 | 470 |
| 7X97 | 27459 | 396 | 99.63% | 3.17 | 0.1045 | 488 |
| 7X98 | 27459 | 479 | 99.65% | 3.96 | 0.0504 | 559 |
| 7X99 | 27459 | 510 | 99.69% | 4.2 | 0.0476 | 574 |
| 7X100 | 27459 | 511 | 99.67% | 4.39 | 0.0463 | 619 |
| 7X101 | 27459 | 361 | 99.80% | 3.65 | 0.092 | 391 |
| 7X102 | 27459 | 507 | 99.73% | 4.47 | 0.041 | 578 |
| 7X103 | 27459 | 443 | 99.61% | 3.73 | 0.0782 | 559 |
| 7X104 | 27459 | 468 | 99.60% | 3.48 | 0.1267 | 593 |
| 7X105 | 27459 | 417 | 99.57% | 3.1 | 0.1837 | 545 |
| 7X106 | 27459 | 374 | 99.64% | 2.88 | 0.1158 | 461 |
| 7X107 | 27459 | 343 | 99.68% | 2.83 | 0.172 | 439 |
| 7X108 | 27459 | 417 | 99.63% | 3.13 | 0.1493 | 507 |
| 7X109 | 27459 | 413 | 99.60% | 3.42 | 0.1049 | 538 |
| 7X110 | 27459 | 501 | 99.67% | 3.59 | 0.0971 | 577 |
| 7X111 | 27459 | 364 | 99.69% | 3.76 | 0.0516 | 458 |
| 7X112 | 27459 | 308 | 99.65% | 3.63 | 0.0523 | 420 |
| 7X113 | 27459 | 295 | 99.75% | 3.52 | 0.0597 | 353 |
| 7X114 | 27459 | 432 | 99.58% | 3.39 | 0.0814 | 549 |
| 7X115 | 27459 | 507 | 99.65% | 4.3 | 0.0376 | 587 |
| 7X116 | 27459 | 514 | 99.65% | 4.49 | 0.0263 | 590 |
| 7X117 | 27459 | 457 | 99.62% | 3.4 | 0.1104 | 571 |
| 7X118 | 27459 | 404 | 99.58% | 3.28 | 0.0884 | 523 |
| 7X119 | 27459 | 513 | 99.68% | 4.45 | 0.0385 | 590 |
| 7X120 | 27459 | 470 | 99.65% | 3.71 | 0.0815 | 550 |
| 7X121 | 27459 | 481 | 99.61% | 4.12 | 0.0476 | 580 |
| 7X122 | 27459 | 485 | 99.65% | 3.57 | 0.1254 | 558 |
| 7X123 | 27459 | 470 | 99.65% | 3.42 | 0.1424 | 556 |
| 7X124 | 27459 | 391 | 99.59% | 2.73 | 0.2028 | 508 |
| 7X125 | 27459 | 501 | 99.64% | 3.77 | 0.0924 | 580 |
| 7X126 | 27459 | 493 | 99.64% | 3.57 | 0.119 | 574 |
| 7X127 | 27459 | 518 | 99.63% | 3.68 | 0.1175 | 619 |
| 7X128 | 27459 | 391 | 99.56% | 2.54 | 0.2787 | 539 |
| 7X129 | 27459 | 451 | 99.60% | 3.4 | 0.123 | 549 |
| 7X130 | 27459 | 458 | 99.60% | 3.17 | 0.1507 | 556 |
| 7X131 | 27459 | 408 | 99.62% | 3.14 | 0.1269 | 499 |
| 7X132 | 27459 | 351 | 99.65% | 3.39 | 0.0753 | 442 |
| 7X133 | 27459 | 303 | 99.71% | 3.36 | 0.0904 | 409 |
| 7X134 | 27459 | 400 | 99.68% | 4.1 | 0.0373 | 487 |
| 7X135 | 27459 | 447 | 99.72% | 4.6 | 0.0191 | 526 |
| 7X136 | 27459 | 441 | 99.75% | 4.39 | 0.029 | 478 |
| 7X137 | 27459 | 494 | 99.77% | 4.61 | 0.0291 | 535 |
| 7X138 | 27459 | 392 | 99.72% | 3.82 | 0.0498 | 450 |
| 7X139 | 27459 | 502 | 99.61% | 3.48 | 0.1353 | 587 |
| 7X140 | 27459 | 507 | 99.64% | 3.52 | 0.1542 | 600 |
| 7X141 | 27459 | 306 | 99.67% | 3.03 | 0.1137 | 413 |
| 7X142 | 27459 | 443 | 99.75% | 4.46 | 0.0289 | 503 |
| 7X143 | 27459 | 340 | 99.79% | 3.76 | 0.0645 | 401 |
| 7X144 | 27459 | 415 | 99.67% | 3.98 | 0.0544 | 510 |
| 7X145 | 27459 | 457 | 99.61% | 3.62 | 0.1204 | 573 |
| 7X146 | 27459 | 460 | 99.63% | 3.32 | 0.1495 | 552 |
| 7X147 | 27459 | 389 | 99.58% | 2.74 | 0.1323 | 529 |
| 7X148 | 27459 | 414 | 99.62% | 3.4 | 0.1176 | 513 |
| 7X149 | 27459 | 455 | 99.62% | 3.31 | 0.1634 | 554 |
| 7X150 | 27459 | 487 | 99.68% | 3.7 | 0.111 | 558 |
| 7X151 | 27459 | 483 | 99.67% | 3.45 | 0.1666 | 552 |
| 7X152 | 27459 | 461 | 99.61% | 3.33 | 0.1533 | 606 |
| 7X153 | 27459 | 470 | 99.63% | 3.65 | 0.0946 | 552 |
| 7X154 | 27459 | 367 | 99.65% | 2.63 | 0.2616 | 455 |
| 7X155 | 27459 | 497 | 99.64% | 3.68 | 0.1291 | 574 |
| 7X156 | 27459 | 387 | 99.62% | 2.94 | 0.1517 | 488 |
| 7X157 | 27459 | 517 | 99.66% | 3.77 | 0.1038 | 590 |
| 7X158 | 27459 | 440 | 99.67% | 3.42 | 0.1359 | 519 |
| 7X159 | 27459 | 379 | 99.70% | 2.54 | 0.3114 | 440 |
| 7X160 | 27459 | 401 | 99.57% | 2.81 | 0.201 | 529 |
| 7X161 | 27459 | 445 | 99.62% | 3.11 | 0.1919 | 550 |
| 7X162 | 27459 | 452 | 99.56% | 3.19 | 0.1654 | 559 |
| 7X163 | 27459 | 419 | 99.74% | 4.37 | 0.0261 | 475 |
| 7X164 | 27459 | 402 | 99.74% | 3.71 | 0.0688 | 452 |
| 7X165 | 27459 | 436 | 99.74% | 4.43 | 0.033 | 490 |
| 7X166 | 27459 | 364 | 99.60% | 3.22 | 0.1281 | 486 |
| 7X167 | 27459 | 458 | 99.63% | 3.56 | 0.1058 | 548 |
| 7X168 | 27459 | 475 | 99.61% | 3.43 | 0.1484 | 562 |
| 7X169 | 27459 | 297 | 99.80% | 2.71 | 0.2299 | 332 |
| 7X170 | 27459 | 382 | 99.71% | 3.58 | 0.1256 | 498 |
| 7X171 | 27459 | 346 | 99.75% | 3.33 | 0.1665 | 406 |
| 7X172 | 27459 | 346 | 99.63% | 3.53 | 0.0623 | 485 |
| 7X173 | 27459 | 411 | 99.57% | 3.67 | 0.0516 | 514 |
| 7X174 | 27459 | 463 | 99.64% | 3.98 | 0.0442 | 545 |
| 7X175 | 27459 | 435 | 99.71% | 4.06 | 0.0635 | 538 |
| 7X176 | 27459 | 430 | 99.69% | 4.41 | 0.0298 | 536 |
| 7X177 | 27459 | 437 | 99.66% | 3.94 | 0.0496 | 508 |
| 7X178 | 27459 | 274 | 99.76% | 2.99 | 0.1377 | 339 |
| 7X179 | 27459 | 250 | 99.81% | 3.07 | 0.1039 | 288 |
| 7X180 | 27459 | 281 | 99.75% | 3.35 | 0.0939 | 364 |
| 7X181 | 27459 | 411 | 99.73% | 4.33 | 0.0295 | 468 |
| 7X182 | 27459 | 395 | 99.78% | 4.34 | 0.0265 | 450 |
| 7X183 | 27459 | 368 | 99.76% | 3.95 | 0.0543 | 440 |
| 7X184 | 27459 | 389 | 99.67% | 3.82 | 0.0476 | 458 |
| 7X185 | 27459 | 486 | 99.74% | 4.6 | 0.0326 | 553 |
| 7X186 | 27459 | 484 | 99.76% | 4.59 | 0.0225 | 526 |
| 7X187 | 27459 | 405 | 99.69% | 3.66 | 0.1035 | 486 |
| 7X188 | 27459 | 404 | 99.73% | 3.82 | 0.0635 | 471 |
| 7X189 | 27459 | 394 | 99.69% | 3.4 | 0.0941 | 479 |
| 7X190 | 27459 | 313 | 99.77% | 3.43 | 0.0797 | 370 |
| 7X191 | 27459 | 415 | 99.75% | 3.78 | 0.0623 | 471 |
| 7X192 | 27459 | 406 | 99.68% | 3.63 | 0.0738 | 475 |
| 7X193 | 27459 | 408 | 99.65% | 3.86 | 0.0555 | 525 |
| 7X194 | 27459 | 356 | 99.61% | 3.14 | 0.1231 | 512 |
| 7X195 | 27459 | 373 | 99.72% | 3.86 | 0.0441 | 443 |
| 7X196 | 27459 | 305 | 99.68% | 3.1 | 0.0932 | 392 |
| 7X197 | 27459 | 290 | 99.75% | 3.16 | 0.0952 | 346 |
| 7X198 | 27459 | 354 | 99.79% | 3.2 | 0.1021 | 392 |
| 7X199 | 27459 | 334 | 99.58% | 2.35 | 0.2798 | 463 |
| 7X200 | 27459 | 366 | 99.60% | 2.49 | 0.2479 | 473 |
| 7X201 | 27459 | 487 | 99.60% | 3.75 | 0.0976 | 600 |
| 7X202 | 27459 | 249 | 99.80% | 3.19 | 0.0844 | 304 |
| 7X203 | 27459 | 283 | 99.73% | 3.19 | 0.0775 | 373 |
| 7X204 | 27459 | 227 | 99.79% | 2.58 | 0.1637 | 288 |
| 7X205 | 27459 | 344 | 99.72% | 3.22 | 0.1092 | 419 |
| 7X206 | 27459 | 292 | 99.83% | 3.83 | 0.047 | 331 |
| 7X207 | 27459 | 263 | 99.83% | 3.67 | 0.0485 | 298 |
| 7X208 | 27459 | 301 | 99.76% | 3.76 | 0.0463 | 354 |
| 7X209 | 27459 | 414 | 99.73% | 4.15 | 0.0466 | 478 |
| 7X210 | 27459 | 273 | 99.79% | 3.65 | 0.0557 | 317 |
| 7X211 | 27459 | 434 | 99.67% | 3.74 | 0.0642 | 498 |
| 7X212 | 27459 | 476 | 99.71% | 3.51 | 0.1443 | 545 |
| 7X213 | 27459 | 465 | 99.62% | 4.2 | 0.038 | 574 |
| 7X214 | 27459 | 353 | 99.72% | 3.95 | 0.0353 | 444 |
| 7X215 | 27459 | 351 | 99.74% | 3.8 | 0.0556 | 406 |
| 7X216 | 27459 | 343 | 99.69% | 3.69 | 0.0489 | 428 |
| 7X217 | 27459 | 399 | 99.68% | 3.52 | 0.0903 | 464 |
| 7X218 | 27459 | 433 | 99.71% | 3.52 | 0.1094 | 483 |
| 7X219 | 27459 | 446 | 99.69% | 4 | 0.0545 | 520 |
| 7X220 | 27459 | 298 | 99.84% | 3.71 | 0.067 | 336 |
| 7X221 | 27459 | 303 | 99.80% | 3.17 | 0.0936 | 338 |
| 7X222 | 27459 | 319 | 99.77% | 3.5 | 0.0943 | 378 |
| 7X223 | 27459 | 443 | 99.65% | 3.69 | 0.06 | 517 |
| 7X224 | 27459 | 344 | 99.63% | 3.24 | 0.0893 | 447 |
| 7X225 | 27459 | 449 | 99.43% | 3.33 | 0.0862 | 669 |
| 7X226 | 27459 | 461 | 99.62% | 3.99 | 0.042 | 550 |
| 7X227 | 27459 | 466 | 99.57% | 3.83 | 0.0519 | 583 |
| 7X228 | 27459 | 442 | 99.60% | 3.9 | 0.0473 | 542 |
| 7X229 | 27459 | 414 | 99.61% | 2.92 | 0.2108 | 532 |
| 7X230 | 27459 | 498 | 99.60% | 3.85 | 0.0764 | 609 |
| 7X231 | 27459 | 455 | 99.55% | 3.47 | 0.1049 | 584 |
| 7X232 | 27459 | 323 | 99.65% | 2.67 | 0.2179 | 401 |
| 7X233 | 27459 | 462 | 99.61% | 3.47 | 0.0913 | 569 |
| 7X234 | 27459 | 470 | 99.69% | 3.09 | 0.1805 | 540 |
| 7X235 | 27459 | 464 | 99.71% | 4.19 | 0.0392 | 521 |
| 7X236 | 27459 | 477 | 99.71% | 4.6 | 0.0225 | 552 |
| 7X237 | 27459 | 469 | 99.61% | 4.22 | 0.0299 | 565 |
| 7X238 | 27459 | 456 | 99.61% | 2.94 | 0.18 | 577 |
| 7X239 | 27459 | 206 | 99.69% | 1.91 | 0.2693 | 341 |
| 7X240 | 27459 | 325 | 99.62% | 2.42 | 0.2003 | 434 |
| 7X241 | 27459 | 262 | 99.65% | 2.31 | 0.1959 | 366 |
| 7X242 | 27459 | 400 | 99.61% | 2.7 | 0.1858 | 505 |
| 7X243 | 27459 | 399 | 99.65% | 3.09 | 0.1369 | 483 |
| 7X244 | 27459 | 315 | 99.78% | 3.96 | 0.0431 | 383 |
| 7X245 | 27459 | 315 | 99.76% | 4.03 | 0.0339 | 389 |
| 7X246 | 27459 | 391 | 99.75% | 3.9 | 0.0488 | 437 |
| 7X247 | 27459 | 411 | 99.67% | 3.77 | 0.058 | 484 |
| 7X248 | 27459 | 370 | 99.73% | 3.69 | 0.0788 | 443 |
| 7X249 | 27459 | 435 | 99.66% | 4.1 | 0.0473 | 542 |
| 7X250 | 27459 | 311 | 99.67% | 2.36 | 0.2894 | 406 |
| 7X251 | 27459 | 507 | 99.63% | 4 | 0.0545 | 586 |
| 7X252 | 27459 | 416 | 99.56% | 2.65 | 0.2509 | 564 |
| 7X253 | 27459 | 422 | 99.77% | 4.77 | 0.0151 | 500 |
| 7X254 | 27459 | 446 | 99.75% | 4.57 | 0.0246 | 494 |
| 7X255 | 27459 | 314 | 99.77% | 3.93 | 0.046 | 375 |
| 7X256 | 27459 | 337 | 99.68% | 3.53 | 0.0758 | 422 |
| 7X257 | 27459 | 350 | 99.77% | 3.8 | 0.0638 | 393 |
| 7X258 | 27459 | 287 | 99.80% | 3.81 | 0.0506 | 370 |
| 7X259 | 27459 | 305 | 99.67% | 2.1 | 0.262 | 389 |
| 7X260 | 27459 | 352 | 99.61% | 2.53 | 0.2307 | 468 |
| 7X261 | 27459 | 452 | 99.57% | 3.64 | 0.0704 | 587 |
| 7X262 | 27459 | 442 | 99.62% | 2.96 | 0.157 | 536 |
| 7X263 | 27459 | 475 | 99.62% | 3.38 | 0.1051 | 550 |
| 7X264 | 27459 | 418 | 99.58% | 2.91 | 0.1449 | 520 |
| 7X265 | 27459 | 464 | 99.60% | 3.29 | 0.1194 | 564 |
| 7X266 | 27459 | 389 | 99.62% | 2.58 | 0.2051 | 490 |
| 7X267 | 27459 | 535 | 99.63% | 4.01 | 0.0622 | 614 |
| 7X268 | 27459 | 428 | 99.68% | 2.89 | 0.1713 | 477 |
| 7X269 | 27459 | 387 | 99.68% | 3.26 | 0.1003 | 451 |
| 7X270 | 27459 | 301 | 99.69% | 2.62 | 0.1514 | 403 |
| 7X271 | 27459 | 292 | 99.71% | 3.08 | 0.1101 | 383 |
| 7X272 | 27459 | 339 | 99.68% | 3.21 | 0.0858 | 419 |
| 7X273 | 27459 | 422 | 99.58% | 3.14 | 0.1509 | 559 |
| 7X274 | 27459 | 389 | 99.62% | 2.63 | 0.168 | 472 |
| 7X275 | 27459 | 261 | 99.69% | 2.41 | 0.2109 | 369 |
| 7X276 | 27459 | 492 | 99.65% | 3.79 | 0.0778 | 585 |
| 7X277 | 27459 | 309 | 99.65% | 2.37 | 0.1969 | 415 |
| 7X278 | 27459 | 238 | 99.71% | 2.25 | 0.2247 | 379 |
| 7X279 | 27459 | 510 | 99.68% | 4.05 | 0.0704 | 574 |
| 7X280 | 27459 | 408 | 99.64% | 2.89 | 0.1548 | 487 |
| 7X281 | 27459 | 443 | 99.63% | 3.11 | 0.1441 | 560 |
| 7X282 | 27459 | 444 | 99.59% | 3.11 | 0.1384 | 551 |
| 7X283 | 27459 | 384 | 99.65% | 2.93 | 0.1457 | 468 |
| 7X284 | 27459 | 327 | 99.65% | 2.08 | 0.2713 | 410 |
| 7X285 | 27459 | 389 | 99.67% | 3.31 | 0.1073 | 452 |
| 7X286 | 27459 | 468 | 99.62% | 3.78 | 0.0634 | 561 |
| 7X287 | 27459 | 448 | 99.56% | 3.7 | 0.0854 | 620 |
| 7X288 | 27459 | 444 | 99.60% | 3.77 | 0.0758 | 564 |
| 7X289 | 27459 | 398 | 99.62% | 3.64 | 0.0758 | 501 |
| 7X290 | 27459 | 395 | 99.65% | 3.94 | 0.0496 | 484 |
| 7X291 | 27459 | 378 | 99.64% | 2.49 | 0.215 | 469 |
| 7X292 | 27459 | 385 | 99.62% | 3.03 | 0.1431 | 494 |
| 7X293 | 27459 | 382 | 99.62% | 2.59 | 0.1993 | 479 |
| 7X294 | 27459 | 449 | 99.63% | 3.95 | 0.0786 | 569 |
| 7X295 | 27459 | 468 | 99.70% | 3.73 | 0.0829 | 537 |
| 7X296 | 27459 | 506 | 99.68% | 3.8 | 0.0766 | 572 |
| 7X297 | 27459 | 282 | 99.69% | 2.33 | 0.268 | 385 |
| 7X298 | 27459 | 510 | 99.70% | 4.73 | 0.0174 | 582 |
| 7X299 | 27459 | 533 | 99.54% | 4.35 | 0.0334 | 658 |
| 7X300 | 27459 | 444 | 99.72% | 4.73 | 0.0164 | 509 |
| Total | 7068219 | 2478 |  |  |  |  |
| * A total of 300 female and 300 male mice (8 weeks old) were kept in a sterilized environment for 10 days. Mice were fed with sterilized water. At day 3 and day 10, fecal samples were collected. | | | | | | |
| In the sample ID, 0/7 represented the fecal samples taken at Day 3/Day 10, C/X indicated female/male mice and the number represented the number of of mice in the same group. | | | | | | |
