# Supplementary material for: Bacterial Atlas of Mouse Gut Microbiota
Source: Hindawi journal article supplement (doi:10.1155/2022/5968814), 2022-04-11
Supplement: f2 [file 5968814.f2.docx]

| **Table S2. The identified operational taxonomic units (OTUs) of mouse gut microbiota at each classification level.** | | | | | |
| --- | --- | --- | --- | --- | --- |
| Phylum | Class | Order | Family | Genus | Species |
| Acidobacteria | Acidimicrobiia | 1013-28-CG33 | 0319-6A21 | 0319-6A21_norank | Alistipes_uncultured bacterium |
| Actinobacteria | Acidobacteria | Acidimicrobiales | 0319-6G20 | 0319-6G20_norank | Alloprevotella_uncultured bacterium |
| Armatimonadetes | Actinobacteria | Acidobacteriales | 0319-6M6 | 0319-6M6_norank | Bacteroidales S24-7 group_uncultured bacterium |
| Bacteroidetes | Alphaproteobacteria | Aeromonadales | 1013-28-CG33_norank | 1013-28-CG33_norank | Bacteroides_uncultured bacterium |
| Chlorobi | Anaerolineae | Alphaproteobacteria_Unclassified | ABS-19 | 44524 | Lachnospiraceae NK4A136 group_uncultured bacterium |
| Chloroflexi | Armatimonadetes_uncultured | Alteromonadales | Acetobacteraceae | 12up | Lachnospiraceae_uncultured bacterium |
| Cyanobacteria | BD7-11 | Anaerolineales | Acidaminococcaceae | ABS-19_norank | Lactobacillus_uncultured bacterium |
| Deferribacteres | Bacilli | Anaeroplasmatales | Acidimicrobiaceae | Acetanaerobacterium | Ruminiclostridium 9_uncultured bacterium |
| Deinococcus-Thermus | Bacteroidia | Armatimonadetes_norank | Acidimicrobiales_uncultured | Acetatifactor | Ruminococcaceae UCG-014_uncultured bacterium |
| Firmicutes | Betaproteobacteria | B1-7BS | Acidobacteriaceae (Subgroup 1) | Acetitomaculum | Erysipelotrichaceae_uncultured bacterium |
| Fusobacteria | Blastocatellia | BD7-11_norank | Acidothermaceae | Acetobacteraceae_uncultured | Parabacteroides_Unclassified |
| GAL15 | Chlorobia | Bacillales | Aerococcaceae | Acetonema | Ruminiclostridium_uncultured bacterium |
| Gemmatimonadetes | Chloroflexia | Bacteroidales | Aeromonadaceae | Achromobacter | Ruminococcaceae_uncultured bacterium |
| Ignavibacteriae | Clostridia | Bdellovibrionales | Alcaligenaceae | Acidaminococcus | Anaerotruncus_uncultured bacterium |
| Latescibacteria | Coriobacteriia | Bifidobacteriales | Alicyclobacillaceae | Acidibacter | Bacteroides_uncultured organism |
| Lentisphaerae | Cyanobacteria | Blastocatellales | Alphaproteobacteria_Unclassified | Acidimicrobiaceae_uncultured | Lachnoclostridium_uncultured bacterium |
| Nitrospirae | Cytophagia | Burkholderiales | Anaerolineaceae | Acidimicrobiales_norank | Mollicutes RF9_uncultured bacterium |
| Peregrinibacteria | Deferribacteres | CCM11a | Anaeroplasmataceae | Acidiphilium | Roseburia_uncultured bacterium |
| Planctomycetes | Deinococci | Campylobacterales | Anaplasmataceae | Acidobacteriaceae (Subgroup 1)_uncultured | Oscillibacter_uncultured bacterium |
| Proteobacteria | Deltaproteobacteria | Caulobacterales | Archangiaceae | Acidothermus | Peptococcaceae_uncultured bacterium |
| RsaHf231 | Epsilonproteobacteria | Cellvibrionales | Armatimonadetes_norank | Acinetobacter | Enterorhabdus_uncultured bacterium |
| Saccharibacteria | Erysipelotrichia | Chlorobiales | Aurantimonadaceae | Aerococcus | Ruminiclostridium 5_uncultured bacterium |
| Spirochaetae | Fimbriimonadia | Chloroflexales | B1-7BS_norank | Aeromicrobium | [Eubacterium] xylanophilum group_uncultured bacterium |
| Synergistetes | Flavobacteriia | Chromatiales | BD7-11_norank | Aeromonas | Coprococcus 1_uncultured bacterium |
| Tenericutes | Fusobacteriia | Clostridiales | BPS-CK174 | Aerosphaera | Parabacteroides_uncultured organism |
| Thermotogae | GAL15_norank | Coriobacteriales | BSV26 | Afipia | Lachnospiraceae UCG-006_uncultured bacterium |
| Unclassified | Gammaproteobacteria | Corynebacteriales | Bacillaceae | Agromyces | Ruminococcaceae UCG-013_uncultured bacterium |
| Verrucomicrobia | Gemmatimonadetes | Cyanobacteria_Unclassified | Bacteriovoracaceae | Akkermansia | Bacteroides_Unclassified |
| WS2 | Holophagae | Cyanobacteria_norank | Bacteroidaceae | Alcaligenaceae_uncultured | Blautia_uncultured bacterium |
|  | Ignavibacteria | Cyanobacteria_uncultured | Bacteroidales S24-7 group | Alicyclobacillus | Ruminococcaceae NK4A214 group_uncultured bacterium |
|  | JG30-KF-CM66 | Cytophagales | Bacteroidales_Unclassified | Aliihoeflea | Parasutterella_uncultured bacterium |
|  | KD4-96 | D8A-2 | Beijerinckiaceae | Alistipes | Mollicutes RF9_Unclassified |
|  | Ktedonobacteria | Deferribacterales | Beutenbergiaceae | Alkaliphilus | Lachnospiraceae_Unclassified |
|  | Latescibacteria_norank | Deinococcales | Bifidobacteriaceae | Alkanindiges | Ruminococcus 1_uncultured bacterium |
|  | Lentisphaeria | Deltaproteobacteria Incertae Sedis | Blastocatellaceae (Subgroup 4) | Allobaculum | Erysipelatoclostridium_uncultured bacterium |
|  | MB-A2-108 | Desulfobacterales | Bogoriellaceae | Alloprevotella | Lachnoclostridium_Unclassified |
|  | ML635J-21 | Desulfovibrionales | Bradyrhizobiaceae | Alphaproteobacteria_Unclassified | Lactobacillus_Unclassified |
|  | Melainabacteria | Desulfurellales | Brevibacteriaceae | Alsobacter | [Eubacterium] nodatum group_uncultured bacterium |
|  | Mollicutes | Desulfuromonadales | Brucellaceae | Altererythrobacter | Lachnospiraceae UCG-001_uncultured bacterium |
|  | Negativicutes | Enterobacteriales | Burkholderiaceae | Amycolatopsis | Christensenellaceae R-7 group_uncultured bacterium |
|  | Nitriliruptoria | Entomoplasmatales | CCM11a_norank | Anaerofustis | Clostridiales vadinBB60 group_uncultured bacterium |
|  | Nitrospira | Erysipelotrichales | Carnobacteriaceae | Anaerolineaceae_uncultured | Tyzzerella_uncultured bacterium |
|  | OM190 | Fimbriimonadales | Caulobacteraceae | Anaeromyxobacter | [Eubacterium] brachy group_uncultured bacterium |
|  | Opitutae | Flavobacteriales | Cellvibrionaceae | Anaeroplasma | Ruminococcaceae UCG-005_uncultured bacterium |
|  | Peregrinibacteria_norank | Frankiales | Chitinophagaceae | Anaerosalibacter | Lachnospiraceae NK4A136 group_Unclassified |
|  | Phycisphaerae | Fusobacteriales | Christensenellaceae | Anaerospora | Marvinbryantia_uncultured bacterium |
|  | Planctomycetacia | GAL15_norank | Clostridiaceae 1 | Anaerosporobacter | Parvibacter_uncultured bacterium |
|  | Proteobacteria_Unclassified | Gaiellales | Clostridiaceae 2 | Anaerosporomusa | Alistipes_Unclassified |
|  | RsaHf231_norank | Gammaproteobacteria Incertae Sedis | Clostridiales vadinBB60 group | Anaerostipes | Butyricicoccus_uncultured bacterium |
|  | SBR2076 | Gammaproteobacteria_Unclassified | Colwelliaceae | Anaerotruncus | Ruminococcaceae UCG-009_uncultured bacterium |
|  | SJA-15 | Gastranaerophilales | Comamonadaceae | Anaerovorax | Streptococcus_uncultured bacterium |
|  | Saccharibacteria_Unknown Class | Gemmatimonadales | Conexibacteraceae | Aquamicrobium | Rikenellaceae RC9 gut group_uncultured bacterium |
|  | Solibacteres | HTA4 | Coriobacteriaceae | Arachidicoccus | Desulfovibrio_uncultured bacterium |
|  | Sphingobacteriia | Halanaerobiales | Corynebacteriaceae | Arcticibacter | Family XIII UCG-001_uncultured bacterium |
|  | Spirochaetes | Holophagales | Cryomorphaceae | Arenimonas | Coriobacteriaceae_Unclassified |
|  | Subgroup 11 | Hydrogenophilales | Cyanobacteria_Unclassified | Armatimonadetes_norank | Family XIII AD3011 group_uncultured bacterium |
|  | Subgroup 12 | Ignavibacteriales | Cyanobacteria_norank | Arthrobacter | Ruminiclostridium 6_uncultured bacterium |
|  | Subgroup 17 | JG30-KF-AS9 | Cyclobacteriaceae | Asaia | Ruminococcaceae UCG-010_uncultured bacterium |
|  | Subgroup 2 | JG30-KF-CM45 | Cytophagaceae | Asanoa | Turicibacter_uncultured bacterium |
|  | Subgroup 22 | JG30-KF-CM66_norank | D8A-2_norank | Asticcacaulis | [Eubacterium] coprostanoligenes group_uncultured bacterium |
|  | Subgroup 5 | KD4-96_norank | DA111 | Atopostipes | Lactococcus_Unclassified |
|  | Subgroup 6 | Ktedonobacterales | Deferribacteraceae | Aureimonas | Butyricimonas_Unclassified |
|  | Synergistia | Lactobacillales | Defluviitaleaceae | Azospirillum | Escherichia-Shigella_Unclassified |
|  | TK10 | Latescibacteria_norank | Demequinaceae | Azovibrio | Lachnospiraceae FCS020 group_uncultured bacterium |
|  | Thermoleophilia | MB-A2-108_norank | Dermabacteraceae | B1-7BS_norank | Candidatus Arthromitus sp. SFB-mouse-Japan |
|  | Thermomicrobia | ML635J-21_norank | Desulfobacteraceae | BD1-7 clade | Ruminococcaceae_Unclassified |
|  | Thermotogae | MSBL9 | Desulfovibrionaceae | BD7-11_norank | [Eubacterium] ventriosum group_uncultured bacterium |
|  | Unclassified | Micrococcales | Desulfurellaceae | BPS-CK174_norank | Faecalibaculum_uncultured bacterium |
|  | Verrucomicrobiae | Micromonosporales | Desulfuromonadaceae | BSV26_norank | Mollicutes RF9_uncultured rumen bacterium |
|  | WS2_norank | Mollicutes RF9 | Dietziaceae | Bacillus | Romboutsia_Unclassified |
|  |  | Mycoplasmatales | Elev-16S-1332 | Bacteroidales S24-7 group_norank | Butyricimonas_uncultured bacterium |
|  |  | Myxococcales | Enterobacteriaceae | Bacteroidales_Unclassified | Ruminococcaceae UCG-010_uncultured organism |
|  |  | NB1-j | Enterococcaceae | Bacteroides | Enterococcus_Unclassified |
|  |  | Neisseriales | Entomoplasmatales Incertae Sedis | Barnesiella | Peptococcus_uncultured bacterium |
|  |  | Nitriliruptorales | Erysipelotrichaceae | Beijerinckiaceae_uncultured | Ruminococcaceae bacterium GD6 |
|  |  | Nitrosomonadales | Erythrobacteraceae | Bergeyella | Acetatifactor_Unclassified |
|  |  | Nitrospirales | Eubacteriaceae | Bhargavaea | Lactobacillus gasseri |
|  |  | OM190_norank | FCPS473 | Bifidobacterium | Anaerovorax_uncultured bacterium |
|  |  | Obscuribacterales | FFCH13075 | Bilophila | Christensenellaceae_uncultured bacterium |
|  |  | Oceanospirillales | Family XI | Blastocatella | Candidatus Saccharimonas_uncultured bacterium |
|  |  | Oligoflexales | Family XII | Blastocatellaceae (Subgroup 4)_uncultured | Ruminococcaceae UCG-003_uncultured bacterium |
|  |  | Opitutae vadinHA64 | Family XIII | Blastococcus | Rhodospirillaceae_uncultured bacterium |
|  |  | Opitutales | Fimbriimonadaceae | Blastopirellula | Acetitomaculum_uncultured bacterium |
|  |  | Pasteurellales | Flavobacteriaceae | Blautia | Anaeroplasma_uncultured bacterium |
|  |  | PeM15 | Francisellaceae | Bosea | [Ruminococcus] torques group_uncultured bacterium |
|  |  | Peregrinibacteria_norank | Fusobacteriaceae | Brachybacterium | Erysipelotrichaceae_Unclassified |
|  |  | Petrotogales | GAL15_norank | Bradyrhizobium | Anaerostipes_Unclassified |
|  |  | Planctomycetales | Gaiellaceae | Brevibacillus | Christensenellaceae R-7 group_uncultured rumen bacterium |
|  |  | Propionibacteriales | Gaiellales_uncultured | Brevibacterium | Lachnospiraceae UCG-009_uncultured Lachnospiraceae bacterium |
|  |  | Proteobacteria_Unclassified | Gammaproteobacteria Incertae Sedis_Unknown Family | Brevundimonas | Mesorhizobium_Unclassified |
|  |  | Pseudomonadales | Gammaproteobacteria_Unclassified | Breznakia | Gastranaerophilales_uncultured bacterium |
|  |  | Pseudonocardiales | Gastranaerophilales_norank | Bryobacter | Ruminococcus 2_uncultured bacterium |
|  |  | Rhizobiales | Gemmatimonadaceae | Burkholderia-Paraburkholderia | Ruminococcaceae_uncultured organism |
|  |  | Rhodobacterales | Geobacteraceae | Butyricicoccus | Ruminococcaceae UCG-014_uncultured rumen bacterium |
|  |  | Rhodocyclales | Geodermatophilaceae | Butyricimonas | Unclassified |
|  |  | Rhodospirillales | Gracilibacteraceae | Bythopirellula | Lachnospiraceae UCG-001_Unclassified |
|  |  | Rickettsiales | Granulosicoccaceae | CCM11a_norank | Family XIII UCG-002_uncultured prokaryote |
|  |  | RsaHf231_norank | Gsoil-1167 | Camelimonas | Bifidobacterium pseudolongum subsp. pseudolongum |
|  |  | S-70 | HTA4_norank | Candidatus Actinomarina | Eisenbergiella_Unclassified |
|  |  | SAR11 clade | Hados.Sed.Eubac.3 | Candidatus Arthromitus | Tyzzerella 3_uncultured bacterium |
|  |  | SBR2076_norank | Haliangiaceae | Candidatus Bacilloplasma | Eubacterium plexicaudatum |
|  |  | SC-I-84 | Halobacteroidaceae | Candidatus Competibacter | Ruminococcaceae UCG-014_Unclassified |
|  |  | SJA-15_norank | Halomonadaceae | Candidatus Hepatoplasma | Clostridium sensu stricto 1_uncultured bacterium |
|  |  | Saccharibacteria_Unknown Order | Helicobacteraceae | Candidatus Saccharimonas | Defluviitaleaceae UCG-011_uncultured bacterium |
|  |  | Selenomonadales | Heliobacteriaceae | Candidatus Soleaferrea | Anaerotruncus_uncultured Clostridiaceae bacterium |
|  |  | Solibacterales | Holophagaceae | Candidatus Stoquefichus | Brevundimonas_Unclassified |
|  |  | Solirubrobacterales | Hydrogenophilaceae | Caproiciproducens | Gelria_uncultured bacterium |
|  |  | Sphingobacteriales | Hyphomicrobiaceae | Carboxylicivirga | Bilophila_uncultured bacterium |
|  |  | Sphingomonadales | I-10 | Catenibacterium | Staphylococcus_Unclassified |
|  |  | Spirochaetales | Iamiaceae | Caulobacter | Anaerofustis_Unclassified |
|  |  | Streptomycetales | Intrasporangiaceae | Caulobacteraceae_uncultured | Ruminiclostridium 1_uncultured bacterium |
|  |  | Subgroup 10 | JG30-KF-AS9_norank | Cellulosilyticum | Lachnospiraceae UCG-008_uncultured bacterium |
|  |  | Subgroup 11_norank | JG30-KF-CM45_norank | Cellulosimicrobium | Hydrogenoanaerobacterium_Unclassified |
|  |  | Subgroup 12_norank | JG30-KF-CM66_norank | Cellvibrio | Proteus mirabilis |
|  |  | Subgroup 17_norank | JG30a-KF-32 | Cerasibacillus | Achromobacter xylosoxidans subsp. xylosoxidans |
|  |  | Subgroup 22_norank | JTB215 | Cetobacterium | Lactobacillus reuteri SD2112 |
|  |  | Subgroup 2_norank | KCM-B-60 | Chitinophaga | Ralstonia_Unclassified |
|  |  | Subgroup 5_norank | KD3-93 | Chitinophagaceae_Unclassified | Delftia_Unclassified |
|  |  | Subgroup 6_norank | KD4-96_norank | Chitinophagaceae_uncultured | Prevotellaceae UCG-001_uncultured bacterium |
|  |  | Subgroup 7 | KF-JG30-B3 | Christensenella | Allobaculum_uncultured bacterium |
|  |  | SubsectionI | Lachnospiraceae | Christensenellaceae R-7 group | Microbacterium_Unclassified |
|  |  | SubsectionIII | Lactobacillaceae | Christensenellaceae_Unclassified | Pandoraea oxalativorans |
|  |  | Synergistales | Latescibacteria_norank | Christensenellaceae_uncultured | Syntrophococcus_uncultured bacterium |
|  |  | TK10_norank | Leptospiraceae | Chryseobacterium | Candidatus Stoquefichus_uncultured bacterium |
|  |  | TRA3-20 | Leptotrichiaceae | Citrobacter | Parabacteroides_uncultured bacterium |
|  |  | Tepidisphaerales | Leuconostocaceae | Cloacibacterium | Klebsiella_Unclassified |
|  |  | Thermoanaerobacterales | MB-A2-108_norank | Clostridiales vadinBB60 group_norank | Citrobacter_Unclassified |
|  |  | Thiotrichales | ML635J-21_norank | Clostridium sensu stricto 1 | Odoribacter_Unclassified |
|  |  | Unclassified | MNG7 | Clostridium sensu stricto 13 | Corynebacterium mastitidis |
|  |  | Verrucomicrobiales | MSB-1E8 | Clostridium sensu stricto 15 | Rikenella_uncultured bacterium |
|  |  | Vibrionales | MSBL9_norank | Clostridium sensu stricto 18 | Ruminococcaceae UCG-013_Unclassified |
|  |  | Victivallales | Marinilabiaceae | Clostridium sensu stricto 3 | Acinetobacter_uncultured bacterium |
|  |  | WS2_norank | Methylobacteriaceae | Clostridium sensu stricto 7 | Parabacteroides sp. HGS0025 |
|  |  | Xanthomonadales | Methylocystaceae | Collinsella | unidentified |
|  |  |  | Microbacteriaceae | Colwellia | Mucispirillum_uncultured bacterium |
|  |  |  | Micrococcaceae | Comamonadaceae_uncultured | Pseudomonas_Unclassified |
|  |  |  | Micrococcales Incertae Sedis | Comamonas | gut metagenome |
|  |  |  | Micromonosporaceae | Conexibacter | Christensenellaceae R-7 group_Unclassified |
|  |  |  | Mollicutes RF9_norank | Coprobacter | Acetonema_Unclassified |
|  |  |  | Moraxellaceae | Coprococcus 1 | Lachnospiraceae UCG-010_uncultured bacterium |
|  |  |  | Mycobacteriaceae | Coprococcus 2 | Corynebacterium 1_Unclassified |
|  |  |  | Mycoplasmataceae | Coprococcus 3 | Odoribacter_uncultured bacterium |
|  |  |  | NB1-j_norank | Coriobacteriaceae UCG-002 | Alphaproteobacteria_Unclassified |
|  |  |  | NS11-12 marine group | Coriobacteriaceae_uncultured | Candidatus Soleaferrea_Unclassified |
|  |  |  | NS9 marine group | Corynebacterium | Ruminiclostridium 5_Unclassified |
|  |  |  | Nakamurellaceae | Corynebacterium 1 | Olsenella_Unclassified |
|  |  |  | Neisseriaceae | Cyanobacteria_Unclassified | Helicobacter_Unclassified |
|  |  |  | Nitriliruptoraceae | Cyanobacteria_norank | Lachnospiraceae NK4B4 group_uncultured bacterium |
|  |  |  | Nitrosomonadaceae | Cytophaga | Escherichia-Shigella_uncultured bacterium |
|  |  |  | Nitrospiraceae | Cytophagaceae_uncultured | Candidatus Soleaferrea_uncultured bacterium |
|  |  |  | Nocardiaceae | D8A-2_norank | Paraprevotella_Unclassified |
|  |  |  | Nocardioidaceae | DA111_norank | Roseburia_uncultured Clostridiales bacterium |
|  |  |  | OM1 clade | DS-100 | Bosea_Unclassified |
|  |  |  | OM190_norank | Dechlorobacter | Pannonibacter phragmitetus |
|  |  |  | OPB56 | Dechloromonas | Proteobacteria_Unclassified |
|  |  |  | Obscuribacterales_norank | Defluviitaleaceae UCG-011 | Intestinibacter_Unclassified |
|  |  |  | Opitutaceae | Defluviitoga | Bacillus_Unclassified |
|  |  |  | Opitutae vadinHA64_norank | Dehalobacter | Sporobacter_uncultured bacterium |
|  |  |  | Oxalobacteraceae | Delftia | Sporosarcina_Unclassified |
|  |  |  | P. palm C-A 51 | Demequina | Sphingomonas_Unclassified |
|  |  |  | PHOS-HE36 | Dendrosporobacter | Family XIII UCG-002_uncultured bacterium |
|  |  |  | PHOS-HE51 | Denitratisoma | Rhizobium radiobacter |
|  |  |  | Paenibacillaceae | Dermabacteraceae_uncultured | Hydrogenispora_Unclassified |
|  |  |  | Pasteurellaceae | Desemzia | Lysinibacillus_Unclassified |
|  |  |  | PeM15_norank | Desulfobotulus | Streptococcus_Unclassified |
|  |  |  | Peptococcaceae | Desulfosporosinus | Stenotrophomonas_uncultured bacterium |
|  |  |  | Peptostreptococcaceae | Desulfotomaculum | Acetatifactor_uncultured bacterium |
|  |  |  | Peregrinibacteria_norank | Desulfovibrio | Solibacillus_uncultured bacterium |
|  |  |  | Petrotogaceae | Desulfovibrionaceae_uncultured | [Acetivibrio] ethanolgignens group_Unclassified |
|  |  |  | Phyllobacteriaceae | Desulfuromonas | Clostridiales vadinBB60 group_Unclassified |
|  |  |  | Planctomycetaceae | Devosia | Prevotellaceae NK3B31 group_uncultured bacterium |
|  |  |  | Planococcaceae | Dialister | Serratia_Unclassified |
|  |  |  | Polyangiaceae | Dietzia | Lysinibacillus sphaericus |
|  |  |  | Porphyromonadaceae | Dinghuibacter | Sporomusa sphaeroides |
|  |  |  | Prevotellaceae | Donghicola | Parasutterella_Unclassified |
|  |  |  | Prolixibacteraceae | Dongia | Paenibacillus_Unclassified |
|  |  |  | Promicromonosporaceae | Dyadobacter | Lachnospiraceae_uncultured organism |
|  |  |  | Propionibacteriaceae | Dysgonomonas | Lactobacillus_uncultured Lactobacillus sp. |
|  |  |  | Proteobacteria_Unclassified | Eggerthella | Methylobacterium_Unclassified |
|  |  |  | Pseudoalteromonadaceae | Eisenbergiella | Acinetobacter_Unclassified |
|  |  |  | Pseudomonadaceae | Elev-16S-1332_norank | Leifsonia_Unclassified |
|  |  |  | Pseudonocardiaceae | Empedobacter | Ruminococcaceae_uncultured rumen bacterium |
|  |  |  | Psychromonadaceae | Enhydrobacter | Helicobacter sp. MIT 01-6451 |
|  |  |  | Rhizobiaceae | Ensifer | Lachnospiraceae bacterium 3-1 |
|  |  |  | Rhizobiales Incertae Sedis | Enteractinococcus | Glutamicibacter_Unclassified |
|  |  |  | Rhodobacteraceae | Enterobacteriaceae_Unclassified | Parabacteroides goldsteinii |
|  |  |  | Rhodobiaceae | Enterococcus | Cyanobacteria_uncultured bacterium |
|  |  |  | Rhodocyclaceae | Enterorhabdus | Hydrogenispora_uncultured bacterium |
|  |  |  | Rhodospirillaceae | Erysipelatoclostridium | Aerococcus_Unclassified |
|  |  |  | Rhodospirillales Incertae Sedis | Erysipelotrichaceae UCG-003 | Enhydrobacter_Unclassified |
|  |  |  | Rikenellaceae | Erysipelotrichaceae_Unclassified | [Ruminococcus] torques group_uncultured organism |
|  |  |  | Roseiflexaceae | Erysipelotrichaceae_uncultured | Alistipes indistinctus YIT 12060 |
|  |  |  | Rs-E47 termite group | Erythrobacter | Chryseobacterium_Unclassified |
|  |  |  | RsaHf231_norank | Escherichia-Shigella | Flavonifractor_Unclassified |
|  |  |  | Ruminococcaceae | Exiguobacterium | Gastranaerophilales_Unclassified |
|  |  |  | S-70_norank | FCPS473_norank | Massilia_uncultured bacterium |
|  |  |  | SBR2076_norank | FFCH13075_norank | Enterobacter ludwigii |
|  |  |  | SC-I-84_norank | Facklamia | Jeotgalicoccus halotolerans |
|  |  |  | SJA-15_norank | Faecalibacterium | Microbacterium_uncultured bacterium |
|  |  |  | Saccharibacteria_Unknown Family | Faecalibaculum | Ochrobactrum_Unclassified |
|  |  |  | Sandaracinaceae | Family XIII AD3011 group | Cellulosimicrobium_Unclassified |
|  |  |  | Saprospiraceae | Family XIII UCG-001 | Christensenellaceae_Unclassified |
|  |  |  | Selenomonadales_uncultured | Family XIII UCG-002 | Coriobacteriaceae_uncultured bacterium |
|  |  |  | Sh765B-TzT-35 | Family XIII_uncultured | Family XIII_uncultured bacterium |
|  |  |  | Shewanellaceae | Family XI_uncultured | Streptomyces_Unclassified |
|  |  |  | Solibacteraceae (Subgroup 3) | Ferruginibacter | Christensenella minuta |
|  |  |  | Solirubrobacteraceae | Fimbriimonadaceae_norank | Pantoea cypripedii |
|  |  |  | Sphingobacteriaceae | Flavobacteriaceae_uncultured | Saccharopolyspora_Unclassified |
|  |  |  | Sphingobacteriales_uncultured | Flavobacterium | Subgroup 6_uncultured bacterium |
|  |  |  | Sphingomonadaceae | Flavonifractor | 0319-6A21_uncultured bacterium |
|  |  |  | Spirochaetaceae | Fluviicola | Mobilitalea_uncultured bacterium |
|  |  |  | Spongiibacteraceae | Formosa | Paenibacillus_uncultured bacterium |
|  |  |  | Sporichthyaceae | Francisella | Azospirillum lipoferum |
|  |  |  | Sporolactobacillaceae | Fusibacter | Corynebacterium urealyticum DSM 7109 |
|  |  |  | Staphylococcaceae | Fusobacterium | D8A-2_uncultured bacterium |
|  |  |  | Streptococcaceae | GAL15_norank | Erysipelotrichaceae UCG-003_uncultured bacterium |
|  |  |  | Streptomycetaceae | Gaiella | Prevotella 9_uncultured bacterium |
|  |  |  | Subgroup 11_norank | Gaiellales_norank | Faecalibacterium_uncultured bacterium |
|  |  |  | Subgroup 12_norank | Gallicola | Thermoanaerobacteraceae_uncultured bacterium |
|  |  |  | Subgroup 17_norank | Gammaproteobacteria Incertae Sedis_uncultured | Lachnoclostridium 12_Unclassified |
|  |  |  | Subgroup 22_norank | Gammaproteobacteria_Unclassified | Akkermansia_uncultured bacterium |
|  |  |  | Subgroup 2_norank | Gastranaerophilales_norank | Aquamicrobium_Unclassified |
|  |  |  | Subgroup 5_norank | Gelria | Asanoa_uncultured bacterium |
|  |  |  | Subgroup 6_norank | Gemmata | Coprococcus 2_Unclassified |
|  |  |  | Subgroup 7_norank | Gemmatimonadaceae_uncultured | Donghicola_Unclassified |
|  |  |  | SubsectionIII_FamilyI | Gemmatimonas | Rhodospirillaceae_Unclassified |
|  |  |  | SubsectionI_FamilyI | Geobacillus | Clostridium sensu stricto 1_Unclassified |
|  |  |  | Succinivibrionaceae | Geobacter | Desulfovibrio_Unclassified |
|  |  |  | Surface 1 | Georgenia | Rhizobium_Unclassified |
|  |  |  | Sva0996 marine group | Geothrix | Rhodococcus ruber |
|  |  |  | Synergistaceae | Gilvibacter | Anaerospora_uncultured bacterium |
|  |  |  | Syntrophomonadaceae | Glutamicibacter | Pseudobacteroides_uncultured bacterium |
|  |  |  | Syntrophorhabdaceae | Gordonia | Weissella confusa |
|  |  |  | TK10_norank | Gordonibacter | [Pasteurella] pneumotropica |
|  |  |  | TK85 | Gracilibacteraceae_uncultured | Brachybacterium paraconglomeratum |
|  |  |  | TRA3-20_norank | Gramella | Asaia_uncultured bacterium |
|  |  |  | Tepidisphaeraceae | Granulicella | Comamonas_uncultured bacterium |
|  |  |  | Thermoactinomycetaceae | Granulosicoccus | Hydrogenophaga_uncultured bacterium |
|  |  |  | Thermoanaerobacteraceae | Gsoil-1167_norank | Leptospira broomii |
|  |  |  | Thermosporotrichaceae | H16 | Lysobacter_uncultured bacterium |
|  |  |  | Trueperaceae | HTA4_norank | Paracoccus_Unclassified |
|  |  |  | Unclassified | Hados.Sed.Eubac.3_norank | Pelosinus_uncultured bacterium |
|  |  |  | Veillonellaceae | Haliangium | Subgroup 6_Unclassified |
|  |  |  | Verrucomicrobiaceae | Halobacillus | Vibrio_Unclassified |
|  |  |  | Vibrionaceae | Halobacteroidaceae_uncultured | Brevibacterium_Unclassified |
|  |  |  | Victivallaceae | Halomonas | Comamonadaceae_uncultured bacterium |
|  |  |  | WS2_norank | Hathewaya | Desemzia_uncultured bacterium |
|  |  |  | Xanthobacteraceae | Helicobacter | Leucobacter_Unclassified |
|  |  |  | Xanthomonadaceae | Herbiconiux | Mobilitalea_Unclassified |
|  |  |  | Xanthomonadales Incertae Sedis | Holdemanella | Paenalcaligenes_Unclassified |
|  |  |  | Xanthomonadales_uncultured | Holdemania | Agrobacterium sp. H13-3 |
|  |  |  | env.OPS 17 | Holophagaceae_uncultured | Anaerolineaceae_uncultured bacterium |
|  |  |  |  | Hydrogenispora | Anaerosporomusa_uncultured bacterium |
|  |  |  |  | Hydrogenoanaerobacterium | Candidatus Bacilloplasma_uncultured bacterium |
|  |  |  |  | Hydrogenophaga | Eggerthella lenta DSM 2243 |
|  |  |  |  | Hymenobacter | KD4-96_uncultured bacterium |
|  |  |  |  | Hyphomicrobiaceae_Unclassified | Nitrosomonadaceae_uncultured bacterium |
|  |  |  |  | Hyphomicrobium | Pseudomonas aeruginosa |
|  |  |  |  | I-10_norank | Syntrophomonas_uncultured bacterium |
|  |  |  |  | Iamia | Collinsella_uncultured bacterium |
|  |  |  |  | Intestinibacter | Facklamia_Unclassified |
|  |  |  |  | JG30-KF-AS9_norank | Herbiconiux_Unclassified |
|  |  |  |  | JG30-KF-CM45_norank | Leuconostoc lactis |
|  |  |  |  | JG30-KF-CM66_norank | Muricoccus_Unclassified |
|  |  |  |  | JG30a-KF-32_norank | Peptococcaceae_Unclassified |
|  |  |  |  | JTB215_norank | Ruminococcus 1_uncultured rumen bacterium |
|  |  |  |  | Janibacter | Trichococcus_uncultured bacterium |
|  |  |  |  | Jeotgalicoccus | Veillonellaceae_uncultured bacterium |
|  |  |  |  | KCM-B-60_norank | Escherichia-Shigella_uncultured organism |
|  |  |  |  | KD3-93_norank | Gordonibacter pamelaeae |
|  |  |  |  | KD4-96_norank | Jeotgalicoccus_Unclassified |
|  |  |  |  | KF-JG30-B3_norank | Lactobacillus kalixensis |
|  |  |  |  | Ketogulonicigenium | Nocardioides_uncultured bacterium |
|  |  |  |  | Klebsiella | Pseudochrobactrum saccharolyticum |
|  |  |  |  | Komagataeibacter | Psychrobacter_uncultured bacterium |
|  |  |  |  | Kroppenstedtia | Xanthomonadales Incertae Sedis_uncultured bacterium |
|  |  |  |  | Lachnoclostridium | [Eubacterium] brachy group_uncultured Eubacteriaceae bacterium |
|  |  |  |  | Lachnoclostridium 12 | [Eubacterium] fissicatena group_Unclassified |
|  |  |  |  | Lachnoclostridium 5 | Bradyrhizobium_uncultured Bradyrhizobium sp. |
|  |  |  |  | Lachnospira | Devosia_Unclassified |
|  |  |  |  | Lachnospiraceae FCS020 group | Faecalibaculum rodentium |
|  |  |  |  | Lachnospiraceae ND3007 group | Leuconostoc_uncultured bacterium |
|  |  |  |  | Lachnospiraceae NK4A136 group | Peptostreptococcaceae_Unclassified |
|  |  |  |  | Lachnospiraceae NK4B4 group | Rhizobacter_uncultured bacterium |
|  |  |  |  | Lachnospiraceae UCG-001 | Sphingobium_Unclassified |
|  |  |  |  | Lachnospiraceae UCG-006 | Sporosarcina_uncultured bacterium |
|  |  |  |  | Lachnospiraceae UCG-008 | Subdoligranulum_uncultured bacterium |
|  |  |  |  | Lachnospiraceae UCG-009 | Subgroup 6_uncultured Acidobacteria bacterium |
|  |  |  |  | Lachnospiraceae UCG-010 | Thiobacillus_uncultured bacterium |
|  |  |  |  | Lachnospiraceae XPB1014 group | Arthrobacter_uncultured bacterium |
|  |  |  |  | Lachnospiraceae_Unclassified | Bacteroides intestinalis DSM 17393 |
|  |  |  |  | Lachnospiraceae_uncultured | Coriobacteriaceae UCG-002_uncultured bacterium |
|  |  |  |  | Lactobacillus | Dietzia_Unclassified |
|  |  |  |  | Lactococcus | Exiguobacterium indicum |
|  |  |  |  | Larkinella | Flavobacterium_Unclassified |
|  |  |  |  | Latescibacteria_norank | Gemmatimonadaceae_uncultured bacterium |
|  |  |  |  | Leifsonia | Marvinbryantia_uncultured rumen bacterium |
|  |  |  |  | Leptolinea | Novosphingobium_uncultured bacterium |
|  |  |  |  | Leptospira | Senegalimassilia_Unclassified |
|  |  |  |  | Leptotrichia | Subgroup 17_uncultured Acidobacteria bacterium |
|  |  |  |  | Leptotrichiaceae_uncultured | Aeromonas_Unclassified |
|  |  |  |  | Leucobacter | Caulobacter_Unclassified |
|  |  |  |  | Leuconostoc | Gaiellales_Unclassified |
|  |  |  |  | Longilinea | Hydrogenispora_uncultured Firmicutes bacterium |
|  |  |  |  | Longispora | Lactobacillus sanfranciscensis TMW 1.1304 |
|  |  |  |  | Luteimonas | Micromonospora_Unclassified |
|  |  |  |  | Lysinibacillus | Nitrospira_uncultured bacterium |
|  |  |  |  | Lysinimonas | Nocardioides_Unclassified |
|  |  |  |  | Lysobacter | Paraburkholderia graminis |
|  |  |  |  | MB-A2-108_norank | Planctomycetaceae_uncultured bacterium |
|  |  |  |  | ML635J-21_norank | Sphingobacterium_uncultured bacterium |
|  |  |  |  | MNG7_norank | Arthrobacter_Unclassified |
|  |  |  |  | MSB-1E8_norank | Blastocatellaceae (Subgroup 4)_uncultured bacterium |
|  |  |  |  | MSBL9_norank | Brevibacterium_uncultured bacterium |
|  |  |  |  | Macellibacteroides | Cetobacterium somerae |
|  |  |  |  | Marinicella | Dehalobacter_Unclassified |
|  |  |  |  | Mariniradius | H16_uncultured bacterium |
|  |  |  |  | Marvinbryantia | Lysobacter_uncultured proteobacterium |
|  |  |  |  | Massilia | Propionispora_Unclassified |
|  |  |  |  | Megamonas | Pseudonocardia_Unclassified |
|  |  |  |  | Megasphaera | RB41_uncultured Acidobacteria bacterium |
|  |  |  |  | Merismopedia | Subgroup 7_uncultured bacterium |
|  |  |  |  | Mesoflavibacter | Terrisporobacter_uncultured bacterium |
|  |  |  |  | Mesorhizobium | Xanthomonadales_uncultured bacterium |
|  |  |  |  | Methylobacterium | Aerosphaera_uncultured bacterium |
|  |  |  |  | Methylocystis | Bacillus galactosidilyticus |
|  |  |  |  | Microbacteriaceae_Unclassified | Bacillus_uncultured bacterium |
|  |  |  |  | Microbacterium | Barnesiella viscericola DSM 18177 |
|  |  |  |  | Micrococcus | Dechloromonas_Unclassified |
|  |  |  |  | Microlunatus | Defluviitaleaceae UCG-011_uncultured organism |
|  |  |  |  | Micromonospora | Halomonas_Unclassified |
|  |  |  |  | Micromonosporaceae_Unclassified | Lysinimonas_uncultured bacterium |
|  |  |  |  | Microvirga | Photobacterium damselae subsp. damselae |
|  |  |  |  | Mizugakiibacter | Pseudoalteromonas_Unclassified |
|  |  |  |  | Mobilitalea | Roseomonas ludipueritiae |
|  |  |  |  | Modestobacter | Ruminococcaceae UCG-001_uncultured rumen bacterium |
|  |  |  |  | Moheibacter | Synechococcus_uncultured bacterium |
|  |  |  |  | Mollicutes RF9_norank | 12up_Unclassified |
|  |  |  |  | Mucinivorans | Arenimonas_uncultured bacterium |
|  |  |  |  | Mucispirillum | Atopostipes_Unclassified |
|  |  |  |  | Muricoccus | BD7-11_uncultured bacterium |
|  |  |  |  | Mycobacterium | Bacillus gibsonii |
|  |  |  |  | Mycoplasma | Brevibacillus panacihumi W25 |
|  |  |  |  | Mycoplasmataceae_uncultured | Dehalobacter_uncultured Dehalobacter sp. |
|  |  |  |  | Myroides | Flavobacterium_uncultured bacterium |
|  |  |  |  | NB1-j_norank | Geobacillus sp. WCH70 |
|  |  |  |  | NS11-12 marine group_norank | Hados.Sed.Eubac.3_Unclassified |
|  |  |  |  | NS2b marine group | JG30-KF-CM45_uncultured bacterium |
|  |  |  |  | NS3a marine group | Latescibacteria_uncultured Latescibacteria bacterium |
|  |  |  |  | NS9 marine group_norank | Megamonas_uncultured bacterium |
|  |  |  |  | Nakamurella | Micrococcus luteus |
|  |  |  |  | Naumannella | Neisseria_uncultured bacterium |
|  |  |  |  | Neisseria | Nitrosomonadaceae_uncultured soil bacterium |
|  |  |  |  | Neisseriaceae_uncultured | Paenarthrobacter_Unclassified |
|  |  |  |  | Nitriliruptoraceae_Unclassified | Paenibacillus_uncultured Paenibacillus sp. |
|  |  |  |  | Nitrosomonadaceae_uncultured | Papillibacter_uncultured bacterium |
|  |  |  |  | Nitrosomonas | Planctomyces_uncultured bacterium |
|  |  |  |  | Nitrospira | Promicromonospora_Unclassified |
|  |  |  |  | Nitrospiraceae_uncultured | Rhodobiaceae_uncultured bacterium |
|  |  |  |  | Nocardia | Ruminiclostridium 1_Unclassified |
|  |  |  |  | Nocardioides | Ruminococcaceae UCG-002_uncultured bacterium |
|  |  |  |  | Nordella | Selenomonadales_uncultured bacterium |
|  |  |  |  | Novosphingobium | Sellimonas_Unclassified |
|  |  |  |  | Nubsella | Sphingobacterium_Unclassified |
|  |  |  |  | OM190_norank | Sporomusa termitida |
|  |  |  |  | OPB56_norank | Subgroup 2_uncultured bacterium |
|  |  |  |  | Obscuribacterales_norank | Subgroup 6_uncultured Acidobacteriales bacterium |
|  |  |  |  | Oceanisphaera | Syntrophaceticus_uncultured bacterium |
|  |  |  |  | Oceanobacterium | Thalassobius_uncultured alpha proteobacterium |
|  |  |  |  | Ochrobactrum | Variibacter_Unclassified |
|  |  |  |  | Odoribacter | Acidimicrobiaceae_Unclassified |
|  |  |  |  | Oligella | Agromyces_Unclassified |
|  |  |  |  | Olsenella | Alkanindiges_uncultured bacterium |
|  |  |  |  | Opitutae vadinHA64_norank | Allobaculum_Unclassified |
|  |  |  |  | Opitutus | Anaerosporobacter_Unclassified |
|  |  |  |  | Oscillibacter | Chitinophagaceae_uncultured bacterium |
|  |  |  |  | P. palm C-A 51_norank | Clostridium sensu stricto 7_uncultured Clostridium sp. |
|  |  |  |  | PHOS-HE36_norank | Clostridium thermopalmarium |
|  |  |  |  | PHOS-HE51_norank | Cyanobacteria_Unclassified |
|  |  |  |  | Paenalcaligenes | Cytophagaceae_uncultured bacterium |
|  |  |  |  | Paenarthrobacter | Dendrosporobacter quercicolus |
|  |  |  |  | Paenibacillus | Devosia_uncultured bacterium |
|  |  |  |  | Paeniclostridium | Erythrobacter_Unclassified |
|  |  |  |  | Paludibaculum | Ferruginibacter_uncultured bacterium |
|  |  |  |  | Pandoraea | Gaiellales_uncultured bacterium |
|  |  |  |  | Pannonibacter | Lactobacillus lindneri |
|  |  |  |  | Pantoea | Mesoflavibacter_Unclassified |
|  |  |  |  | Papillibacter | Mizugakiibacter_uncultured Xanthomonadaceae bacterium |
|  |  |  |  | Parabacteroides | Mycobacterium_uncultured bacterium |
|  |  |  |  | Paracoccus | Mycoplasma_uncultured bacterium |
|  |  |  |  | Paraprevotella | Nitrosomonadaceae_Unclassified |
|  |  |  |  | Parasphingopyxis | Nocardioides pyridinolyticus JCM 10369 |
|  |  |  |  | Parasutterella | Oceanobacterium_uncultured bacterium |
|  |  |  |  | Parvibacter | Paeniclostridium_Unclassified |
|  |  |  |  | Pasteurella | PeM15_uncultured bacterium |
|  |  |  |  | PeM15_norank | Pedobacter_uncultured bacterium |
|  |  |  |  | Pediococcus | Peptostreptococcus_uncultured bacterium |
|  |  |  |  | Pedobacter | Pirellula_uncultured bacterium |
|  |  |  |  | Pedomicrobium | Propionibacterium_uncultured bacterium |
|  |  |  |  | Pelagibacterium | Rhodobacter_uncultured bacterium |
|  |  |  |  | Pelosinus | Roseiflexus_uncultured bacterium |
|  |  |  |  | Pelospora | SC-I-84_uncultured bacterium |
|  |  |  |  | Pelotomaculum | Sporotomaculum_uncultured bacterium |
|  |  |  |  | Peptoclostridium | Subgroup 22_uncultured bacterium |
|  |  |  |  | Peptococcaceae_Unclassified | Tepidimicrobium_Unclassified |
|  |  |  |  | Peptococcaceae_uncultured | Xanthobacteraceae_uncultured bacterium |
|  |  |  |  | Peptococcus | Acidibacter_uncultured bacterium |
|  |  |  |  | Peptostreptococcaceae_Unclassified | Acidimicrobiales_uncultured bacterium |
|  |  |  |  | Peptostreptococcus | Aeromicrobium_uncultured bacterium |
|  |  |  |  | Peredibacter | Altererythrobacter_uncultured bacterium |
|  |  |  |  | Peregrinibacteria_norank | Atopostipes_uncultured Carnobacteriaceae bacterium |
|  |  |  |  | Petrimonas | BD1-7 clade_Unclassified |
|  |  |  |  | Phascolarctobacterium | Beijerinckiaceae_uncultured bacterium |
|  |  |  |  | Phenylobacterium | Carboxylicivirga_uncultured bacterium |
|  |  |  |  | Photobacterium | Chitinophaga_uncultured bacterium |
|  |  |  |  | Pigmentiphaga | Clostridium sensu stricto 13_uncultured bacterium |
|  |  |  |  | Pirellula | Coprococcus 3_uncultured bacterium |
|  |  |  |  | Planctomyces | Demequina_uncultured bacterium |
|  |  |  |  | Planctomycetaceae_uncultured | Denitratisoma_Unclassified |
|  |  |  |  | Planktothrix | Dysgonomonas_Unclassified |
|  |  |  |  | Pleomorphomonas | Enteractinococcus_Unclassified |
|  |  |  |  | Polaribacter 2 | Fusobacterium_Unclassified |
|  |  |  |  | Polaromonas | Gaiella_uncultured bacterium |
|  |  |  |  | Prevotella 1 | Gemmata_uncultured bacterium |
|  |  |  |  | Prevotella 7 | Gramella_Unclassified |
|  |  |  |  | Prevotella 9 | KF-JG30-B3_uncultured bacterium |
|  |  |  |  | Prevotellaceae Ga6A1 group | Lachnospiraceae XPB1014 group_uncultured bacterium |
|  |  |  |  | Prevotellaceae NK3B31 group | Merismopedia_Unclassified |
|  |  |  |  | Prevotellaceae UCG-001 | Microbacteriaceae_Unclassified |
|  |  |  |  | Prevotellaceae UCG-004 | Microvirga_uncultured bacterium |
|  |  |  |  | Prevotellaceae_uncultured | OM190_uncultured bacterium |
|  |  |  |  | Prolixibacter | Oligella ureolytica |
|  |  |  |  | Promicromonospora | Pelospora_Unclassified |
|  |  |  |  | Propionibacterium | Photobacterium_uncultured bacterium |
|  |  |  |  | Propionicicella | Psychrobacter_Unclassified |
|  |  |  |  | Propionigenium | Rhodospirillaceae_uncultured Rhodospirillaceae bacterium |
|  |  |  |  | Propionispora | Roseomonas_Unclassified |
|  |  |  |  | Proteiniclasticum | Solirubrobacter_uncultured bacterium |
|  |  |  |  | Proteobacteria_Unclassified | Subgroup 5_uncultured Acidobacteria bacterium |
|  |  |  |  | Proteocatella | Tenacibaculum litoreum |
|  |  |  |  | Proteus | Tepidisphaeraceae_uncultured bacterium |
|  |  |  |  | Providencia | Thermomonas_Unclassified |
|  |  |  |  | Pseudoalteromonas | Veillonella_Unclassified |
|  |  |  |  | Pseudobacteroides | Zymobacter palmae |
|  |  |  |  | Pseudochrobactrum | [Ruminococcus] gauvreauii group_uncultured bacterium |
|  |  |  |  | Pseudomonas | Acidobacteriaceae (Subgroup 1)_uncultured bacterium |
|  |  |  |  | Pseudonocardia | Aliihoeflea_Unclassified |
|  |  |  |  | Pseudoxanthomonas | Alkaliphilus_uncultured bacterium |
|  |  |  |  | Psychrobacter | Anaerosalibacter_Unclassified |
|  |  |  |  | Psychrobium | Bacteroides caecigallinarum |
|  |  |  |  | Psychroflexus | Breznakia_Unclassified |
|  |  |  |  | Psychromonas | Candidatus Hepatoplasma_Unclassified |
|  |  |  |  | Pusillimonas | Clostridium sporogenes |
|  |  |  |  | Pyramidobacter | DS-100_uncultured bacterium |
|  |  |  |  | RB41 | Georgenia_uncultured bacterium |
|  |  |  |  | Ralstonia | Hathewaya_Unclassified |
|  |  |  |  | Reyranella | Holdemania_Unclassified |
|  |  |  |  | Rhizobacter | JG30-KF-AS9_uncultured bacterium |
|  |  |  |  | Rhizobium | JG30a-KF-32_uncultured bacterium |
|  |  |  |  | Rhizomicrobium | Lactobacillus_uncultured Bacilli bacterium |
|  |  |  |  | Rhodanobacter | Latescibacteria_uncultured bacterium |
|  |  |  |  | Rhodobacter | Leptotrichiaceae_uncultured bacterium |
|  |  |  |  | Rhodobacteraceae_uncultured | Leuconostoc_Unclassified |
|  |  |  |  | Rhodobiaceae_uncultured | Luteimonas_uncultured bacterium |
|  |  |  |  | Rhodobium | MNG7_uncultured bacterium |
|  |  |  |  | Rhodococcus | Mariniradius saccharolyticus AK6 |
|  |  |  |  | Rhodospirillaceae_uncultured | Microlunatus_Unclassified |
|  |  |  |  | Rikenella | Microvirga_Unclassified |
|  |  |  |  | Rikenellaceae RC9 gut group | Moheibacter_uncultured Bacteroidetes bacterium |
|  |  |  |  | Romboutsia | Mucinivorans hirudinis |
|  |  |  |  | Roseburia | NS2b marine group_Unclassified |
|  |  |  |  | Roseiflexus | Nocardia carnea |
|  |  |  |  | Roseococcus | Oceanisphaera_Unclassified |
|  |  |  |  | Roseomonas | Opitutus_Unclassified |
|  |  |  |  | Rs-D38 termite group | PHOS-HE51_uncultured bacterium |
|  |  |  |  | Rs-E47 termite group_norank | Papillibacter_Unclassified |
|  |  |  |  | RsaHf231_norank | Pelagibacterium_uncultured bacterium |
|  |  |  |  | Rubellimicrobium | Pelotomaculum_uncultured Pelotomaculum sp. |
|  |  |  |  | Rubritepida | Peptoclostridium_uncultured bacterium |
|  |  |  |  | Ruminiclostridium | Phascolarctobacterium_Unclassified |
|  |  |  |  | Ruminiclostridium 1 | Phenylobacterium_uncultured bacterium |
|  |  |  |  | Ruminiclostridium 5 | Pigmentiphaga sp. Zn-d-2 |
|  |  |  |  | Ruminiclostridium 6 | Polaribacter 2_Unclassified |
|  |  |  |  | Ruminiclostridium 9 | Prevotella 1_uncultured bacterium |
|  |  |  |  | Ruminococcaceae NK4A214 group | Providencia_Unclassified |
|  |  |  |  | Ruminococcaceae UCG-001 | Reyranella_uncultured Rhizobiales bacterium |
|  |  |  |  | Ruminococcaceae UCG-002 | Roseburia_uncultured organism |
|  |  |  |  | Ruminococcaceae UCG-003 | Ruminococcaceae UCG-013_uncultured Clostridiaceae bacterium |
|  |  |  |  | Ruminococcaceae UCG-005 | Subgroup 11_uncultured Acidobacteria bacterium |
|  |  |  |  | Ruminococcaceae UCG-009 | Variibacter_uncultured bacterium |
|  |  |  |  | Ruminococcaceae UCG-010 | Winogradskyella_Unclassified |
|  |  |  |  | Ruminococcaceae UCG-011 | Wolbachia_Unclassified |
|  |  |  |  | Ruminococcaceae UCG-013 | Xanthomonadales_uncultured gamma proteobacterium |
|  |  |  |  | Ruminococcaceae UCG-014 | [Clostridium] innocuum group_Unclassified |
|  |  |  |  | Ruminococcaceae_Unclassified | [Eubacterium] hallii group_uncultured bacterium |
|  |  |  |  | Ruminococcaceae_uncultured | 1013-28-CG33_uncultured bacterium |
|  |  |  |  | Ruminococcus 1 | ABS-19_uncultured bacterium |
|  |  |  |  | Ruminococcus 2 | Acetanaerobacterium_Unclassified |
|  |  |  |  | S-70_norank | Acidothermus_uncultured bacterium |
|  |  |  |  | SBR2076_norank | Alcaligenaceae_uncultured bacterium |
|  |  |  |  | SC-I-84_norank | Anaeromyxobacter_uncultured bacterium |
|  |  |  |  | SJA-15_norank | Bacteroides finegoldii CL09T03C10 |
|  |  |  |  | Saccharibacillus | Bergeyella_uncultured bacterium |
|  |  |  |  | Saccharicrinis | Bryobacter_uncultured bacterium |
|  |  |  |  | Saccharomonospora | Candidatus Actinomarina_uncultured bacterium |
|  |  |  |  | Saccharopolyspora | Candidatus Arthromitus sp. SFB-mouse-NL |
|  |  |  |  | Salana | Candidatus Soleaferrea_uncultured Clostridiales bacterium |
|  |  |  |  | Salinarimonas | Caproiciproducens_Unclassified |
|  |  |  |  | Sandaracinaceae_uncultured | Caulobacteraceae_uncultured bacterium |
|  |  |  |  | Saprospiraceae_uncultured | Chitinophagaceae_Unclassified |
|  |  |  |  | Sedimentibacter | Cloacibacterium_Unclassified |
|  |  |  |  | Selenomonadales_norank | Clostridium sensu stricto 15_Unclassified |
|  |  |  |  | Sellimonas | Colwellia_uncultured bacterium |
|  |  |  |  | Senegalimassilia | Dechlorobacter_uncultured bacterium |
|  |  |  |  | Serratia | Dechloromonas_uncultured bacterium |
|  |  |  |  | Sh765B-TzT-35_norank | Desulfotomaculum ruminis DSM 2154 |
|  |  |  |  | Shewanella | Desulfovibrionaceae_uncultured bacterium |
|  |  |  |  | Shimia | Dysgonomonas_uncultured bacterium |
|  |  |  |  | Shimwellia | FFCH13075_uncultured bacterium |
|  |  |  |  | Singulisphaera | Fusibacter_Unclassified |
|  |  |  |  | Sinomonas | Gammaproteobacteria Incertae Sedis_Unclassified |
|  |  |  |  | Siphonobacter | Gemmatimonadaceae_uncultured soil bacterium |
|  |  |  |  | Skermanella | Halobacillus_Unclassified |
|  |  |  |  | Solibacillus | Halobacteroidaceae_Unclassified |
|  |  |  |  | Solirubrobacter | Hydrogenoanaerobacterium_uncultured bacterium |
|  |  |  |  | Solitalea | Hyphomicrobium_uncultured bacterium |
|  |  |  |  | Sorangium | JG30-KF-CM45_uncultured Chloroflexi bacterium |
|  |  |  |  | Sphingobacteriales_norank | Janibacter cremeus |
|  |  |  |  | Sphingobacterium | Lachnoclostridium 5_Unclassified |
|  |  |  |  | Sphingobium | Lachnospira_uncultured bacterium |
|  |  |  |  | Sphingomonas | Lactobacillus paralimentarius |
|  |  |  |  | Sphingorhabdus | Lactobacillus rossiae DSM 15814 |
|  |  |  |  | Spirochaeta 2 | Longilinea_uncultured bacterium |
|  |  |  |  | Spirosoma | MNG7_Unclassified |
|  |  |  |  | Spongiimonas | Megasphaera_uncultured bacterium |
|  |  |  |  | Sporobacter | Myroides odoratus |
|  |  |  |  | Sporolactobacillaceae_uncultured | Neisseriaceae_uncultured bacterium |
|  |  |  |  | Sporomusa | Nordella_uncultured bacterium |
|  |  |  |  | Sporosarcina | Opitutae vadinHA64_uncultured bacterium |
|  |  |  |  | Sporotomaculum | P. palm C-A 51_Unclassified |
|  |  |  |  | Staphylococcus | Pedomicrobium_uncultured bacterium |
|  |  |  |  | Starkeya | Pelotomaculum_uncultured bacterium |
|  |  |  |  | Stenotrophomonas | Planctomyces_uncultured planctomycete |
|  |  |  |  | Steroidobacter | Planktothrix_Unclassified |
|  |  |  |  | Streptococcus | Pleomorphomonas_Unclassified |
|  |  |  |  | Streptomyces | Prevotella 7_uncultured bacterium |
|  |  |  |  | Subdoligranulum | Prevotellaceae Ga6A1 group_uncultured bacterium |
|  |  |  |  | Subgroup 11_norank | Propionicicella_Unclassified |
|  |  |  |  | Subgroup 12_norank | Pusillimonas_uncultured bacterium |
|  |  |  |  | Subgroup 17_norank | Reyranella_uncultured bacterium |
|  |  |  |  | Subgroup 22_norank | Rhodanobacter_Unclassified |
|  |  |  |  | Subgroup 2_norank | Rhodococcus_Unclassified |
|  |  |  |  | Subgroup 5_norank | Roseococcus_uncultured bacterium |
|  |  |  |  | Subgroup 6_norank | RsaHf231_uncultured bacterium |
|  |  |  |  | Subgroup 7_norank | Ruminiclostridium_Unclassified |
|  |  |  |  | SubsectionIII_FamilyI_Unclassified | Ruminococcaceae UCG-010_Unclassified |
|  |  |  |  | Succinatimonas | Saccharicrinis_uncultured Bacteroidetes bacterium |
|  |  |  |  | Surface 1_norank | Sandaracinaceae_uncultured bacterium |
|  |  |  |  | Sutterella | Sedimentibacter_uncultured bacterium |
|  |  |  |  | Sva0996 marine group_norank | Shimia_uncultured bacterium |
|  |  |  |  | Synechococcus | Sphingobacterium composti Yoo et al. 2007 |
|  |  |  |  | Synergistaceae_uncultured | Sphingobacterium spiritivorum |
|  |  |  |  | Syntrophaceticus | Sphingobium sp. SYK-6 |
|  |  |  |  | Syntrophococcus | Sporolactobacillaceae_Unclassified |
|  |  |  |  | Syntrophomonadaceae_uncultured | Starkeya novella |
|  |  |  |  | Syntrophomonas | Stenotrophomonas koreensis |
|  |  |  |  | Syntrophorhabdus | Steroidobacter_uncultured bacterium |
|  |  |  |  | TK10_norank | Subgroup 17_uncultured bacterium |
|  |  |  |  | TK85_norank | Subgroup 2_uncultured Acidobacteriaceae bacterium |
|  |  |  |  | TRA3-20_norank | Sva0996 marine group_uncultured bacterium |
|  |  |  |  | Tannerella | Synergistaceae_uncultured bacterium |
|  |  |  |  | Tenacibaculum | Tannerella_uncultured bacterium |
|  |  |  |  | Tepidimicrobium | Thermoactinomyces vulgaris |
|  |  |  |  | Tepidisphaeraceae_norank | Xanthomonadales Incertae Sedis_uncultured gamma proteobacterium |
|  |  |  |  | Terrisporobacter | [Clostridium] cocleatum |
|  |  |  |  | Thalassobius | [Eubacterium] eligens group_uncultured bacterium |
|  |  |  |  | Thermoactinomyces | hgcI clade_uncultured bacterium |
|  |  |  |  | Thermoanaerobacteraceae_uncultured | p-1088-a5 gut group_uncultured bacterium |
|  |  |  |  | Thermoflavimicrobium | 0319-6M6_uncultured bacterium |
|  |  |  |  | Thermomonas | 11-24_uncultured Acidobacteria bacterium |
|  |  |  |  | Thermosporothrix | 11-24_uncultured bacterium |
|  |  |  |  | Thiobacillus | Acetobacteraceae_Unclassified |
|  |  |  |  | Timonella | Acidaminococcus_uncultured bacterium |
|  |  |  |  | Treponema 2 | Acidobacteriaceae (Subgroup 1)_Unclassified |
|  |  |  |  | Trichococcus | Alicyclobacillus acidoterrestris |
|  |  |  |  | Truepera | Amycolatopsis_uncultured bacterium |
|  |  |  |  | Tumebacillus | Arachidicoccus_uncultured bacterium |
|  |  |  |  | Turicibacter | Arcticibacter_Unclassified |
|  |  |  |  | Tyzzerella | Aureimonas frigidaquae |
|  |  |  |  | Tyzzerella 3 | Azovibrio_uncultured bacterium |
|  |  |  |  | Unclassified | B1-7BS_Unclassified |
|  |  |  |  | Variibacter | B1-7BS_uncultured bacterium |
|  |  |  |  | Vasilyevaea | B1-7BS_uncultured beta proteobacterium |
|  |  |  |  | Veillonella | BPS-CK174_uncultured Alteromonadaceae bacterium |
|  |  |  |  | Veillonellaceae_uncultured | Bacteroidales S24-7 group_Unclassified |
|  |  |  |  | Vibrio | Barnesiella_uncultured bacterium |
|  |  |  |  | Victivallis | Bhargavaea cecembensis |
|  |  |  |  | Vitreoscilla | Bilophila_Unclassified |
|  |  |  |  | WS2_norank | Blastocatella_uncultured bacterium |
|  |  |  |  | Weissella | Blastocatellaceae (Subgroup 4)_uncultured Acidobacteria bacterium |
|  |  |  |  | Winogradskyella | Blastococcus_uncultured bacterium |
|  |  |  |  | Wolbachia | Blastopirellula_uncultured bacterium |
|  |  |  |  | Xanthobacteraceae_uncultured | Bythopirellula_Unclassified |
|  |  |  |  | Xanthomonadaceae_uncultured | Camelimonas_uncultured bacterium |
|  |  |  |  | Xanthomonadales Incertae Sedis_uncultured | Candidatus Competibacter_uncultured bacterium |
|  |  |  |  | Xanthomonadales_norank | Cellvibrio_Unclassified |
|  |  |  |  | Zoogloea | Cerasibacillus quisquiliarum |
|  |  |  |  | Zymobacter | Chryseobacterium_uncultured bacterium |
|  |  |  |  | Zymomonas | Clostridium sensu stricto 3_uncultured bacterium |
|  |  |  |  | [Acetivibrio] ethanolgignens group | Conexibacter arvalis |
|  |  |  |  | [Clostridium] innocuum group | Coprococcus 3_Unclassified |
|  |  |  |  | [Eubacterium] brachy group | Dermabacteraceae_Unclassified |
|  |  |  |  | [Eubacterium] coprostanoligenes group | Desulfobotulus sapovorans |
|  |  |  |  | [Eubacterium] eligens group | Desulfosporosinus_Unclassified |
|  |  |  |  | [Eubacterium] fissicatena group | Desulfuromonas_uncultured bacterium |
|  |  |  |  | [Eubacterium] hallii group | Dialister_uncultured bacterium |
|  |  |  |  | [Eubacterium] nodatum group | Dongia_uncultured bacterium |
|  |  |  |  | [Eubacterium] ventriosum group | Dyadobacter_Unclassified |
|  |  |  |  | [Eubacterium] xylanophilum group | Eggerthella_uncultured Gordonibacter sp. |
|  |  |  |  | [Ruminococcus] gauvreauii group | Elev-16S-1332_uncultured bacterium |
|  |  |  |  | [Ruminococcus] torques group | Empedobacter brevis |
|  |  |  |  | env.OPS 17_norank | Empedobacter_uncultured bacterium |
|  |  |  |  | hgcI clade | Ensifer_Unclassified |
|  |  |  |  | p-1088-a5 gut group | Family XI_uncultured bacterium |
|  |  |  |  |  | Ferruginibacter_Unclassified |
|  |  |  |  |  | Fimbriimonadaceae_uncultured bacterium |
|  |  |  |  |  | Fluviicola_uncultured bacterium |
|  |  |  |  |  | Fusobacterium_uncultured organism |
|  |  |  |  |  | GAL15_uncultured bacterium |
|  |  |  |  |  | Gaiella_uncultured actinobacterium |
|  |  |  |  |  | Gallicola_uncultured bacterium |
|  |  |  |  |  | Gemmata_Unclassified |
|  |  |  |  |  | Geobacter_uncultured bacterium |
|  |  |  |  |  | Geothrix_uncultured bacterium |
|  |  |  |  |  | Gilvibacter sediminis |
|  |  |  |  |  | Gordonia_Unclassified |
|  |  |  |  |  | Granulicella_uncultured bacterium |
|  |  |  |  |  | Gsoil-1167_uncultured bacterium |
|  |  |  |  |  | H16_Unclassified |
|  |  |  |  |  | HTA4_uncultured bacterium |
|  |  |  |  |  | Haliangium_uncultured bacterium |
|  |  |  |  |  | Hyaloperonospora arabidopsidis |
|  |  |  |  |  | Hymenobacter_uncultured bacterium |
|  |  |  |  |  | JTB215_Unclassified |
|  |  |  |  |  | KCM-B-60_Unclassified |
|  |  |  |  |  | Ketogulonicigenium vulgare Y25 |
|  |  |  |  |  | Kroppenstedtia_Unclassified |
|  |  |  |  |  | Lachnospiraceae ND3007 group_uncultured bacterium |
|  |  |  |  |  | Larkinella_Unclassified |
|  |  |  |  |  | Leptotrichia shahii |
|  |  |  |  |  | Longispora_uncultured bacterium |
|  |  |  |  |  | MB-A2-108_uncultured bacterium |
|  |  |  |  |  | ML635J-21_Unclassified |
|  |  |  |  |  | MSB-1E8_uncultured bacterium |
|  |  |  |  |  | Macellibacteroides_Unclassified |
|  |  |  |  |  | Methylocystis_Unclassified |
|  |  |  |  |  | Micromonosporaceae_Unclassified |
|  |  |  |  |  | Mycoplasmataceae_uncultured Firmicutes bacterium |
|  |  |  |  |  | NB1-j_Unclassified |
|  |  |  |  |  | NB1-j_uncultured bacterium |
|  |  |  |  |  | NS11-12 marine group_uncultured bacterium |
|  |  |  |  |  | NS3a marine group_Unclassified |
|  |  |  |  |  | Nakamurella_uncultured bacterium |
|  |  |  |  |  | Nitrosomonas_Unclassified |
|  |  |  |  |  | Nitrosomonas_uncultured bacterium |
|  |  |  |  |  | Nitrospiraceae_uncultured bacterium |
|  |  |  |  |  | Nubsella zeaxanthinifaciens |
|  |  |  |  |  | Obscuribacterales_uncultured bacterium |
|  |  |  |  |  | Odoribacter splanchnicus DSM 20712 |
|  |  |  |  |  | Paludibaculum_uncultured bacterium |
|  |  |  |  |  | Parasphingopyxis_Unclassified |
|  |  |  |  |  | Pediococcus pentosaceus |
|  |  |  |  |  | Pedobacter_Unclassified |
|  |  |  |  |  | Planctomyces_uncultured marine bacterium |
|  |  |  |  |  | Planctomycetaceae_Unclassified |
|  |  |  |  |  | Polaromonas_uncultured bacterium |
|  |  |  |  |  | Prevotella 7_uncultured organism |
|  |  |  |  |  | Prevotellaceae UCG-004_uncultured bacterium |
|  |  |  |  |  | Prevotellaceae_uncultured bacterium |
|  |  |  |  |  | Prolixibacter_uncultured bacterium |
|  |  |  |  |  | Propionigenium_Unclassified |
|  |  |  |  |  | Proteocatella_uncultured bacterium |
|  |  |  |  |  | Pseudoxanthomonas_Unclassified |
|  |  |  |  |  | Psychrobium_uncultured gamma proteobacterium |
|  |  |  |  |  | Psychroflexus_uncultured organism |
|  |  |  |  |  | RB41_uncultured bacterium |
|  |  |  |  |  | Rhizomicrobium_uncultured bacterium |
|  |  |  |  |  | Rhodobacteraceae_uncultured bacterium |
|  |  |  |  |  | Rhodobium_Unclassified |
|  |  |  |  |  | Rs-D38 termite group_Unclassified |
|  |  |  |  |  | Rubritepida_Unclassified |
|  |  |  |  |  | Ruminococcaceae_uncultured Ruminococcaceae bacterium |
|  |  |  |  |  | S-70_uncultured bacterium |
|  |  |  |  |  | SBR2076_uncultured bacterium |
|  |  |  |  |  | SC-I-84_Unclassified |
|  |  |  |  |  | Saccharibacillus_Unclassified |
|  |  |  |  |  | Salinarimonas_Unclassified |
|  |  |  |  |  | Saprospiraceae_uncultured bacterium |
|  |  |  |  |  | Singulisphaera_uncultured bacterium |
|  |  |  |  |  | Siphonobacter_Unclassified |
|  |  |  |  |  | Skermanella_uncultured bacterium |
|  |  |  |  |  | Sorangium_uncultured bacterium |
|  |  |  |  |  | Sphingobacteriales_uncultured bacterium |
|  |  |  |  |  | Sphingorhabdus_Unclassified |
|  |  |  |  |  | Spirosoma_Unclassified |
|  |  |  |  |  | Subgroup 22_uncultured Acidobacteria bacterium |
|  |  |  |  |  | SubsectionIII_FamilyI_Unclassified |
|  |  |  |  |  | Sutterella_uncultured organism |
|  |  |  |  |  | Syntrophomonadaceae_Unclassified |
|  |  |  |  |  | Syntrophorhabdus_uncultured bacterium |
|  |  |  |  |  | TK10_uncultured bacterium |
|  |  |  |  |  | TRA3-20_uncultured bacterium |
|  |  |  |  |  | Thermoflavimicrobium_Unclassified |
|  |  |  |  |  | Vasilyevaea_Unclassified |
|  |  |  |  |  | Veillonellaceae_Unclassified |
|  |  |  |  |  | Victivallis_Unclassified |
|  |  |  |  |  | Vitreoscilla_Unclassified |
|  |  |  |  |  | WS2_uncultured bacterium |
|  |  |  |  |  | Weissella ceti |
|  |  |  |  |  | Zoogloea_Unclassified |
|  |  |  |  |  | Zymomonas_uncultured bacterium |
|  |  |  |  |  | [Eubacterium] coprostanoligenes group_Unclassified |
|  |  |  |  |  | bacterium endosymbiont of Onthophagus Taurus |
|  |  |  |  |  | 0319-6G20_uncultured bacterium |
|  |  |  |  |  | Acidibacter_uncultured gamma proteobacterium |
|  |  |  |  |  | Acidimicrobiales_Unclassified |
|  |  |  |  |  | Acidiphilium_uncultured bacterium |
|  |  |  |  |  | Afipia_uncultured bacterium |
|  |  |  |  |  | Alloprevotella_Unclassified |
|  |  |  |  |  | Alsobacter_Unclassified |
|  |  |  |  |  | Amycolatopsis ruanii |
|  |  |  |  |  | Anaerostipes_uncultured bacterium |
|  |  |  |  |  | Armatimonadetes_uncultured bacterium |
|  |  |  |  |  | Asticcacaulis excentricus |
|  |  |  |  |  | BSV26_uncultured bacterium |
|  |  |  |  |  | Bacteroidales_Unclassified |
|  |  |  |  |  | Bifidobacterium_Unclassified |
|  |  |  |  |  | CCM11a_uncultured bacterium |
|  |  |  |  |  | Catenibacterium_uncultured bacterium |
|  |  |  |  |  | Cellulosilyticum_uncultured bacterium |
|  |  |  |  |  | Cetobacterium_uncultured bacterium |
|  |  |  |  |  | Chitinophaga_Unclassified |
|  |  |  |  |  | Citrobacter_uncultured organism |
|  |  |  |  |  | Comamonas_Unclassified |
|  |  |  |  |  | Coprobacter_Unclassified |
|  |  |  |  |  | Cytophaga_uncultured bacterium |
|  |  |  |  |  | Cytophagaceae_Unclassified |
|  |  |  |  |  | DA111_Unclassified |
|  |  |  |  |  | Defluviitoga_Unclassified |
|  |  |  |  |  | Dinghuibacter_uncultured bacterium |
|  |  |  |  |  | Enterobacteriaceae_Unclassified |
|  |  |  |  |  | FCPS473_Unclassified |
|  |  |  |  |  | Formosa_Unclassified |
|  |  |  |  |  | Francisella sp. TX077308 |
|  |  |  |  |  | Gammaproteobacteria_Unclassified |
|  |  |  |  |  | Gemmatimonas_uncultured bacterium |
|  |  |  |  |  | Gracilibacteraceae_uncultured bacterium |
|  |  |  |  |  | Granulosicoccus_uncultured bacterium |
|  |  |  |  |  | Holdemanella_uncultured bacterium |
|  |  |  |  |  | Holophagaceae_uncultured bacterium |
|  |  |  |  |  | Hyphomicrobiaceae_Unclassified |
|  |  |  |  |  | I-10_uncultured bacterium |
|  |  |  |  |  | Iamia_uncultured bacterium |
|  |  |  |  |  | JG30-KF-AS9_Unclassified |
|  |  |  |  |  | JG30-KF-CM66_uncultured bacterium |
|  |  |  |  |  | KD3-93_uncultured bacterium |
|  |  |  |  |  | Komagataeibacter_Unclassified |
|  |  |  |  |  | Lactobacillus reuteri TD1 |
|  |  |  |  |  | Leptolinea_uncultured soil bacterium |
|  |  |  |  |  | MSBL9_uncultured bacterium |
|  |  |  |  |  | Marinicella_uncultured gamma proteobacterium |
|  |  |  |  |  | Megasphaera_Unclassified |
|  |  |  |  |  | Modestobacter_Unclassified |
|  |  |  |  |  | Mycoplasma microti |
|  |  |  |  |  | NS9 marine group_Unclassified |
|  |  |  |  |  | Naumannella_Unclassified |
|  |  |  |  |  | Nitriliruptoraceae_Unclassified |
|  |  |  |  |  | OPB56_uncultured bacterium |
|  |  |  |  |  | PHOS-HE36_uncultured bacterium |
|  |  |  |  |  | Paenibacillus_uncultured Firmicutes bacterium |
|  |  |  |  |  | Parabacteroides_uncultured Porphyromonadaceae bacterium |
|  |  |  |  |  | Pelosinus_Unclassified |
|  |  |  |  |  | Peredibacter_uncultured Bacteriovorax sp. |
|  |  |  |  |  | Peregrinibacteria_Unclassified |
|  |  |  |  |  | Petrimonas_Unclassified |
|  |  |  |  |  | Prevotella 9_Unclassified |
|  |  |  |  |  | Proteiniclasticum_uncultured bacterium |
|  |  |  |  |  | Psychromonas agarivorans |
|  |  |  |  |  | Pyramidobacter piscolens |
|  |  |  |  |  | Rs-E47 termite group_uncultured bacterium |
|  |  |  |  |  | Rubellimicrobium_uncultured bacterium |
|  |  |  |  |  | Ruminococcaceae UCG-003_Unclassified |
|  |  |  |  |  | Ruminococcaceae UCG-011_uncultured bacterium |
|  |  |  |  |  | Ruminococcus 2_Unclassified |
|  |  |  |  |  | Ruminococcus champanellensis 18P13 = JCM 17042 |
|  |  |  |  |  | SJA-15_uncultured bacterium |
|  |  |  |  |  | Saccharomonospora_Unclassified |
|  |  |  |  |  | Salana_Unclassified |
|  |  |  |  |  | Sandaracinaceae_uncultured delta proteobacterium |
|  |  |  |  |  | Sh765B-TzT-35_Unclassified |
|  |  |  |  |  | Shewanella_uncultured bacterium |
|  |  |  |  |  | Shimwellia_uncultured bacterium |
|  |  |  |  |  | Singulisphaera_uncultured Planctomycetales bacterium |
|  |  |  |  |  | Sinomonas_Unclassified |
|  |  |  |  |  | Solitalea_uncultured bacterium |
|  |  |  |  |  | Spirochaeta 2_Unclassified |
|  |  |  |  |  | Spongiimonas_Unclassified |
|  |  |  |  |  | Sporomusa acidovorans |
|  |  |  |  |  | Subgroup 12_uncultured bacterium |
|  |  |  |  |  | Succinatimonas hippei |
|  |  |  |  |  | Surface 1_uncultured bacterium |
|  |  |  |  |  | TK85_uncultured bacterium |
|  |  |  |  |  | Tepidisphaeraceae_uncultured planctomycete |
|  |  |  |  |  | Thermosporothrix_uncultured bacterium |
|  |  |  |  |  | Timonella_uncultured bacterium |
|  |  |  |  |  | Treponema 2_Unclassified |
|  |  |  |  |  | Truepera_uncultured bacterium |
|  |  |  |  |  | Tumebacillus_Unclassified |
|  |  |  |  |  | Xanthomonadaceae_uncultured bacterium |
|  |  |  |  |  | env.OPS 17_uncultured bacterium |
|  |  |  |  |  | Alistipes_uncultured bacterium |
|  |  |  |  |  | Alloprevotella_uncultured bacterium |
|  |  |  |  |  | Bacteroidales S24-7 group_uncultured bacterium |
|  |  |  |  |  | Bacteroides_uncultured bacterium |
|  |  |  |  |  | Lachnospiraceae NK4A136 group_uncultured bacterium |
|  |  |  |  |  | Lachnospiraceae_uncultured bacterium |
|  |  |  |  |  | Lactobacillus_uncultured bacterium |
|  |  |  |  |  | Ruminiclostridium 9_uncultured bacterium |
