# Supplementary material for: Bacterial Atlas of Mouse Gut Microbiota
Source: Hindawi journal article supplement (doi:10.1155/2022/5968814), 2022-04-11
Supplement: f3 [file 5968814.f3.docx]

| **Table S3. The known operational taxonomic units (OTUs) of mouse gut microbiota at the genus level.** |
| --- |
| 0319-6A21_norank |
| 0319-6G20_norank |
| 0319-6M6_norank |
| 1013-28-CG33_norank |
| 44524 |
| 12up |
| ABS-19_norank |
| Acetanaerobacterium |
| Acetatifactor |
| Acetitomaculum |
| Acetobacteraceae_uncultured |
| Acetonema |
| Achromobacter |
| Acidaminococcus |
| Acidibacter |
| Acidimicrobiaceae_uncultured |
| Acidimicrobiales_norank |
| Acidiphilium |
| Acidobacteriaceae (Subgroup 1)_uncultured |
| Acidothermus |
| Acinetobacter |
| Aerococcus |
| Aeromicrobium |
| Aeromonas |
| Aerosphaera |
| Afipia |
| Agromyces |
| Akkermansia |
| Alcaligenaceae_uncultured |
| Alicyclobacillus |
| Aliihoeflea |
| Alistipes |
| Alkaliphilus |
| Alkanindiges |
| Allobaculum |
| Alloprevotella |
| Alsobacter |
| Altererythrobacter |
| Amycolatopsis |
| Anaerofustis |
| Anaerolineaceae_uncultured |
| Anaeromyxobacter |
| Anaeroplasma |
| Anaerosalibacter |
| Anaerospora |
| Anaerosporobacter |
| Anaerosporomusa |
| Anaerostipes |
| Anaerotruncus |
| Anaerovorax |
| Aquamicrobium |
| Arachidicoccus |
| Arcticibacter |
| Arenimonas |
| Armatimonadetes_norank |
| Arthrobacter |
| Asaia |
| Asanoa |
| Asticcacaulis |
| Atopostipes |
| Aureimonas |
| Azospirillum |
| Azovibrio |
| B1-7BS_norank |
| BD1-7 clade |
| BD7-11_norank |
| BPS-CK174_norank |
| BSV26_norank |
| Bacillus |
| Bacteroidales S24-7 group_norank |
| Bacteroides |
| Barnesiella |
| Beijerinckiaceae_uncultured |
| Bergeyella |
| Bhargavaea |
| Bifidobacterium |
| Bilophila |
| Blastocatella |
| Blastocatellaceae (Subgroup 4)_uncultured |
| Blastococcus |
| Blastopirellula |
| Blautia |
| Bosea |
| Brachybacterium |
| Bradyrhizobium |
| Brevibacillus |
| Brevibacterium |
| Brevundimonas |
| Breznakia |
| Bryobacter |
| Burkholderia-Paraburkholderia |
| Butyricicoccus |
| Butyricimonas |
| Bythopirellula |
| CCM11a_norank |
| Camelimonas |
| Candidatus Actinomarina |
| Candidatus Arthromitus |
| Candidatus Bacilloplasma |
| Candidatus Competibacter |
| Candidatus Hepatoplasma |
| Candidatus Saccharimonas |
| Candidatus Soleaferrea |
| Candidatus Stoquefichus |
| Caproiciproducens |
| Carboxylicivirga |
| Catenibacterium |
| Caulobacter |
| Caulobacteraceae_uncultured |
| Cellulosilyticum |
| Cellulosimicrobium |
| Cellvibrio |
| Cerasibacillus |
| Cetobacterium |
| Chitinophaga |
| Chitinophagaceae_uncultured |
| Christensenella |
| Christensenellaceae R-7 group |
| Christensenellaceae_uncultured |
| Chryseobacterium |
| Citrobacter |
| Cloacibacterium |
| Clostridiales vadinBB60 group_norank |
| Clostridium sensu stricto 1 |
| Clostridium sensu stricto 13 |
| Clostridium sensu stricto 15 |
| Clostridium sensu stricto 18 |
| Clostridium sensu stricto 3 |
| Clostridium sensu stricto 7 |
| Collinsella |
| Colwellia |
| Comamonadaceae_uncultured |
| Comamonas |
| Conexibacter |
| Coprobacter |
| Coprococcus 1 |
| Coprococcus 2 |
| Coprococcus 3 |
| Coriobacteriaceae UCG-002 |
| Coriobacteriaceae_uncultured |
| Corynebacterium |
| Corynebacterium 1 |
| Cyanobacteria_norank |
| Cytophaga |
| Cytophagaceae_uncultured |
| D8A-2_norank |
| DA111_norank |
| DS-100 |
| Dechlorobacter |
| Dechloromonas |
| Defluviitaleaceae UCG-011 |
| Defluviitoga |
| Dehalobacter |
| Delftia |
| Demequina |
| Dendrosporobacter |
| Denitratisoma |
| Dermabacteraceae_uncultured |
| Desemzia |
| Desulfobotulus |
| Desulfosporosinus |
| Desulfotomaculum |
| Desulfovibrio |
| Desulfovibrionaceae_uncultured |
| Desulfuromonas |
| Devosia |
| Dialister |
| Dietzia |
| Dinghuibacter |
| Donghicola |
| Dongia |
| Dyadobacter |
| Dysgonomonas |
| Eggerthella |
| Eisenbergiella |
| Elev-16S-1332_norank |
| Empedobacter |
| Enhydrobacter |
| Ensifer |
| Enteractinococcus |
| Enterococcus |
| Enterorhabdus |
| Erysipelatoclostridium |
| Erysipelotrichaceae UCG-003 |
| Erysipelotrichaceae_uncultured |
| Erythrobacter |
| Escherichia-Shigella |
| Exiguobacterium |
| FCPS473_norank |
| FFCH13075_norank |
| Facklamia |
| Faecalibacterium |
| Faecalibaculum |
| Family XIII AD3011 group |
| Family XIII UCG-001 |
| Family XIII UCG-002 |
| Family XIII_uncultured |
| Family XI_uncultured |
| Ferruginibacter |
| Fimbriimonadaceae_norank |
| Flavobacteriaceae_uncultured |
| Flavobacterium |
| Flavonifractor |
| Fluviicola |
| Formosa |
| Francisella |
| Fusibacter |
| Fusobacterium |
| GAL15_norank |
| Gaiella |
| Gaiellales_norank |
| Gallicola |
| Gammaproteobacteria Incertae Sedis_uncultured |
| Gastranaerophilales_norank |
| Gelria |
| Gemmata |
| Gemmatimonadaceae_uncultured |
| Gemmatimonas |
| Geobacillus |
| Geobacter |
| Georgenia |
| Geothrix |
| Gilvibacter |
| Glutamicibacter |
| Gordonia |
| Gordonibacter |
| Gracilibacteraceae_uncultured |
| Gramella |
| Granulicella |
| Granulosicoccus |
| Gsoil-1167_norank |
| H16 |
| HTA4_norank |
| Hados.Sed.Eubac.3_norank |
| Haliangium |
| Halobacillus |
| Halobacteroidaceae_uncultured |
| Halomonas |
| Hathewaya |
| Helicobacter |
| Herbiconiux |
| Holdemanella |
| Holdemania |
| Holophagaceae_uncultured |
| Hydrogenispora |
| Hydrogenoanaerobacterium |
| Hydrogenophaga |
| Hymenobacter |
| Hyphomicrobium |
| I-10_norank |
| Iamia |
| Intestinibacter |
| JG30-KF-AS9_norank |
| JG30-KF-CM45_norank |
| JG30-KF-CM66_norank |
| JG30a-KF-32_norank |
| JTB215_norank |
| Janibacter |
| Jeotgalicoccus |
| KCM-B-60_norank |
| KD3-93_norank |
| KD4-96_norank |
| KF-JG30-B3_norank |
| Ketogulonicigenium |
| Klebsiella |
| Komagataeibacter |
| Kroppenstedtia |
| Lachnoclostridium |
| Lachnoclostridium 12 |
| Lachnoclostridium 5 |
| Lachnospira |
| Lachnospiraceae FCS020 group |
| Lachnospiraceae ND3007 group |
| Lachnospiraceae NK4A136 group |
| Lachnospiraceae NK4B4 group |
| Lachnospiraceae UCG-001 |
| Lachnospiraceae UCG-006 |
| Lachnospiraceae UCG-008 |
| Lachnospiraceae UCG-009 |
| Lachnospiraceae UCG-010 |
| Lachnospiraceae XPB1014 group |
| Lachnospiraceae_uncultured |
| Lactobacillus |
| Lactococcus |
| Larkinella |
| Latescibacteria_norank |
| Leifsonia |
| Leptolinea |
| Leptospira |
| Leptotrichia |
| Leptotrichiaceae_uncultured |
| Leucobacter |
| Leuconostoc |
| Longilinea |
| Longispora |
| Luteimonas |
| Lysinibacillus |
| Lysinimonas |
| Lysobacter |
| MB-A2-108_norank |
| ML635J-21_norank |
| MNG7_norank |
| MSB-1E8_norank |
| MSBL9_norank |
| Macellibacteroides |
| Marinicella |
| Mariniradius |
| Marvinbryantia |
| Massilia |
| Megamonas |
| Megasphaera |
| Merismopedia |
| Mesoflavibacter |
| Mesorhizobium |
| Methylobacterium |
| Methylocystis |
| Microbacterium |
| Micrococcus |
| Microlunatus |
| Micromonospora |
| Microvirga |
| Mizugakiibacter |
| Mobilitalea |
| Modestobacter |
| Moheibacter |
| Mollicutes RF9_norank |
| Mucinivorans |
| Mucispirillum |
| Muricoccus |
| Mycobacterium |
| Mycoplasma |
| Mycoplasmataceae_uncultured |
| Myroides |
| NB1-j_norank |
| NS11-12 marine group_norank |
| NS2b marine group |
| NS3a marine group |
| NS9 marine group_norank |
| Nakamurella |
| Naumannella |
| Neisseria |
| Neisseriaceae_uncultured |
| Nitrosomonadaceae_uncultured |
| Nitrosomonas |
| Nitrospira |
| Nitrospiraceae_uncultured |
| Nocardia |
| Nocardioides |
| Nordella |
| Novosphingobium |
| Nubsella |
| OM190_norank |
| OPB56_norank |
| Obscuribacterales_norank |
| Oceanisphaera |
| Oceanobacterium |
| Ochrobactrum |
| Odoribacter |
| Oligella |
| Olsenella |
| Opitutae vadinHA64_norank |
| Opitutus |
| Oscillibacter |
| P. palm C-A 51_norank |
| PHOS-HE36_norank |
| PHOS-HE51_norank |
| Paenalcaligenes |
| Paenarthrobacter |
| Paenibacillus |
| Paeniclostridium |
| Paludibaculum |
| Pandoraea |
| Pannonibacter |
| Pantoea |
| Papillibacter |
| Parabacteroides |
| Paracoccus |
| Paraprevotella |
| Parasphingopyxis |
| Parasutterella |
| Parvibacter |
| Pasteurella |
| PeM15_norank |
| Pediococcus |
| Pedobacter |
| Pedomicrobium |
| Pelagibacterium |
| Pelosinus |
| Pelospora |
| Pelotomaculum |
| Peptoclostridium |
| Peptococcaceae_uncultured |
| Peptococcus |
| Peptostreptococcus |
| Peredibacter |
| Peregrinibacteria_norank |
| Petrimonas |
| Phascolarctobacterium |
| Phenylobacterium |
| Photobacterium |
| Pigmentiphaga |
| Pirellula |
| Planctomyces |
| Planctomycetaceae_uncultured |
| Planktothrix |
| Pleomorphomonas |
| Polaribacter 2 |
| Polaromonas |
| Prevotella 1 |
| Prevotella 7 |
| Prevotella 9 |
| Prevotellaceae Ga6A1 group |
| Prevotellaceae NK3B31 group |
| Prevotellaceae UCG-001 |
| Prevotellaceae UCG-004 |
| Prevotellaceae_uncultured |
| Prolixibacter |
| Promicromonospora |
| Propionibacterium |
| Propionicicella |
| Propionigenium |
| Propionispora |
| Proteiniclasticum |
| Proteocatella |
| Proteus |
| Providencia |
| Pseudoalteromonas |
| Pseudobacteroides |
| Pseudochrobactrum |
| Pseudomonas |
| Pseudonocardia |
| Pseudoxanthomonas |
| Psychrobacter |
| Psychrobium |
| Psychroflexus |
| Psychromonas |
| Pusillimonas |
| Pyramidobacter |
| RB41 |
| Ralstonia |
| Reyranella |
| Rhizobacter |
| Rhizobium |
| Rhizomicrobium |
| Rhodanobacter |
| Rhodobacter |
| Rhodobacteraceae_uncultured |
| Rhodobiaceae_uncultured |
| Rhodobium |
| Rhodococcus |
| Rhodospirillaceae_uncultured |
| Rikenella |
| Rikenellaceae RC9 gut group |
| Romboutsia |
| Roseburia |
| Roseiflexus |
| Roseococcus |
| Roseomonas |
| Rs-D38 termite group |
| Rs-E47 termite group_norank |
| RsaHf231_norank |
| Rubellimicrobium |
| Rubritepida |
| Ruminiclostridium |
| Ruminiclostridium 1 |
| Ruminiclostridium 5 |
| Ruminiclostridium 6 |
| Ruminiclostridium 9 |
| Ruminococcaceae NK4A214 group |
| Ruminococcaceae UCG-001 |
| Ruminococcaceae UCG-002 |
| Ruminococcaceae UCG-003 |
| Ruminococcaceae UCG-005 |
| Ruminococcaceae UCG-009 |
| Ruminococcaceae UCG-010 |
| Ruminococcaceae UCG-011 |
| Ruminococcaceae UCG-013 |
| Ruminococcaceae UCG-014 |
| Ruminococcaceae_uncultured |
| Ruminococcus 1 |
| Ruminococcus 2 |
| S-70_norank |
| SBR2076_norank |
| SC-I-84_norank |
| SJA-15_norank |
| Saccharibacillus |
| Saccharicrinis |
| Saccharomonospora |
| Saccharopolyspora |
| Salana |
| Salinarimonas |
| Sandaracinaceae_uncultured |
| Saprospiraceae_uncultured |
| Sedimentibacter |
| Selenomonadales_norank |
| Sellimonas |
| Senegalimassilia |
| Serratia |
| Sh765B-TzT-35_norank |
| Shewanella |
| Shimia |
| Shimwellia |
| Singulisphaera |
| Sinomonas |
| Siphonobacter |
| Skermanella |
| Solibacillus |
| Solirubrobacter |
| Solitalea |
| Sorangium |
| Sphingobacteriales_norank |
| Sphingobacterium |
| Sphingobium |
| Sphingomonas |
| Sphingorhabdus |
| Spirochaeta 2 |
| Spirosoma |
| Spongiimonas |
| Sporobacter |
| Sporolactobacillaceae_uncultured |
| Sporomusa |
| Sporosarcina |
| Sporotomaculum |
| Staphylococcus |
| Starkeya |
| Stenotrophomonas |
| Steroidobacter |
| Streptococcus |
| Streptomyces |
| Subdoligranulum |
| Subgroup 11_norank |
| Subgroup 12_norank |
| Subgroup 17_norank |
| Subgroup 22_norank |
| Subgroup 2_norank |
| Subgroup 5_norank |
| Subgroup 6_norank |
| Subgroup 7_norank |
| Succinatimonas |
| Surface 1_norank |
| Sutterella |
| Sva0996 marine group_norank |
| Synechococcus |
| Synergistaceae_uncultured |
| Syntrophaceticus |
| Syntrophococcus |
| Syntrophomonadaceae_uncultured |
| Syntrophomonas |
| Syntrophorhabdus |
| TK10_norank |
| TK85_norank |
| TRA3-20_norank |
| Tannerella |
| Tenacibaculum |
| Tepidimicrobium |
| Tepidisphaeraceae_norank |
| Terrisporobacter |
| Thalassobius |
| Thermoactinomyces |
| Thermoanaerobacteraceae_uncultured |
| Thermoflavimicrobium |
| Thermomonas |
| Thermosporothrix |
| Thiobacillus |
| Timonella |
| Treponema 2 |
| Trichococcus |
| Truepera |
| Tumebacillus |
| Turicibacter |
| Tyzzerella |
| Tyzzerella 3 |
| Variibacter |
| Vasilyevaea |
| Veillonella |
| Veillonellaceae_uncultured |
| Vibrio |
| Victivallis |
| Vitreoscilla |
| WS2_norank |
| Weissella |
| Winogradskyella |
| Wolbachia |
| Xanthobacteraceae_uncultured |
| Xanthomonadaceae_uncultured |
| Xanthomonadales Incertae Sedis_uncultured |
| Xanthomonadales_norank |
| Zoogloea |
| Zymobacter |
| Zymomonas |
| [Acetivibrio] ethanolgignens group |
| [Clostridium] innocuum group |
| [Eubacterium] brachy group |
| [Eubacterium] coprostanoligenes group |
| [Eubacterium] eligens group |
| [Eubacterium] fissicatena group |
| [Eubacterium] hallii group |
| [Eubacterium] nodatum group |
| [Eubacterium] ventriosum group |
| [Eubacterium] xylanophilum group |
| [Ruminococcus] gauvreauii group |
| [Ruminococcus] torques group |
| env.OPS 17_norank |
| hgcI clade |
| p-1088-a5 gut group |
