# Supplementary material for: Bacterial Atlas of Mouse Gut Microbiota
Source: Hindawi journal article supplement (doi:10.1155/2022/5968814), 2022-04-11
Supplement: f4 [file 5968814.f4.docx]

**Table S4. Sequencing data of human gut microbiota.**

| NCBI accession number | | | | |
| --- | --- | --- | --- | --- |
| DRR048993 | DRR067941 | DRR049358 | DRR068293 | DRR049223 |
| DRR048994 | DRR067942 | DRR049359 | DRR068294 | DRR049224 |
| DRR048995 | DRR067943 | DRR049360 | DRR068295 | DRR049225 |
| DRR048996 | DRR067944 | DRR049361 | DRR068296 | DRR049226 |
| DRR048997 | DRR067945 | DRR049362 | DRR068297 | DRR049227 |
| DRR048998 | DRR067946 | DRR049363 | DRR068298 | DRR049228 |
| DRR048999 | DRR067947 | DRR092005 | DRR068299 | DRR049229 |
| DRR049000 | DRR067948 | DRR092006 | DRR068300 | DRR049230 |
| DRR049002 | DRR067949 | DRR092007 | DRR068301 | DRR049231 |
| DRR049003 | DRR067950 | DRR092008 | DRR068302 | DRR049232 |
| DRR049004 | DRR067951 | DRR092009 | DRR068303 | DRR049233 |
| DRR049005 | DRR067952 | DRR092010 | DRR068304 | DRR049234 |
| DRR049006 | DRR067953 | DRR092011 | DRR068305 | DRR049235 |
| DRR049007 | DRR067954 | DRR092012 | DRR068306 | DRR049236 |
| DRR049008 | DRR067955 | DRR092013 | DRR068307 | DRR049237 |
| DRR049009 | DRR067956 | DRR092014 | DRR068308 | DRR049238 |
| DRR049010 | DRR067957 | DRR092015 | DRR068309 | DRR049239 |
| DRR049011 | DRR067958 | DRR092016 | DRR068310 | DRR049240 |
| DRR049012 | DRR067959 | DRR092017 | DRR068311 | DRR049241 |
| DRR049013 | DRR067960 | DRR092018 | DRR068312 | DRR049242 |
| DRR049014 | DRR067961 | DRR092019 | DRR068313 | DRR049243 |
| DRR049015 | DRR067962 | DRR092020 | DRR068314 | DRR049244 |
| DRR049016 | DRR067963 | DRR092021 | DRR068315 | DRR049245 |
| DRR049017 | DRR067964 | DRR092022 | DRR068316 | DRR049246 |
| DRR049018 | DRR067965 | DRR092023 | DRR068317 | DRR049247 |
| DRR049019 | DRR067966 | DRR092024 | DRR068318 | DRR049248 |
| DRR049020 | DRR067967 | DRR092025 | DRR068319 | DRR049249 |
| DRR049021 | DRR067968 | DRR092026 | DRR068320 | DRR049250 |
| DRR049022 | DRR067969 | DRR092027 | DRR068321 | DRR049251 |
| DRR049023 | DRR067970 | DRR092028 | DRR068322 | DRR049283 |
| DRR049024 | DRR067971 | DRR092029 | DRR068323 | DRR049284 |
| DRR049025 | DRR067972 | DRR092030 | DRR068324 | DRR049285 |
| DRR049026 | DRR067973 | DRR092031 | DRR068325 | DRR049286 |
| DRR049027 | DRR067974 | DRR092032 | DRR068326 | DRR049287 |
| DRR049028 | DRR067975 | DRR092033 | DRR068327 | DRR049288 |
| DRR049029 | DRR067976 | DRR092034 | DRR068328 | DRR049289 |
| DRR049030 | DRR067977 | DRR092035 | DRR068329 | DRR049290 |
| DRR049031 | DRR067978 | DRR092036 | DRR068330 | DRR068168 |
| DRR049032 | DRR067979 | DRR092037 | DRR068331 | DRR068169 |
| DRR049033 | DRR067980 | DRR092038 | DRR068332 | DRR068170 |
| DRR049034 | DRR067981 | DRR092039 | DRR068333 | DRR068171 |
| DRR049035 | DRR067982 | DRR092040 | DRR068334 | DRR068172 |
| DRR049036 | DRR067983 | DRR092042 | DRR068335 | DRR068173 |
| DRR049037 | DRR067984 | DRR092043 | DRR068336 | DRR068174 |
| DRR049038 | DRR067985 | DRR092044 | DRR068337 | DRR068175 |
| DRR049039 | DRR067986 | DRR092045 | DRR068338 | DRR068176 |
| DRR049040 | DRR067987 | DRR092046 | DRR068339 | DRR068177 |
| DRR049041 | DRR067988 | DRR092047 | DRR068340 | DRR068178 |
| DRR049042 | DRR067989 | DRR092048 | DRR068341 | DRR068179 |
| DRR049043 | DRR067990 | DRR092049 | DRR068342 | DRR068180 |
| DRR049044 | DRR067991 | DRR092050 | DRR068343 | DRR068181 |
| DRR049045 | DRR067992 | DRR092051 | DRR068344 | DRR068182 |
| DRR049046 | DRR067993 | DRR092052 | DRR068345 | DRR068183 |
| DRR049047 | DRR067994 | DRR092053 | DRR068346 | DRR068184 |
| DRR049048 | DRR067995 | DRR092054 | DRR068347 | DRR068185 |
| DRR049049 | DRR067996 | DRR092055 | DRR068348 | DRR068186 |
| DRR049050 | DRR067997 | DRR092056 | DRR068349 | DRR068187 |
| DRR049051 | DRR067998 | DRR092057 | DRR068350 | DRR068188 |
| DRR049052 | DRR067999 | DRR092058 | DRR068351 | DRR068189 |
| DRR049053 | DRR068000 | DRR092059 | DRR068352 | DRR068190 |
| DRR049054 | DRR068001 | DRR092060 | DRR068353 | DRR068191 |
| DRR049055 | DRR068002 | DRR092061 | DRR068354 | DRR068192 |
| DRR049056 | DRR068003 | DRR092062 | DRR068355 | DRR068193 |
| DRR049057 | DRR068004 | DRR092063 | DRR068356 | DRR068194 |
| DRR049058 | DRR068005 | DRR092064 | DRR068357 | DRR068195 |
| DRR049059 | DRR068006 | DRR092065 | DRR068358 | DRR068196 |
| DRR049060 | DRR068007 | DRR092066 | DRR068359 | DRR068223 |
| DRR049061 | DRR068008 | DRR092067 | DRR068360 | DRR068224 |
| DRR049062 | DRR068009 | DRR092068 | DRR068361 | DRR068225 |
| DRR049063 | DRR068010 | DRR092070 | DRR068362 | DRR068226 |
| DRR049064 | DRR068011 | DRR092071 | DRR068363 | DRR068227 |
| DRR049065 | DRR068012 | DRR092072 | DRR068364 | DRR068228 |
| DRR049066 | DRR068013 | DRR092073 | DRR068365 | DRR068229 |
| DRR049067 | DRR068014 | DRR092074 | DRR068366 | DRR068230 |
| DRR049068 | DRR068015 | DRR092075 | DRR068367 | DRR049348 |
| DRR049069 | DRR068016 | DRR092076 | DRR068368 | DRR049349 |
| DRR049070 | DRR068017 | DRR092077 | DRR068369 | DRR049350 |
| DRR049071 | DRR068018 | DRR092078 | DRR068370 | DRR049351 |
| DRR049072 | DRR068019 | DRR092079 | DRR068371 | DRR049352 |
| DRR049073 | DRR068020 | DRR092080 | DRR068372 | DRR049353 |
| DRR049074 | DRR068021 | DRR092081 | DRR068373 | DRR049354 |
| DRR049075 | DRR068022 | DRR092082 | DRR068374 | DRR049355 |
| DRR049076 | DRR068023 | DRR092083 | DRR068375 | DRR049356 |
| DRR049077 | DRR068024 | DRR092084 | DRR068376 | DRR049357 |
| DRR049078 | DRR068025 | DRR092085 | DRR068377 | DRR049252 |
| DRR049079 | DRR068026 | DRR092086 | DRR068378 | DRR049253 |
| DRR049080 | DRR068027 | DRR092087 | DRR068379 | DRR049254 |
| DRR049081 | DRR068028 | DRR092088 | DRR068380 | DRR049255 |
| DRR049082 | DRR068029 | DRR092089 | DRR068381 | DRR049256 |
| DRR049083 | DRR068030 | DRR092090 | DRR068382 | DRR049257 |
| DRR049084 | DRR068031 | DRR092091 | DRR068383 | DRR049258 |
| DRR049085 | DRR068032 | DRR092092 | DRR068384 | DRR049259 |
| DRR049086 | DRR068033 | DRR092093 | DRR068385 | DRR049260 |
| DRR049087 | DRR068034 | DRR092094 | DRR068386 | DRR049261 |
| DRR049088 | DRR068035 | DRR092095 | DRR068387 | DRR049262 |
| DRR049089 | DRR068036 | DRR092096 | DRR068388 | DRR049263 |
| DRR049090 | DRR068037 | DRR092097 | DRR068389 | DRR049266 |
| DRR049091 | DRR068038 | DRR092098 | DRR068390 | DRR049269 |
| DRR049092 | DRR068039 | DRR092099 | DRR068391 | DRR049270 |
| DRR049093 | DRR068040 | DRR092100 | DRR068392 | DRR049271 |
| DRR049094 | DRR068041 | DRR092101 | DRR068393 | DRR049272 |
| DRR049095 | DRR068042 | DRR092102 | DRR068394 | DRR049274 |
| DRR049096 | DRR068043 | DRR140577 | DRR068395 | DRR049275 |
| DRR049097 | DRR068044 | DRR140578 | DRR068396 | DRR049276 |
| DRR049098 | DRR068045 | DRR140579 | DRR068397 | DRR049277 |
| DRR049099 | DRR068046 | DRR140580 | DRR068398 | DRR049278 |
| DRR049100 | DRR068047 | DRR140581 | DRR068399 | DRR049279 |
| DRR049101 | DRR068048 | DRR140582 | DRR068400 | DRR049280 |
| DRR049102 | DRR068049 | DRR140583 | DRR068401 | DRR049281 |
| DRR049103 | DRR068050 | DRR140584 | DRR068402 | DRR049282 |
| DRR049104 | DRR068051 | DRR140585 | DRR068403 | DRR068283 |
| DRR049105 | DRR068052 | DRR140586 | SRR7690035 | DRR068284 |
| DRR049106 | DRR068053 | DRR140587 | SRR7690037 | DRR068285 |
| DRR049107 | DRR068054 | DRR140588 | SRR7690041 | DRR068286 |
| DRR049109 | DRR068055 | DRR140589 | SRR7690042 | DRR068287 |
| DRR049110 | DRR068056 | DRR140590 | SRR7690045 | DRR068288 |
| DRR049111 | DRR068057 | DRR140591 | SRR7690050 | DRR068289 |
| DRR049112 | DRR068058 | DRR140592 | SRR7690051 | DRR068290 |
| DRR049113 | DRR068059 | DRR140593 | SRR7690052 | DRR068291 |
| DRR049114 | DRR068060 | DRR140595 | SRR7690054 | DRR068292 |
| DRR049115 | DRR068061 | DRR140596 | SRR7690065 | DRR068197 |
| DRR049116 | DRR068062 | DRR140597 | SRR7690066 | DRR068198 |
| DRR049117 | DRR068063 | DRR140598 | SRR7690067 | DRR068199 |
| DRR049118 | DRR068064 | DRR140599 | SRR7690069 | DRR068200 |
| DRR049119 | DRR068065 | DRR140600 | SRR7690070 | DRR068201 |
| DRR049120 | DRR068066 | DRR140601 | SRR7690073 | DRR068202 |
| DRR049121 | DRR068067 | DRR067888 | SRR7690076 | DRR068203 |
| DRR049122 | DRR068068 | DRR067889 | SRR7690079 | DRR068204 |
| DRR049123 | DRR068069 | DRR067890 | SRR7690083 | DRR068205 |
| DRR049124 | DRR068070 | DRR067891 | SRR7690086 | DRR068206 |
| DRR049125 | DRR068071 | DRR067892 | SRR7690087 | DRR068207 |
| DRR049126 | DRR068072 | DRR067893 | SRR7690095 | DRR068208 |
| DRR049127 | DRR068073 | DRR067894 | SRR7690100 | DRR068209 |
| DRR049128 | DRR068074 | DRR067895 | SRR7690101 | DRR068210 |
| DRR049129 | DRR068075 | DRR067896 | SRR7690102 | DRR068211 |
| DRR049130 | DRR068076 | DRR067897 | SRR7690103 | DRR068212 |
| DRR049131 | DRR068077 | DRR067898 | SRR7690107 | DRR068213 |
| DRR049132 | DRR068078 | DRR067899 | SRR7690111 | DRR068214 |
| DRR049134 | DRR068079 | DRR067900 | SRR7690116 | DRR068215 |
| DRR049135 | DRR068080 | DRR067901 | SRR7690119 | DRR068216 |
| DRR049136 | DRR068081 | DRR067902 | SRR7690120 | DRR068217 |
| DRR049137 | DRR068082 | DRR067903 | SRR7690121 | DRR068218 |
| DRR049138 | DRR068083 | DRR067904 | SRR7690124 | DRR068219 |
| DRR049139 | DRR068084 | DRR067905 | SRR7690129 | DRR068220 |
| DRR049140 | DRR068085 | DRR067906 | SRR7690130 | DRR068221 |
| DRR049141 | DRR068086 | DRR067907 | SRR7690132 | DRR068222 |
| DRR049142 | DRR068087 | DRR067908 | SRR7690136 | DRR049215 |
| DRR049143 | DRR068088 | DRR067909 | SRR7690138 | DRR049216 |
| DRR049144 | DRR068089 | DRR067910 | SRR7690139 | DRR049217 |
| DRR049145 | DRR068090 | DRR067911 | SRR7690145 | DRR049218 |
| DRR049146 | DRR068091 | DRR067912 | SRR7690147 | DRR049219 |
| DRR049147 | DRR068092 | DRR067913 | SRR7690148 | DRR049220 |
| DRR049148 | DRR068093 | DRR067914 | SRR7690155 | DRR049221 |
| DRR049149 | DRR068094 | DRR067915 | SRR7690158 | DRR049222 |
| DRR049150 | DRR068095 | DRR067916 | SRR7690159 | DRR068160 |
| DRR049151 | DRR068096 | DRR067917 | SRR7690160 | DRR068161 |
| DRR049152 | DRR068097 | DRR067918 | SRR7690161 | DRR068162 |
| DRR049153 | DRR068098 | DRR067919 | SRR7690164 | DRR068163 |
| DRR049154 | DRR068099 | DRR067920 | SRR7690166 | DRR068164 |
| DRR049155 | DRR068100 | DRR067921 | SRR7690173 | DRR068165 |
| DRR049156 | DRR068101 | DRR067922 | SRR7690177 | DRR068166 |
| DRR049157 | DRR068102 | DRR067923 | SRR7690181 | DRR068167 |
| DRR049158 | DRR068103 | DRR067924 | SRR7690189 | DRR049340 |
| DRR049159 | DRR068104 | DRR067925 | SRR7690191 | DRR049341 |
| DRR049160 | DRR068105 | DRR067926 | SRR7690194 | DRR049342 |
| DRR049161 | DRR068106 | DRR067927 | SRR7690195 | DRR049343 |
| DRR049162 | DRR068107 | DRR067928 | SRR7690200 | DRR049344 |
| DRR049163 | DRR068108 | DRR067929 | SRR7690202 | DRR049345 |
| DRR049164 | DRR068109 | DRR067930 | SRR7690207 | DRR049346 |
| DRR049165 | DRR068110 | DRR067931 | SRR7690208 | DRR049347 |
| DRR049166 | DRR068111 | DRR067932 | DRR067936 | DRR068275 |
| DRR049167 | DRR068112 | DRR067933 | DRR067937 | DRR068276 |
| DRR049168 | DRR068113 | DRR067934 | DRR067938 | DRR068277 |
| DRR049169 | DRR068114 | DRR067935 | DRR067939 | DRR068278 |
| DRR049170 | DRR068115 | DRR067940 | DRR068231 | DRR068279 |
| DRR049171 | DRR068116 | DRR049291 | DRR068232 | DRR068280 |
| DRR049172 | DRR068117 | DRR049292 | DRR068233 | DRR068281 |
| DRR049173 | DRR068118 | DRR049293 | DRR068234 | DRR068282 |
| DRR049174 | DRR068119 | DRR049294 | DRR068235 | DRR049208 |
| DRR049175 | DRR068120 | DRR049295 | DRR068236 | DRR049209 |
| DRR049176 | DRR068121 | DRR049296 | DRR068237 | DRR049210 |
| DRR049177 | DRR068122 | DRR049297 | DRR068238 | DRR049211 |
| DRR049178 | DRR068123 | DRR049298 | DRR068239 | DRR049212 |
| DRR049179 | DRR068124 | DRR049299 | DRR068240 | DRR049213 |
| DRR049180 | DRR068125 | DRR049300 | DRR068241 | DRR049214 |
| DRR049181 | DRR068126 | DRR049301 | DRR068242 | DRR068153 |
| DRR049182 | DRR068127 | DRR049302 | DRR068243 | DRR068154 |
| DRR049183 | DRR068128 | DRR049303 | DRR068244 | DRR068155 |
| DRR049184 | DRR068129 | DRR049307 | DRR068245 | DRR068156 |
| DRR049185 | DRR068130 | DRR049310 | DRR068246 | DRR068157 |
| DRR049186 | DRR068131 | DRR049311 | DRR068247 | DRR068158 |
| DRR049187 | DRR068132 | DRR049312 | DRR068248 | DRR068159 |
| DRR049188 | DRR068133 | DRR049313 | DRR068249 | DRR049333 |
| DRR049189 | DRR068134 | DRR049314 | DRR068250 | DRR049334 |
| DRR049190 | DRR068135 | DRR049315 | DRR068251 | DRR049335 |
| DRR049191 | DRR068136 | DRR049316 | DRR068252 | DRR049336 |
| DRR049192 | DRR068137 | DRR049317 | DRR068253 | DRR049337 |
| DRR049193 | DRR068138 | DRR049318 | DRR068254 | DRR049338 |
| DRR049194 | DRR068139 | DRR049319 | DRR068255 | DRR049339 |
| DRR049195 | DRR068140 | DRR049320 | DRR068256 | DRR068268 |
| DRR049196 | DRR068141 | DRR049321 | DRR068257 | DRR068269 |
| DRR049197 | DRR068142 | DRR049322 | DRR068258 | DRR068270 |
| DRR049198 | DRR068143 | DRR049323 | DRR068259 | DRR068271 |
| DRR049199 | DRR068144 | DRR049324 | DRR068260 | DRR068272 |
| DRR049200 | DRR068145 | DRR049325 | DRR068261 | DRR068273 |
| DRR049201 | DRR068146 | DRR049326 | DRR068262 | DRR068274 |
| DRR049202 | DRR068147 | DRR049327 | DRR068263 | DRR049207 |
| DRR049203 | DRR068148 | DRR049328 | DRR068264 | DRR068152 |
| DRR049204 | DRR068149 | DRR049329 | DRR068265 | DRR049332 |
| DRR049205 | DRR068150 | DRR049330 | DRR068266 | DRR068267 |
| DRR049206 | DRR068151 | DRR049331 |  |  |
